# Supplementary material for: ML216 Prevents DNA Damage-Induced Senescence by Modulating DBC1–BLM Interaction
Source: MDPI journal article supplement (doi:10.3390/cells12010145), 2022-12-29
Supplement: s1 [file s1]

**Supplementary Table S1** The list for the commonly changed transcripts in both datasets of RNA-Sequencing analysis on DBC1 knockdown cells and BLM knockdown cells, related to Fig. 3A.

| <b>Genes differentially expressed in shDBC1 cells (p&lt;0.05; log2FoldChang&gt;1)</b> |                  |                       |                |                     |
|---------------------------------------------------------------------------------------|------------------|-----------------------|----------------|---------------------|
| <b>Gene_id</b>                                                                        | <b>Gene_name</b> | <b>log2FoldChange</b> | <b>P value</b> | <b>Gene_biotype</b> |
| ENSG00000260287                                                                       | TBC1D3G          | -7.811398504          | 1.09E-06       | protein_coding      |
| ENSG00000189001                                                                       | SBSN             | -7.06091978           | 0.000193974    | protein_coding      |
| ENSG00000077080                                                                       | ACTL6B           | -6.525254434          | 0.002434933    | protein_coding      |
| ENSG00000237330                                                                       | RNF223           | -6.389316369          | 0.004174171    | protein_coding      |
| ENSG00000214402                                                                       | LCNL1            | -6.23922431           | 0.007243414    | protein_coding      |
| ENSG00000162006                                                                       | MSLNL            | -6.23922431           | 0.007243414    | protein_coding      |
| ENSG00000166592                                                                       | RRAD             | -6.23922431           | 0.007243414    | protein_coding      |
| ENSG00000283189                                                                       | AC104452.1       | -6.071684547          | 0.012730848    | protein_coding      |
| ENSG00000070731                                                                       | ST6GALNAC2       | -6.071684547          | 0.012730848    | protein_coding      |
| ENSG00000135114                                                                       | OASL             | -5.882100421          | 0.022676824    | protein_coding      |
| ENSG00000126856                                                                       | PRDM7            | -5.882100421          | 0.022676824    | protein_coding      |
| ENSG00000284820                                                                       | AC068946.2       | -5.663779193          | 0.040964585    | protein_coding      |
| ENSG00000130173                                                                       | ANGPTL8          | -5.663779193          | 0.040964585    | protein_coding      |
| ENSG00000157087                                                                       | ATP2B2           | -5.663779193          | 0.040964585    | protein_coding      |
| ENSG00000104879                                                                       | CKM              | -5.663779193          | 0.040964585    | protein_coding      |
| ENSG00000169393                                                                       | ELSPBP1          | -5.663779193          | 0.040964585    | protein_coding      |
| ENSG00000151948                                                                       | GLT1D1           | -5.663779193          | 0.040964585    | protein_coding      |
| ENSG00000150782                                                                       | IL18             | -5.663779193          | 0.040964585    | protein_coding      |
| ENSG00000005844                                                                       | ITGAL            | -5.663779193          | 0.040964585    | protein_coding      |
| ENSG00000243709                                                                       | LEFTY1           | -5.663779193          | 0.040964585    | protein_coding      |
| ENSG00000283654                                                                       | LMLN2            | -5.663779193          | 0.040964585    | protein_coding      |
| ENSG00000139679                                                                       | LPAR6            | -5.663779193          | 0.040964585    | protein_coding      |
| ENSG00000102854                                                                       | MSLN             | -5.663779193          | 0.040964585    | protein_coding      |
| ENSG00000170476                                                                       | MZB1             | -5.663779193          | 0.040964585    | protein_coding      |
| ENSG00000179256                                                                       | SMCO3            | -5.663779193          | 0.040964585    | protein_coding      |
| ENSG00000269404                                                                       | SPIB             | -5.663779193          | 0.040964585    | protein_coding      |
| ENSG00000120738                                                                       | EGR1             | -4.437832218          | 3.73E-20       | protein_coding      |
| ENSG00000128482                                                                       | RNF112           | -4.020758111          | 0.000884859    | protein_coding      |
| ENSG00000169885                                                                       | CALML6           | -3.967917634          | 1.47E-05       | protein_coding      |
| ENSG00000182853                                                                       | VMO1             | -3.933931             | 0.001369576    | protein_coding      |
| ENSG00000198520                                                                       | ARMH1            | -3.841541751          | 0.002133716    | protein_coding      |
| ENSG00000215217                                                                       | C5orf49          | -3.841541751          | 0.002133716    | protein_coding      |
| ENSG00000179388                                                                       | EGR3             | -3.764467024          | 2.58E-12       | protein_coding      |
| ENSG00000135625                                                                       | EGR4             | -3.742828672          | 0.003346055    | protein_coding      |
| ENSG00000242252                                                                       | BGLAP            | -3.636862034          | 0.005281544    | protein_coding      |
| ENSG00000126895                                                                       | AVPR2            | -3.522490688          | 0.008390282    | protein_coding      |
| ENSG00000172232                                                                       | AZU1             | -3.398265654          | 0.013412089    | protein_coding      |
| ENSG00000167157                                                                       | PRRX2            | -3.338724529          | 0.000739506    | protein_coding      |

|                 |            |              |             |                |
|-----------------|------------|--------------|-------------|----------------|
| ENSG00000101883 | RHOXF1     | -3.338724529 | 0.000739506 | protein_coding |
| ENSG00000099840 | IZUMO4     | -3.336258471 | 8.34E-08    | protein_coding |
| ENSG00000124249 | KCNK15     | -3.265179506 | 0.001084588 | protein_coding |
| ENSG00000213937 | CLDN9      | -3.262327589 | 0.021566548 | protein_coding |
| ENSG00000148655 | LRMDA      | -3.262327589 | 0.021566548 | protein_coding |
| ENSG00000176945 | MUC20      | -3.262327589 | 0.021566548 | protein_coding |
| ENSG00000010379 | SLC6A13    | -3.262327589 | 0.021566548 | protein_coding |
| ENSG00000105427 | CNFN       | -3.260066247 | 8.69E-10    | protein_coding |
| ENSG00000121552 | CSTA       | -3.213969277 | 0.000214972 | protein_coding |
| ENSG00000068976 | PYGM       | -3.213969277 | 0.000214972 | protein_coding |
| ENSG00000130643 | CALY       | -3.200161788 | 2.79E-08    | protein_coding |
| ENSG00000111678 | C12orf57   | -3.189774211 | 2.02E-11    | protein_coding |
| ENSG00000182179 | UBA7       | -3.166696499 | 2.30E-08    | protein_coding |
| ENSG00000268041 | AC010616.1 | -3.159768494 | 0.000299755 | protein_coding |
| ENSG00000105479 | CCDC114    | -3.130090117 | 7.20E-06    | protein_coding |
| ENSG00000089101 | CFAP61     | -3.112235529 | 0.034866602 | protein_coding |
| ENSG00000105523 | FAM83E     | -3.112235529 | 0.034866602 | protein_coding |
| ENSG00000261949 | GFY        | -3.112235529 | 0.034866602 | protein_coding |
| ENSG00000108405 | P2RX1      | -3.112235529 | 0.034866602 | protein_coding |
| ENSG00000176358 | TAC4       | -3.112235529 | 0.034866602 | protein_coding |
| ENSG00000179930 | ZNF648     | -3.112235529 | 0.034866602 | protein_coding |
| ENSG00000174521 | TTC9B      | -3.105786171 | 0.003515158 | protein_coding |
| ENSG00000197921 | HES5       | -3.084823973 | 9.18E-08    | protein_coding |
| ENSG00000176046 | NUPR1      | -3.084010425 | 5.36E-11    | protein_coding |
| ENSG00000278817 | AC007325.4 | -3.000964481 | 3.17E-10    | protein_coding |
| ENSG00000178522 | AMBN       | -2.985608339 | 3.61E-08    | protein_coding |
| ENSG00000100033 | PRODH      | -2.983760269 | 0.000829981 | protein_coding |
| ENSG00000173991 | TCAP       | -2.981856656 | 3.84E-07    | protein_coding |
| ENSG00000125740 | FOSB       | -2.972509594 | 4.39E-11    | protein_coding |
| ENSG00000107796 | ACTA2      | -2.965268706 | 0.000252157 | protein_coding |
| ENSG00000198881 | ASB12      | -2.92656981  | 0.007864773 | protein_coding |
| ENSG00000180644 | PRF1       | -2.92656981  | 0.007864773 | protein_coding |
| ENSG00000160188 | RSPH1      | -2.92656981  | 0.007864773 | protein_coding |
| ENSG00000103269 | RHBDL1     | -2.912298415 | 2.57E-10    | protein_coding |
| ENSG00000122877 | EGR2       | -2.848032956 | 5.38E-06    | protein_coding |
| ENSG00000168918 | INPP5D     | -2.827856732 | 0.011832427 | protein_coding |
| ENSG00000142538 | PTH2       | -2.827856732 | 0.011832427 | protein_coding |
| ENSG00000131096 | PYY        | -2.827856732 | 0.011832427 | protein_coding |
| ENSG00000125508 | SRMS       | -2.827856732 | 0.011832427 | protein_coding |
| ENSG00000168350 | DEGS2      | -2.823005296 | 4.60E-05    | protein_coding |
| ENSG00000170345 | FOS        | -2.765356114 | 4.88E-10    | protein_coding |
| ENSG00000228727 | SAPCD1     | -2.745149476 | 0.000372105 | protein_coding |
| ENSG00000205090 | TMEM240    | -2.728100079 | 9.35E-05    | protein_coding |

|                 |           |              |             |                |
|-----------------|-----------|--------------|-------------|----------------|
| ENSG00000197599 | CCDC154   | -2.721890093 | 0.017862218 | protein_coding |
| ENSG00000183615 | FAM167B   | -2.721890093 | 0.017862218 | protein_coding |
| ENSG00000128310 | GALR3     | -2.721890093 | 0.017862218 | protein_coding |
| ENSG00000109758 | HGFAC     | -2.721890093 | 0.017862218 | protein_coding |
| ENSG00000205323 | SARNP     | -2.721890093 | 0.017862218 | protein_coding |
| ENSG00000167617 | CDC42EP5  | -2.709711    | 0.003385132 | protein_coding |
| ENSG00000179085 | DPM3      | -2.70476857  | 1.28E-09    | protein_coding |
| ENSG00000196275 | GTF2IRD2  | -2.703390415 | 0.001197455 | protein_coding |
| ENSG00000126583 | PRKCG     | -2.650246531 | 6.52E-06    | protein_coding |
| ENSG00000220201 | ZGLP1     | -2.617005594 | 0.000391938 | protein_coding |
| ENSG00000213977 | TAX1BP3   | -2.611755277 | 5.93E-05    | protein_coding |
| ENSG00000128564 | VGF       | -2.603691343 | 0.000883969 | protein_coding |
| ENSG00000181085 | MAPK15    | -2.592090822 | 2.46E-08    | protein_coding |
| ENSG00000137474 | MYO7A     | -2.590991293 | 0.000246499 | protein_coding |
| ENSG00000182472 | CAPN12    | -2.583699004 | 0.002275868 | protein_coding |
| ENSG00000198502 | HLA-DRB5  | -2.571062232 | 0.000162828 | protein_coding |
| ENSG00000185633 | NDUFA4L2  | -2.555772014 | 2.01E-05    | protein_coding |
| ENSG00000185291 | IL3RA     | -2.55530542  | 9.06E-05    | protein_coding |
| ENSG00000248712 | CCDC153   | -2.553278878 | 0.001184832 | protein_coding |
| ENSG00000239282 | CASTOR1   | -2.550317664 | 0.010033723 | protein_coding |
| ENSG00000147003 | CLTRN     | -2.550317664 | 0.010033723 | protein_coding |
| ENSG00000142233 | NTN5      | -2.550317664 | 0.010033723 | protein_coding |
| ENSG00000064787 | BCAS1     | -2.519911068 | 0.003149424 | protein_coding |
| ENSG00000101222 | SPEF1     | -2.505653433 | 0.000258125 | protein_coding |
| ENSG00000146700 | SSC4D     | -2.489214068 | 9.78E-05    | protein_coding |
| ENSG00000170209 | ANKK1     | -2.483293713 | 0.041032031 | protein_coding |
| ENSG00000151023 | ENKUR     | -2.483293713 | 0.041032031 | protein_coding |
| ENSG00000101188 | NTSR1     | -2.483293713 | 0.041032031 | protein_coding |
| ENSG00000170835 | CEL       | -2.478868536 | 0.000519431 | protein_coding |
| ENSG00000008517 | IL32      | -2.463490553 | 0.014485426 | protein_coding |
| ENSG00000133246 | PRAM1     | -2.463490553 | 0.014485426 | protein_coding |
| ENSG00000185615 | PDIA2     | -2.449236765 | 1.98E-07    | protein_coding |
| ENSG00000100359 | SGSM3     | -2.448531967 | 2.72E-06    | protein_coding |
| ENSG00000072182 | ASIC4     | -2.442558694 | 0.00115274  | protein_coding |
| ENSG00000214967 | NPIPA7    | -2.442558694 | 0.00115274  | protein_coding |
| ENSG00000184351 | KRTAP19-1 | -2.43947051  | 0.000668181 | protein_coding |
| ENSG00000229637 | PRAC2     | -2.435313356 | 0.000266845 | protein_coding |
| ENSG00000008128 | CDK11A    | -2.431638192 | 4.03E-05    | protein_coding |
| ENSG00000162755 | KLHDC9    | -2.430052228 | 2.44E-05    | protein_coding |
| ENSG00000213199 | ASIC3     | -2.418613875 | 1.55E-07    | protein_coding |
| ENSG00000185522 | LMNTD2    | -2.416072969 | 1.36E-06    | protein_coding |
| ENSG00000163499 | CRYBA2    | -2.390523257 | 0.00288962  | protein_coding |
| ENSG00000244242 | IFITM10   | -2.383194758 | 0.006072876 | protein_coding |

|                 |           |              |             |                |
|-----------------|-----------|--------------|-------------|----------------|
| ENSG00000136732 | GYPC      | -2.374809761 | 1.02E-07    | protein_coding |
| ENSG00000118307 | CASC1     | -2.371101304 | 0.020952111 | protein_coding |
| ENSG00000250506 | CDK3      | -2.371101304 | 0.020952111 | protein_coding |
| ENSG00000213999 | MEF2B     | -2.371101304 | 0.020952111 | protein_coding |
| ENSG00000025423 | HSD17B6   | -2.365613353 | 7.51E-07    | protein_coding |
| ENSG00000203896 | LIME1     | -2.362412098 | 2.85E-06    | protein_coding |
| ENSG00000108309 | RUNDC3A   | -2.359029249 | 7.11E-05    | protein_coding |
| ENSG00000262484 | CCER2     | -2.353385233 | 9.78E-05    | protein_coding |
| ENSG00000198156 | NPIP6     | -2.34659764  | 0.000336783 | protein_coding |
| ENSG00000117407 | ARTN      | -2.337077196 | 3.46E-05    | protein_coding |
| ENSG00000125995 | ROMO1     | -2.332029059 | 8.20E-08    | protein_coding |
| ENSG00000114270 | COL7A1    | -2.330062313 | 2.01E-07    | protein_coding |
| ENSG00000069696 | DRD4      | -2.323320272 | 1.08E-05    | protein_coding |
| ENSG00000256061 | DNAAF4    | -2.309649736 | 0.008458934 | protein_coding |
| ENSG00000255150 | EID3      | -2.309649736 | 0.008458934 | protein_coding |
| ENSG00000130208 | APOC1     | -2.305615738 | 2.25E-07    | protein_coding |
| ENSG00000222009 | BTBD19    | -2.272388225 | 0.030348148 | protein_coding |
| ENSG00000172543 | CTSW      | -2.272388225 | 0.030348148 | protein_coding |
| ENSG00000139914 | FITM1     | -2.272388225 | 0.030348148 | protein_coding |
| ENSG00000121905 | HPCA      | -2.272388225 | 0.030348148 | protein_coding |
| ENSG00000276600 | RAB7B     | -2.272388225 | 0.030348148 | protein_coding |
| ENSG00000204389 | HSPA1A    | -2.265459839 | 5.79E-07    | protein_coding |
| ENSG00000234776 | C11orf94  | -2.244078844 | 0.003489554 | protein_coding |
| ENSG00000171703 | TCEA2     | -2.231089452 | 3.35E-07    | protein_coding |
| ENSG00000182196 | ARL6IP4   | -2.219696813 | 0.000159888 | protein_coding |
| ENSG00000241468 | ATP5MF    | -2.216325986 | 2.64E-07    | protein_coding |
| ENSG00000142102 | PGGHG     | -2.205895487 | 3.99E-07    | protein_coding |
| ENSG00000214212 | C19orf38  | -2.189878061 | 0.004621058 | protein_coding |
| ENSG00000213123 | TCTEX1D2  | -2.177400242 | 0.003128224 | protein_coding |
| ENSG00000089820 | ARHGAP4   | -2.170501849 | 1.38E-05    | protein_coding |
| ENSG00000105219 | CNTD2     | -2.166421587 | 0.043991311 | protein_coding |
| ENSG00000154545 | MAGED4    | -2.166421587 | 0.043991311 | protein_coding |
| ENSG00000148826 | NKX6-2    | -2.166421587 | 0.043991311 | protein_coding |
| ENSG00000213658 | LAT       | -2.1502564   | 0.016492881 | protein_coding |
| ENSG00000153902 | LGI4      | -2.1502564   | 0.016492881 | protein_coding |
| ENSG00000184678 | HIST2H2BE | -2.1475694   | 5.01E-06    | protein_coding |
| ENSG00000052344 | PRSS8     | -2.140304631 | 0.009732694 | protein_coding |
| ENSG00000105672 | ETV2      | -2.138834945 | 0.000236256 | protein_coding |
| ENSG00000142765 | SYTL1     | -2.131308576 | 1.80E-05    | protein_coding |
| ENSG00000205593 | DENND6B   | -2.130583264 | 8.17E-06    | protein_coding |
| ENSG00000184163 | C1QTNF12  | -2.125586431 | 8.17E-05    | protein_coding |
| ENSG00000188573 | FBLL1     | -2.121303817 | 5.71E-05    | protein_coding |
| ENSG00000187848 | P2RX2     | -2.111123709 | 0.000176356 | protein_coding |

|                 |          |              |             |                |
|-----------------|----------|--------------|-------------|----------------|
| ENSG00000221821 | C6orf226 | -2.109805748 | 0.000135269 | protein_coding |
| ENSG00000160539 | PLPP7    | -2.106188001 | 4.56E-05    | protein_coding |
| ENSG00000127415 | IDUA     | -2.10166063  | 7.18E-06    | protein_coding |
| ENSG00000104899 | AMH      | -2.100895125 | 1.17E-06    | protein_coding |
| ENSG00000266714 | MYO15B   | -2.095723623 | 1.11E-05    | protein_coding |
| ENSG00000150281 | CTF1     | -2.090976439 | 0.000156638 | protein_coding |
| ENSG00000183054 | RGPD6    | -2.080776579 | 0.00360343  | protein_coding |
| ENSG00000138100 | TRIM54   | -2.078277573 | 0.005290723 | protein_coding |
| ENSG00000101213 | PTK6     | -2.066901712 | 0.000284711 | protein_coding |
| ENSG00000130203 | APOE     | -2.064591187 | 1.25E-05    | protein_coding |
| ENSG00000188596 | CFAP54   | -2.063429289 | 0.032292239 | protein_coding |
| ENSG00000198223 | CSF2RA   | -2.063429289 | 0.032292239 | protein_coding |
| ENSG00000205560 | CPT1B    | -2.059590851 | 0.000498242 | protein_coding |
| ENSG00000187479 | C11orf96 | -2.057365248 | 3.49E-05    | protein_coding |
| ENSG00000100429 | HDAC10   | -2.057365248 | 3.49E-05    | protein_coding |
| ENSG00000119632 | IFI27L2  | -2.052632112 | 1.37E-05    | protein_coding |
| ENSG00000130707 | ASS1     | -2.048518379 | 1.93E-06    | protein_coding |
| ENSG00000205155 | PSENEN   | -2.044559931 | 7.15E-06    | protein_coding |
| ENSG00000100031 | GGT1     | -2.038489626 | 5.95E-05    | protein_coding |
| ENSG00000260428 | SCX      | -2.035147809 | 0.004613369 | protein_coding |
| ENSG00000184838 | PRR16    | -2.026039549 | 0.006891763 | protein_coding |
| ENSG00000137101 | CD72     | -2.025391811 | 0.000931128 | protein_coding |
| ENSG00000221916 | C19orf73 | -2.025122134 | 0.000334323 | protein_coding |
| ENSG00000215440 | NPEPL1   | -2.024663972 | 1.95E-05    | protein_coding |
| ENSG00000142530 | FAM71E1  | -2.021347741 | 2.78E-05    | protein_coding |
| ENSG00000103145 | HCFC1R1  | -2.01753908  | 4.90E-06    | protein_coding |
| ENSG00000159588 | CCDC17   | -2.013869835 | 0.010811714 | protein_coding |
| ENSG00000127588 | GNG13    | -2.013622696 | 3.61E-05    | protein_coding |
| ENSG00000127578 | WFIKKN1  | -2.002796114 | 0.000392948 | protein_coding |
| ENSG00000135502 | SLC26A10 | -2.001477623 | 7.03E-05    | protein_coding |
| ENSG00000140675 | SLC5A2   | -2.000546585 | 0.004060649 | protein_coding |
| ENSG00000012171 | SEMA3B   | -1.994819138 | 2.48E-05    | protein_coding |
| ENSG00000205143 | ARID3C   | -1.988028651 | 0.005911861 | protein_coding |
| ENSG00000176973 | FAM89B   | -1.987805988 | 3.19E-05    | protein_coding |
| ENSG00000177106 | EPS8L2   | -1.983445534 | 0.000189057 | protein_coding |
| ENSG00000007952 | NOX1     | -1.980119157 | 0.000462155 | protein_coding |
| ENSG00000135441 | BLOC1S1  | -1.976320667 | 1.84E-05    | protein_coding |
| ENSG00000257704 | INAFM1   | -1.972842091 | 1.73E-05    | protein_coding |
| ENSG00000232388 | SMIM26   | -1.972335978 | 6.52E-06    | protein_coding |
| ENSG00000184697 | CLDN6    | -1.971838766 | 0.00898543  | protein_coding |
| ENSG00000244731 | C4A      | -1.97104004  | 0.045202178 | protein_coding |
| ENSG00000089199 | CHGB     | -1.97104004  | 0.045202178 | protein_coding |
| ENSG00000130427 | EPO      | -1.97104004  | 0.045202178 | protein_coding |

|                 |           |              |             |                |
|-----------------|-----------|--------------|-------------|----------------|
| ENSG00000163497 | FEV       | -1.97104004  | 0.045202178 | protein_coding |
| ENSG00000182687 | GALR2     | -1.97104004  | 0.045202178 | protein_coding |
| ENSG00000243708 | PLA2G4B   | -1.97104004  | 0.045202178 | protein_coding |
| ENSG00000176978 | DPP7      | -1.959427296 | 1.08E-05    | protein_coding |
| ENSG00000143369 | ECM1      | -1.95763255  | 0.00512978  | protein_coding |
| ENSG00000165695 | AK8       | -1.957080052 | 0.000543898 | protein_coding |
| ENSG00000089692 | LAG3      | -1.950081899 | 0.014380224 | protein_coding |
| ENSG00000206140 | TMEM191C  | -1.948458168 | 0.0032271   | protein_coding |
| ENSG00000129673 | AANAT     | -1.939318447 | 0.007582043 | protein_coding |
| ENSG00000164405 | UQCRQ     | -1.934688244 | 5.68E-06    | protein_coding |
| ENSG00000197568 | HHLA3     | -1.927271129 | 1.88E-05    | protein_coding |
| ENSG00000182685 | BRICD5    | -1.920286768 | 0.000158397 | protein_coding |
| ENSG00000197530 | MIB2      | -1.907208648 | 9.19E-06    | protein_coding |
| ENSG00000182809 | CRIP2     | -1.892734611 | 9.90E-05    | protein_coding |
| ENSG00000100604 | CHGA      | -1.892262009 | 0.00561466  | protein_coding |
| ENSG00000074660 | SCARF1    | -1.892262009 | 0.00561466  | protein_coding |
| ENSG00000100097 | LGALS1    | -1.890924613 | 0.000412542 | protein_coding |
| ENSG00000135409 | AMHR2     | -1.888905982 | 0.009730816 | protein_coding |
| ENSG00000188243 | COMMD6    | -1.8887785   | 1.21E-05    | protein_coding |
| ENSG00000105699 | LSR       | -1.887594566 | 1.31E-05    | protein_coding |
| ENSG00000165349 | SLC7A3    | -1.884028644 | 2.80E-05    | protein_coding |
| ENSG00000170458 | CD14      | -1.88334262  | 0.019137366 | protein_coding |
| ENSG00000188672 | RHCE      | -1.88334262  | 0.019137366 | protein_coding |
| ENSG00000158815 | FGF17     | -1.880802338 | 0.000552409 | protein_coding |
| ENSG00000125611 | CHCHD5    | -1.880230021 | 1.95E-05    | protein_coding |
| ENSG00000184381 | PLA2G6    | -1.873834913 | 2.44E-05    | protein_coding |
| ENSG00000169020 | ATP5ME    | -1.870229522 | 1.63E-05    | protein_coding |
| ENSG00000152082 | MZT2B     | -1.8669941   | 1.25E-05    | protein_coding |
| ENSG00000240583 | AQP1      | -1.859842361 | 0.002617946 | protein_coding |
| ENSG00000100399 | CHADL     | -1.856917147 | 0.015305394 | protein_coding |
| ENSG00000187688 | TRPV2     | -1.856917147 | 0.015305394 | protein_coding |
| ENSG00000134825 | TMEM258   | -1.856210634 | 1.41E-05    | protein_coding |
| ENSG00000239779 | WBP1      | -1.853602288 | 3.88E-05    | protein_coding |
| ENSG00000126759 | CFP       | -1.850587697 | 0.00701327  | protein_coding |
| ENSG00000105696 | TMEM59L   | -1.847985297 | 0.000257696 | protein_coding |
| ENSG00000185201 | IFITM2    | -1.845006547 | 9.10E-05    | protein_coding |
| ENSG00000215788 | TNFRSF25  | -1.844799823 | 0.000131231 | protein_coding |
| ENSG00000173762 | CD7       | -1.837389242 | 0.033376343 | protein_coding |
| ENSG00000124159 | MATN4     | -1.837389242 | 0.033376343 | protein_coding |
| ENSG00000179954 | SSC5D     | -1.837389242 | 0.033376343 | protein_coding |
| ENSG00000261408 | TEN1-CDK3 | -1.836144045 | 0.002183911 | protein_coding |
| ENSG00000183617 | MRPL54    | -1.83572062  | 1.87E-05    | protein_coding |
| ENSG00000166595 | CIAO2B    | -1.818349915 | 2.28E-05    | protein_coding |

|                 |                  |              |             |                |
|-----------------|------------------|--------------|-------------|----------------|
| ENSG00000078018 | MAP2             | -1.813365589 | 0.025475297 | protein_coding |
| ENSG00000178226 | PRSS36           | -1.813365589 | 0.025475297 | protein_coding |
| ENSG00000149575 | SCN2B            | -1.813365589 | 0.025475297 | protein_coding |
| ENSG00000105404 | RABAC1           | -1.812559449 | 4.33E-05    | protein_coding |
| ENSG00000182326 | C1S              | -1.811740233 | 0.000679363 | protein_coding |
| ENSG00000254995 | STX16-<br>NPEPL1 | -1.810539058 | 0.0014637   | protein_coding |
| ENSG00000233198 | RNF224           | -1.807673662 | 0.008764824 | protein_coding |
| ENSG00000140400 | MAN2C1           | -1.798478435 | 2.46E-05    | protein_coding |
| ENSG00000198918 | RPL39            | -1.797595829 | 2.13E-05    | protein_coding |
| ENSG00000179698 | WDR97            | -1.796937385 | 0.007498916 | protein_coding |
| ENSG00000273154 | AL121845.3       | -1.795830541 | 0.019987884 | protein_coding |
| ENSG00000092295 | TGM1             | -1.782783081 | 0.001103785 | protein_coding |
| ENSG00000100312 | ACR              | -1.782467175 | 0.016051556 | protein_coding |
| ENSG00000105472 | CLEC11A          | -1.782379277 | 7.03E-05    | protein_coding |
| ENSG00000160888 | IER2             | -1.779166811 | 3.22E-05    | protein_coding |
| ENSG00000163453 | IGFBP7           | -1.77825559  | 0.000675908 | protein_coding |
| ENSG00000183011 | NAA38            | -1.777318329 | 3.05E-05    | protein_coding |
| ENSG00000095059 | DHPS             | -1.773175841 | 0.000158409 | protein_coding |
| ENSG00000101282 | RSPO4            | -1.771944636 | 0.013149317 | protein_coding |
| ENSG00000198258 | UBL5             | -1.767708205 | 3.19E-05    | protein_coding |
| ENSG00000231389 | HLA-DPA1         | -1.767217061 | 0.000114831 | protein_coding |
| ENSG00000186352 | ANKRD37          | -1.76344388  | 0.010958385 | protein_coding |
| ENSG00000112695 | COX7A2           | -1.756794141 | 3.46E-05    | protein_coding |
| ENSG00000123358 | NR4A1            | -1.745893606 | 4.88E-05    | protein_coding |
| ENSG00000054148 | PHPT1            | -1.743324743 | 4.04E-05    | protein_coding |
| ENSG00000134940 | ACRV1            | -1.739820566 | 0.033910222 | protein_coding |
| ENSG00000179057 | IGSF22           | -1.739820566 | 0.033910222 | protein_coding |
| ENSG00000170906 | NDUFA3           | -1.737486303 | 5.03E-05    | protein_coding |
| ENSG00000196436 | NPIP15           | -1.736895585 | 0.001306375 | protein_coding |
| ENSG00000142046 | TMEM91           | -1.736895585 | 0.001306375 | protein_coding |
| ENSG00000177595 | PIDD1            | -1.735940904 | 4.87E-05    | protein_coding |
| ENSG00000260001 | TGFBR3L          | -1.734195283 | 0.002638872 | protein_coding |
| ENSG00000139410 | SDSL             | -1.730934173 | 0.000330356 | protein_coding |
| ENSG00000204427 | ABHD16A          | -1.728681866 | 0.002229387 | protein_coding |
| ENSG00000111653 | ING4             | -1.727831088 | 9.32E-05    | protein_coding |
| ENSG00000105755 | ETHE1            | -1.723926572 | 0.000236059 | protein_coding |
| ENSG00000042493 | CAPG             | -1.722469002 | 0.000128574 | protein_coding |
| ENSG00000144908 | ALDH1L1          | -1.721532171 | 0.016654638 | protein_coding |
| ENSG00000163354 | DCST2            | -1.721532171 | 0.016654638 | protein_coding |
| ENSG00000163873 | GRIK3            | -1.721532171 | 0.016654638 | protein_coding |
| ENSG00000228253 | MT-ATP8          | -1.720496336 | 7.67E-05    | protein_coding |
| ENSG00000182902 | SLC25A18         | -1.71781511  | 0.013705036 | protein_coding |

|                 |          |              |             |                |
|-----------------|----------|--------------|-------------|----------------|
| ENSG00000172346 | CSDC2    | -1.717561594 | 0.001490418 | protein_coding |
| ENSG00000151366 | NDUFC2   | -1.71615386  | 7.91E-05    | protein_coding |
| ENSG00000243449 | C4orf48  | -1.715722509 | 6.42E-05    | protein_coding |
| ENSG00000135940 | COX5B    | -1.715000509 | 5.08E-05    | protein_coding |
| ENSG00000134595 | SOX3     | -1.712201589 | 0.006068669 | protein_coding |
| ENSG00000007255 | TRAPPC6A | -1.712145525 | 8.89E-05    | protein_coding |
| ENSG00000108602 | ALDH3A1  | -1.708163774 | 0.004688294 | protein_coding |
| ENSG00000250067 | YJEFN3   | -1.707410614 | 0.000175395 | protein_coding |
| ENSG00000197756 | RPL37A   | -1.703614366 | 5.35E-05    | protein_coding |
| ENSG00000130255 | RPL36    | -1.701486858 | 5.47E-05    | protein_coding |
| ENSG00000213741 | RPS29    | -1.696537896 | 5.88E-05    | protein_coding |
| ENSG00000134419 | RPS15A   | -1.689364183 | 6.36E-05    | protein_coding |
| ENSG00000148450 | MSRB2    | -1.682721601 | 0.000125718 | protein_coding |
| ENSG00000189171 | S100A13  | -1.682680147 | 0.000126994 | protein_coding |
| ENSG00000170961 | HAS2     | -1.679871769 | 0.000884383 | protein_coding |
| ENSG00000085514 | PILRA    | -1.677339809 | 0.002399103 | protein_coding |
| ENSG00000172803 | SNX32    | -1.675913736 | 0.003389794 | protein_coding |
| ENSG00000175701 | MTLN     | -1.674012113 | 0.000186426 | protein_coding |
| ENSG00000153093 | ACOXL    | -1.672803563 | 0.007498916 | protein_coding |
| ENSG00000172638 | EFEMP2   | -1.671844827 | 0.01417872  | protein_coding |
| ENSG00000111432 | FZD10    | -1.671756898 | 0.000162217 | protein_coding |
| ENSG00000160282 | FTCD     | -1.670695952 | 0.017143019 | protein_coding |
| ENSG00000185885 | IFITM1   | -1.667800528 | 0.000309601 | protein_coding |
| ENSG00000149926 | FAM57B   | -1.665303326 | 0.034088382 | protein_coding |
| ENSG00000147036 | LANCL3   | -1.665303326 | 0.034088382 | protein_coding |
| ENSG00000116785 | CFHR3    | -1.662324062 | 0.045117465 | protein_coding |
| ENSG00000276180 | HIST1H4I | -1.660416828 | 0.00015472  | protein_coding |
| ENSG00000108465 | CDK5RAP3 | -1.651310534 | 0.000145216 | protein_coding |
| ENSG00000155428 | TRIM74   | -1.651220856 | 0.00330135  | protein_coding |
| ENSG00000204839 | MROH6    | -1.648302618 | 0.000496612 | protein_coding |
| ENSG00000167103 | PIP5KL1  | -1.642674236 | 0.001830438 | protein_coding |
| ENSG00000197191 | CYSRT1   | -1.637229005 | 0.000762609 | protein_coding |
| ENSG00000186395 | KRT10    | -1.636999699 | 0.00013948  | protein_coding |
| ENSG00000076944 | STXBP2   | -1.632970329 | 0.000162218 | protein_coding |
| ENSG00000172809 | RPL38    | -1.62904977  | 0.0001094   | protein_coding |
| ENSG00000239382 | ALKBH6   | -1.628460522 | 0.001834907 | protein_coding |
| ENSG00000105290 | APLP1    | -1.628245419 | 0.000208019 | protein_coding |
| ENSG00000131097 | HIGD1B   | -1.627615045 | 0.017539069 | protein_coding |
| ENSG00000198892 | SHISA4   | -1.627615045 | 0.017539069 | protein_coding |
| ENSG00000172428 | COPS9    | -1.6239771   | 0.000138578 | protein_coding |
| ENSG00000177600 | RPLP2    | -1.622631749 | 0.000114942 | protein_coding |
| ENSG00000188372 | ZP3      | -1.622005393 | 0.004272904 | protein_coding |
| ENSG00000140264 | SERF2    | -1.620717571 | 0.000123894 | protein_coding |



|                 |           |              |             |                |
|-----------------|-----------|--------------|-------------|----------------|
| ENSG00000160323 | ADAMTS13  | -1.620624266 | 0.000178751 | protein_coding |
| ENSG00000158373 | HIST1H2BD | -1.619514    | 0.002684397 | protein_coding |
| ENSG00000131400 | NAPSA     | -1.615093364 | 0.026720022 | protein_coding |
| ENSG00000183889 | PKD1P1    | -1.615093364 | 0.026720022 | protein_coding |
| ENSG00000163191 | S100A11   | -1.614105219 | 0.000154599 | protein_coding |
| ENSG00000177954 | RPS27     | -1.610913073 | 0.000128493 | protein_coding |
| ENSG00000105258 | POLR2I    | -1.609934366 | 0.000222837 | protein_coding |
| ENSG00000204444 | APOM      | -1.609508286 | 0.007259967 | protein_coding |
| ENSG00000185482 | STAC3     | -1.60318844  | 0.004091611 | protein_coding |
| ENSG00000110492 | MDK       | -1.601169095 | 0.000148524 | protein_coding |
| ENSG00000137818 | RPLP1     | -1.599340392 | 0.000141576 | protein_coding |
| ENSG00000160781 | PAQR6     | -1.596121351 | 0.000277794 | protein_coding |
| ENSG00000198576 | ARC       | -1.594565012 | 0.001027208 | protein_coding |
| ENSG00000174886 | NDUFA11   | -1.593788572 | 0.000218501 | protein_coding |
| ENSG00000171858 | RPS21     | -1.592580809 | 0.000154168 | protein_coding |
| ENSG00000128218 | VPREB3    | -1.59062504  | 0.017860441 | protein_coding |
| ENSG00000128298 | BAIAP2L2  | -1.588663836 | 0.005639186 | protein_coding |
| ENSG00000132635 | PCED1A    | -1.585699554 | 0.000189297 | protein_coding |
| ENSG00000160948 | VPS28     | -1.583862023 | 0.000193508 | protein_coding |
| ENSG00000149599 | DUSP15    | -1.583434831 | 0.001114197 | protein_coding |
| ENSG00000111775 | COX6A1    | -1.582496006 | 0.000182669 | protein_coding |
| ENSG00000143303 | RRNAD1    | -1.580068389 | 0.000238503 | protein_coding |
| ENSG00000107874 | CUEDC2    | -1.5779055   | 0.000198178 | protein_coding |
| ENSG00000062524 | LTK       | -1.577873532 | 0.000624485 | protein_coding |
| ENSG00000120075 | HOXB5     | -1.575852226 | 0.000384392 | protein_coding |
| ENSG00000106400 | ZNHIT1    | -1.574026991 | 0.000196892 | protein_coding |
| ENSG00000163344 | PMVK      | -1.573230797 | 0.000223981 | protein_coding |
| ENSG00000176476 | SGF29     | -1.57236758  | 0.000276105 | protein_coding |
| ENSG00000100889 | PCK2      | -1.571972216 | 0.000201043 | protein_coding |
| ENSG00000174938 | SEZ6L2    | -1.571693106 | 0.000228324 | protein_coding |
| ENSG00000174917 | C19orf70  | -1.570199641 | 0.000213713 | protein_coding |
| ENSG00000196296 | ATP2A1    | -1.567902722 | 0.000863527 | protein_coding |
| ENSG00000089847 | ANKRD24   | -1.567715484 | 0.010138421 | protein_coding |
| ENSG00000089163 | SIRT4     | -1.567715484 | 0.010138421 | protein_coding |
| ENSG00000115257 | PCSK4     | -1.566586763 | 0.000909076 | protein_coding |
| ENSG00000063180 | CA11      | -1.566141341 | 0.00030809  | protein_coding |
| ENSG00000176894 | PXMP2     | -1.564934498 | 0.000585308 | protein_coding |
| ENSG00000187961 | KLHL17    | -1.564433817 | 0.000232465 | protein_coding |
| ENSG00000173272 | MZT2A     | -1.564226095 | 0.000206742 | protein_coding |
| ENSG00000274386 | TMEM269   | -1.564174743 | 0.004529785 | protein_coding |
| ENSG00000181218 | HIST3H2A  | -1.560985963 | 0.00025556  | protein_coding |
| ENSG00000115596 | WNT6      | -1.558776549 | 0.033832332 | protein_coding |
| ENSG00000143994 | ABHD1     | -1.558367201 | 0.006686163 | protein_coding |

|                 |           |              |             |                |
|-----------------|-----------|--------------|-------------|----------------|
| ENSG00000185499 | MUC1      | -1.558367201 | 0.006686163 | protein_coding |
| ENSG00000124140 | SLC12A5   | -1.558367201 | 0.006686163 | protein_coding |
| ENSG00000161265 | U2AF1L4   | -1.558141548 | 0.002517475 | protein_coding |
| ENSG00000105538 | RASIP1    | -1.556362233 | 0.000714343 | protein_coding |
| ENSG00000130066 | SAT1      | -1.555929279 | 0.00026419  | protein_coding |
| ENSG00000204435 | CSNK2B    | -1.55329927  | 0.000363062 | protein_coding |
| ENSG00000188368 | PRR19     | -1.551769023 | 0.005549857 | protein_coding |
| ENSG00000182154 | MRPL41    | -1.550611296 | 0.000242333 | protein_coding |
| ENSG00000189283 | FHIT      | -1.55053097  | 0.000694733 | protein_coding |
| ENSG00000175894 | TSPEAR    | -1.547711006 | 0.021872151 | protein_coding |
| ENSG00000117480 | FAAH      | -1.543176996 | 0.001073018 | protein_coding |
| ENSG00000135636 | DYSF      | -1.54099257  | 0.010511842 | protein_coding |
| ENSG00000196126 | HLA-DRB1  | -1.540588284 | 0.001044809 | protein_coding |
| ENSG00000187840 | EIF4EBP1  | -1.539702069 | 0.00025014  | protein_coding |
| ENSG00000187608 | ISG15     | -1.53858666  | 0.000635717 | protein_coding |
| ENSG00000129559 | NEDD8     | -1.538339291 | 0.000304925 | protein_coding |
| ENSG00000171160 | MORN4     | -1.537582773 | 0.000453295 | protein_coding |
| ENSG00000125652 | ALKBH7    | -1.536862458 | 0.000328104 | protein_coding |
| ENSG00000138495 | COX17     | -1.531130278 | 0.000341726 | protein_coding |
| ENSG00000105379 | ETFB      | -1.530867428 | 0.000366743 | protein_coding |
| ENSG00000163666 | HESX1     | -1.530801392 | 0.004943748 | protein_coding |
| ENSG00000229117 | RPL41     | -1.530419129 | 0.000264326 | protein_coding |
| ENSG00000125730 | C3        | -1.530357944 | 0.012302827 | protein_coding |
| ENSG00000182870 | GALNT9    | -1.530357944 | 0.012302827 | protein_coding |
| ENSG00000102057 | KCND1     | -1.530357944 | 0.012302827 | protein_coding |
| ENSG00000272899 | ATP6V1FNB | -1.527420664 | 0.009406001 | protein_coding |
| ENSG00000213398 | LCAT      | -1.52737361  | 0.003420538 | protein_coding |
| ENSG00000162300 | ZFPL1     | -1.526141516 | 0.000672463 | protein_coding |
| ENSG00000119650 | IFT43     | -1.524792124 | 0.00045964  | protein_coding |
| ENSG00000102886 | GDPD3     | -1.523823861 | 0.005443567 | protein_coding |
| ENSG00000154134 | ROBO3     | -1.520828897 | 0.000452963 | protein_coding |
| ENSG00000259803 | SLC22A31  | -1.51956634  | 0.001213375 | protein_coding |
| ENSG00000203780 | FANK1     | -1.519335259 | 0.033533086 | protein_coding |
| ENSG00000151715 | TMEM45B   | -1.519335259 | 0.033533086 | protein_coding |
| ENSG00000189143 | CLDN4     | -1.517169485 | 0.010850785 | protein_coding |
| ENSG00000137880 | GCHFR     | -1.517169485 | 0.010850785 | protein_coding |
| ENSG00000185324 | CDK10     | -1.514245549 | 0.000349292 | protein_coding |
| ENSG00000090006 | LTBP4     | -1.513728975 | 0.000333753 | protein_coding |
| ENSG00000141552 | ANAPC11   | -1.512929449 | 0.000334065 | protein_coding |
| ENSG00000203724 | C1orf53   | -1.512204134 | 0.000922867 | protein_coding |
| ENSG00000130748 | TMEM160   | -1.510443252 | 0.000383742 | protein_coding |
| ENSG00000185236 | RAB11B    | -1.507904792 | 0.000373044 | protein_coding |
| ENSG00000198467 | TPM2      | -1.507841291 | 0.000746859 | protein_coding |

|                 |          |              |             |                |
|-----------------|----------|--------------|-------------|----------------|
| ENSG00000169627 | BOLA2B   | -1.506806644 | 0.008232207 | protein_coding |
| ENSG00000011028 | MRC2     | -1.504915076 | 0.00043781  | protein_coding |
| ENSG00000173818 | ENDOV    | -1.504104329 | 0.000592747 | protein_coding |
| ENSG00000104814 | MAP4K1   | -1.503117869 | 0.004137476 | protein_coding |
| ENSG00000185838 | GNB1L    | -1.498752582 | 0.000438605 | protein_coding |
| ENSG00000143545 | RAB13    | -1.498261433 | 0.000869728 | protein_coding |
| ENSG00000012822 | CALCOCO1 | -1.498094737 | 0.000465108 | protein_coding |
| ENSG00000149922 | TBX6     | -1.496273701 | 0.005055914 | protein_coding |
| ENSG00000135519 | KCNH3    | -1.495517403 | 0.002050888 | protein_coding |
| ENSG00000160200 | CBS      | -1.494426394 | 0.000409673 | protein_coding |
| ENSG00000103056 | SMPD3    | -1.492007286 | 0.014931034 | protein_coding |
| ENSG00000235034 | C19orf81 | -1.486657059 | 0.001216383 | protein_coding |
| ENSG00000015413 | DPEP1    | -1.486156913 | 0.033173684 | protein_coding |
| ENSG00000183793 | NPIPA5   | -1.485798414 | 0.006469214 | protein_coding |
| ENSG00000196683 | TOMM7    | -1.485713848 | 0.000429236 | protein_coding |
| ENSG00000130653 | PNPLA7   | -1.484659843 | 0.002383913 | protein_coding |
| ENSG00000205544 | TMEM256  | -1.484492922 | 0.000656602 | protein_coding |
| ENSG00000163156 | SCNM1    | -1.484453203 | 0.000464144 | protein_coding |
| ENSG00000188290 | HES4     | -1.484151289 | 0.000414045 | protein_coding |
| ENSG00000205670 | SMIM11A  | -1.483318328 | 0.01296303  | protein_coding |
| ENSG00000131495 | NDUFA2   | -1.482088145 | 0.00049504  | protein_coding |
| ENSG00000185189 | NRBP2    | -1.48076292  | 0.000629961 | protein_coding |
| ENSG00000205309 | NT5M     | -1.479633788 | 0.000930458 | protein_coding |
| ENSG00000165698 | SPACA9   | -1.476883277 | 0.001217772 | protein_coding |
| ENSG00000136371 | MTHFS    | -1.476782421 | 0.002474866 | protein_coding |
| ENSG00000107147 | KCNT1    | -1.476331008 | 0.017860441 | protein_coding |
| ENSG00000112667 | DNPH1    | -1.474994878 | 0.000446185 | protein_coding |
| ENSG00000126562 | WNK4     | -1.47357435  | 0.004109782 | protein_coding |
| ENSG00000113196 | HAND1    | -1.473274709 | 0.000537223 | protein_coding |
| ENSG00000165233 | CARD19   | -1.472881525 | 0.000673874 | protein_coding |
| ENSG00000162148 | PPP1R32  | -1.472216885 | 0.006676975 | protein_coding |
| ENSG00000125356 | NDUFA1   | -1.471831609 | 0.00047381  | protein_coding |
| ENSG00000135929 | CYP27A1  | -1.471031328 | 0.008781446 | protein_coding |
| ENSG00000118231 | CRYGD    | -1.468686557 | 0.001770006 | protein_coding |
| ENSG00000196976 | LAGE3    | -1.46827679  | 0.00048094  | protein_coding |
| ENSG00000142871 | CYR61    | -1.467471418 | 0.000566016 | protein_coding |
| ENSG00000105619 | TFPT     | -1.467251953 | 0.00082603  | protein_coding |
| ENSG00000108107 | RPL28    | -1.466520889 | 0.000465637 | protein_coding |
| ENSG00000197982 | C1orf122 | -1.465667505 | 0.000559456 | protein_coding |
| ENSG00000109743 | BST1     | -1.465134476 | 0.041903977 | protein_coding |
| ENSG00000160318 | CLDND2   | -1.465134476 | 0.041903977 | protein_coding |
| ENSG00000185883 | ATP6V0C  | -1.465017117 | 0.000927317 | protein_coding |
| ENSG00000224420 | ADM5     | -1.46492182  | 0.001318982 | protein_coding |

|                 |          |              |             |                |
|-----------------|----------|--------------|-------------|----------------|
| ENSG00000167702 | KIFC2    | -1.464576319 | 0.000628857 | protein_coding |
| ENSG00000176340 | COX8A    | -1.46415266  | 0.000499128 | protein_coding |
| ENSG00000088881 | EBF4     | -1.461864963 | 0.000733422 | protein_coding |
| ENSG00000126458 | RRAS     | -1.46160644  | 0.001575434 | protein_coding |
| ENSG00000203950 | RTL8A    | -1.45945732  | 0.000537625 | protein_coding |
| ENSG00000099377 | HSD3B7   | -1.459019104 | 0.009979849 | protein_coding |
| ENSG00000063177 | RPL18    | -1.458828463 | 0.000493444 | protein_coding |
| ENSG00000184343 | SRPK3    | -1.457981228 | 0.001947286 | protein_coding |
| ENSG00000125813 | PAX1     | -1.457852453 | 0.032778547 | protein_coding |
| ENSG00000180089 | TMEM86B  | -1.457852453 | 0.032778547 | protein_coding |
| ENSG00000242114 | MTFP1    | -1.455832957 | 0.001929017 | protein_coding |
| ENSG00000110719 | TCIRG1   | -1.454899025 | 0.001009041 | protein_coding |
| ENSG00000151651 | ADAM8    | -1.454508048 | 0.002304491 | protein_coding |
| ENSG00000162004 | CCDC78   | -1.453147717 | 0.001141424 | protein_coding |
| ENSG00000162032 | SPSB3    | -1.45260926  | 0.018121122 | protein_coding |
| ENSG00000181029 | TRAPPC5  | -1.45047514  | 0.004891669 | protein_coding |
| ENSG00000125971 | DYNLRB1  | -1.450467735 | 0.000574406 | protein_coding |
| ENSG00000160783 | PMF1     | -1.450250691 | 0.000669127 | protein_coding |
| ENSG00000131094 | C1QL1    | -1.449811911 | 0.000946334 | protein_coding |
| ENSG00000188729 | OSTN     | -1.448899505 | 0.00161946  | protein_coding |
| ENSG00000147123 | NDUFB11  | -1.448014145 | 0.000570403 | protein_coding |
| ENSG00000163923 | RPL39L   | -1.447792284 | 0.000953096 | protein_coding |
| ENSG00000131187 | F12      | -1.446546247 | 0.000832559 | protein_coding |
| ENSG00000167526 | RPL13    | -1.445207593 | 0.000552924 | protein_coding |
| ENSG00000171222 | SCAND1   | -1.442929359 | 0.000668778 | protein_coding |
| ENSG00000130649 | CYP2E1   | -1.442647348 | 0.00241602  | protein_coding |
| ENSG00000225663 | MCRIP1   | -1.44207422  | 0.00064399  | protein_coding |
| ENSG00000125434 | SLC25A35 | -1.442073368 | 0.001655274 | protein_coding |
| ENSG00000158473 | CD1D     | -1.441556097 | 0.005033362 | protein_coding |
| ENSG00000151006 | PRSS53   | -1.440424186 | 0.004816357 | protein_coding |
| ENSG00000246922 | UBAP1L   | -1.439346302 | 0.008470153 | protein_coding |
| ENSG00000100319 | ZMAT5    | -1.438005102 | 0.000947781 | protein_coding |
| ENSG00000173917 | HOXB2    | -1.437799322 | 0.001110202 | protein_coding |
| ENSG00000170634 | ACYP2    | -1.437545924 | 0.002483067 | protein_coding |
| ENSG00000111012 | CYP27B1  | -1.436501877 | 0.001146867 | protein_coding |
| ENSG00000100271 | TTLL1    | -1.436118038 | 0.001392619 | protein_coding |
| ENSG00000075826 | SEC31B   | -1.434650522 | 0.001055181 | protein_coding |
| ENSG00000137100 | DCTN3    | -1.432650576 | 0.000700264 | protein_coding |
| ENSG00000130724 | CHMP2A   | -1.431160474 | 0.000735367 | protein_coding |
| ENSG00000085465 | OVGP1    | -1.429894912 | 0.001224114 | protein_coding |
| ENSG00000173486 | FKBP2    | -1.427509404 | 0.000763876 | protein_coding |
| ENSG00000126524 | SBDS     | -1.425776866 | 0.000783149 | protein_coding |
| ENSG00000116586 | LAMTOR2  | -1.424661734 | 0.000768614 | protein_coding |

|                 |            |              |             |                |
|-----------------|------------|--------------|-------------|----------------|
| ENSG00000006282 | SPATA20    | -1.422111957 | 0.000978713 | protein_coding |
| ENSG00000228594 | FNDC10     | -1.421684359 | 0.00079817  | protein_coding |
| ENSG00000184903 | IMMP2L     | -1.41806425  | 0.003349499 | protein_coding |
| ENSG00000197903 | HIST1H2BK  | -1.417655404 | 0.000859523 | protein_coding |
| ENSG00000136942 | RPL35      | -1.417260715 | 0.000703921 | protein_coding |
| ENSG00000133243 | BTBD2      | -1.41675855  | 0.000735951 | protein_coding |
| ENSG00000105048 | TNNT1      | -1.416676729 | 0.000933168 | protein_coding |
| ENSG00000285043 | AC093512.2 | -1.415547057 | 0.009693408 | protein_coding |
| ENSG00000126432 | PRDX5      | -1.414674515 | 0.000744723 | protein_coding |
| ENSG00000126267 | COX6B1     | -1.411460689 | 0.000785783 | protein_coding |
| ENSG00000183114 | FAM43B     | -1.411005328 | 0.002258129 | protein_coding |
| ENSG00000171786 | NHLH1      | -1.410733295 | 0.040101413 | protein_coding |
| ENSG00000182379 | NXPH4      | -1.410103819 | 0.000963774 | protein_coding |
| ENSG00000163702 | IL17RC     | -1.406564387 | 0.001219274 | protein_coding |
| ENSG00000090238 | YPEL3      | -1.405765192 | 0.001742836 | protein_coding |
| ENSG00000145494 | NDUFS6     | -1.404898875 | 0.00083829  | protein_coding |
| ENSG00000158106 | RHPN1      | -1.404543375 | 0.001032848 | protein_coding |
| ENSG00000059915 | PSD        | -1.404174802 | 0.009889231 | protein_coding |
| ENSG00000240053 | LY6G5B     | -1.403096446 | 0.003220672 | protein_coding |
| ENSG00000183172 | SMDT1      | -1.402578778 | 0.000977262 | protein_coding |
| ENSG00000126768 | TIMM17B    | -1.401424172 | 0.000856325 | protein_coding |
| ENSG00000103253 | HAGHL      | -1.400809585 | 0.001050881 | protein_coding |
| ENSG00000173531 | MST1       | -1.400173326 | 0.001573704 | protein_coding |
| ENSG00000212123 | PRR22      | -1.399047271 | 0.001289165 | protein_coding |
| ENSG00000151778 | SERP2      | -1.398461208 | 0.004047714 | protein_coding |
| ENSG00000146066 | HIGD2A     | -1.396158153 | 0.000958195 | protein_coding |
| ENSG00000162572 | SCNN1D     | -1.396005259 | 0.001810352 | protein_coding |
| ENSG00000185262 | UBALD2     | -1.393471307 | 0.001029758 | protein_coding |
| ENSG00000172037 | LAMB2      | -1.392733149 | 0.000963362 | protein_coding |
| ENSG00000157514 | TSC22D3    | -1.392216186 | 0.000884929 | protein_coding |
| ENSG00000171443 | ZNF524     | -1.39009716  | 0.002036645 | protein_coding |
| ENSG00000102901 | CENPT      | -1.39008504  | 0.000973415 | protein_coding |
| ENSG00000041880 | PARP3      | -1.389987802 | 0.001649724 | protein_coding |
| ENSG00000231500 | RPS18      | -1.389305089 | 0.000886152 | protein_coding |
| ENSG00000149743 | TRPT1      | -1.38879576  | 0.0015099   | protein_coding |
| ENSG00000009950 | MLXIPL     | -1.388034983 | 0.00129015  | protein_coding |
| ENSG00000105223 | PLD3       | -1.387912777 | 0.000937175 | protein_coding |
| ENSG00000104863 | LIN7B      | -1.38737749  | 0.002473919 | protein_coding |
| ENSG00000104859 | CLASRP     | -1.38679681  | 0.000992451 | protein_coding |
| ENSG00000089327 | FXYS5      | -1.386708792 | 0.001193527 | protein_coding |
| ENSG00000169169 | CPT1C      | -1.386270259 | 0.002008881 | protein_coding |
| ENSG00000178531 | CTXN1      | -1.386181324 | 0.001126986 | protein_coding |
| ENSG00000090539 | CHRD       | -1.385419305 | 0.00440473  | protein_coding |

|                 |          |              |             |                |
|-----------------|----------|--------------|-------------|----------------|
| ENSG00000182310 | SPACA6   | -1.385014088 | 0.003531724 | protein_coding |
| ENSG00000178449 | COX14    | -1.383207857 | 0.001209883 | protein_coding |
| ENSG00000179862 | CITED4   | -1.382503926 | 0.003698436 | protein_coding |
| ENSG00000013364 | MVP      | -1.379022547 | 0.002049499 | protein_coding |
| ENSG00000164713 | BRI3     | -1.377706652 | 0.001136919 | protein_coding |
| ENSG00000065621 | GSTO2    | -1.377406221 | 0.002478246 | protein_coding |
| ENSG00000010361 | FUZ      | -1.375847955 | 0.001196592 | protein_coding |
| ENSG00000133250 | ZNF414   | -1.375773952 | 0.001287211 | protein_coding |
| ENSG00000002330 | BAD      | -1.375570562 | 0.001298888 | protein_coding |
| ENSG00000196502 | SULT1A1  | -1.373840932 | 0.002897627 | protein_coding |
| ENSG00000188818 | ZDHHC11  | -1.373840932 | 0.002897627 | protein_coding |
| ENSG00000204248 | COL11A2  | -1.37359296  | 0.006842984 | protein_coding |
| ENSG00000004777 | ARHGAP33 | -1.372818828 | 0.001933081 | protein_coding |
| ENSG00000171159 | C9orf16  | -1.372360547 | 0.001203407 | protein_coding |
| ENSG00000183426 | NPIPA1   | -1.372240917 | 0.002226046 | protein_coding |
| ENSG00000143543 | JTB      | -1.371211763 | 0.00151604  | protein_coding |
| ENSG00000178685 | PARP10   | -1.370430737 | 0.026682384 | protein_coding |
| ENSG00000099795 | NDUFB7   | -1.369124652 | 0.00113534  | protein_coding |
| ENSG00000115226 | FNDC4    | -1.367885676 | 0.001787151 | protein_coding |
| ENSG00000160972 | PPP1R16A | -1.367215854 | 0.001473017 | protein_coding |
| ENSG00000100417 | PMM1     | -1.365865253 | 0.001485799 | protein_coding |
| ENSG00000187118 | CMC1     | -1.365847255 | 0.001517031 | protein_coding |
| ENSG00000034510 | TMSB10   | -1.365775013 | 0.001097412 | protein_coding |
| ENSG00000203778 | FAM229B  | -1.365449213 | 0.001811129 | protein_coding |
| ENSG00000182899 | RPL35A   | -1.365416136 | 0.001087602 | protein_coding |
| ENSG00000173113 | TRMT112  | -1.363576878 | 0.001136297 | protein_coding |
| ENSG00000110148 | CCKBR    | -1.362023091 | 0.049028188 | protein_coding |
| ENSG00000166816 | LDHD     | -1.361871214 | 0.022113468 | protein_coding |
| ENSG00000125744 | RTN2     | -1.361542892 | 0.002021001 | protein_coding |
| ENSG00000143314 | MRPL24   | -1.361176419 | 0.001206495 | protein_coding |
| ENSG00000158062 | UBXN11   | -1.360907022 | 0.001426827 | protein_coding |
| ENSG00000185100 | ADSSL1   | -1.360163992 | 0.002982967 | protein_coding |
| ENSG00000099330 | OCEL1    | -1.359599913 | 0.002359281 | protein_coding |
| ENSG00000100300 | TSPO     | -1.357325871 | 0.001202777 | protein_coding |
| ENSG00000167969 | ECI1     | -1.354714645 | 0.001226619 | protein_coding |
| ENSG00000111716 | LDHB     | -1.354436208 | 0.001290493 | protein_coding |
| ENSG00000105640 | RPL18A   | -1.352461095 | 0.001200879 | protein_coding |
| ENSG00000127419 | TMEM175  | -1.351984329 | 0.001702886 | protein_coding |
| ENSG00000167508 | MVD      | -1.351548501 | 0.001349208 | protein_coding |
| ENSG00000198937 | CCDC167  | -1.351309221 | 0.001540232 | protein_coding |
| ENSG00000129991 | TNNI3    | -1.350074039 | 0.010860269 | protein_coding |
| ENSG00000163064 | EN1      | -1.350035582 | 0.003460177 | protein_coding |
| ENSG00000119227 | PIGZ     | -1.349322788 | 0.008095347 | protein_coding |

|                 |          |              |             |                |
|-----------------|----------|--------------|-------------|----------------|
| ENSG00000104823 | ECH1     | -1.3490256   | 0.001359375 | protein_coding |
| ENSG00000172456 | FGGY     | -1.348826366 | 0.005440345 | protein_coding |
| ENSG00000197757 | HOXC6    | -1.347883091 | 0.001826722 | protein_coding |
| ENSG00000180953 | ST20     | -1.347529739 | 0.009128294 | protein_coding |
| ENSG00000159335 | PTMS     | -1.346832811 | 0.001296777 | protein_coding |
| ENSG00000072778 | ACADVL   | -1.346361777 | 0.001358866 | protein_coding |
| ENSG00000103363 | ELOB     | -1.346165859 | 0.001308455 | protein_coding |
| ENSG00000172183 | ISG20    | -1.345117628 | 0.011889469 | protein_coding |
| ENSG00000225828 | FAM229A  | -1.343918902 | 0.002005095 | protein_coding |
| ENSG00000126467 | TSKS     | -1.343558421 | 0.032778547 | protein_coding |
| ENSG00000105443 | CYTH2    | -1.342024005 | 0.001507714 | protein_coding |
| ENSG00000133134 | BEX2     | -1.341364865 | 0.001481066 | protein_coding |
| ENSG00000105372 | RPS19    | -1.340368151 | 0.001322893 | protein_coding |
| ENSG00000175482 | POLD4    | -1.339363656 | 0.026398783 | protein_coding |
| ENSG00000186648 | CARMIL3  | -1.338082401 | 0.00833992  | protein_coding |
| ENSG00000198546 | ZNF511   | -1.337895684 | 0.001829747 | protein_coding |
| ENSG00000127152 | BCL11B   | -1.336578515 | 0.004969131 | protein_coding |
| ENSG00000197558 | SSPO     | -1.336230426 | 0.00351424  | protein_coding |
| ENSG00000198003 | CCDC151  | -1.336067689 | 0.009997001 | protein_coding |
| ENSG00000188747 | NOXA1    | -1.335337672 | 0.00249085  | protein_coding |
| ENSG00000099797 | TECR     | -1.335089869 | 0.001429955 | protein_coding |
| ENSG00000228474 | OST4     | -1.334914745 | 0.001556795 | protein_coding |
| ENSG00000105519 | CAPS     | -1.334811061 | 0.009396064 | protein_coding |
| ENSG00000228439 | TSTD3    | -1.334370282 | 0.016452689 | protein_coding |
| ENSG00000115286 | NDUFS7   | -1.332925607 | 0.001661903 | protein_coding |
| ENSG00000160213 | CSTB     | -1.332511324 | 0.001506865 | protein_coding |
| ENSG00000167619 | TMEM145  | -1.331225384 | 0.002977635 | protein_coding |
| ENSG00000123689 | G0S2     | -1.32780817  | 0.0070897   | protein_coding |
| ENSG00000130313 | PGLS     | -1.327746553 | 0.001707925 | protein_coding |
| ENSG00000197093 | GAL3ST4  | -1.327516702 | 0.032364314 | protein_coding |
| ENSG00000100246 | DNAL4    | -1.327382612 | 0.002144444 | protein_coding |
| ENSG00000106211 | HSPB1    | -1.326538494 | 0.001670738 | protein_coding |
| ENSG00000124587 | PEX6     | -1.326008792 | 0.00245964  | protein_coding |
| ENSG00000078804 | TP53INP2 | -1.324968116 | 0.003020308 | protein_coding |
| ENSG00000196998 | WDR45    | -1.324477683 | 0.001754918 | protein_coding |
| ENSG00000228300 | C19orf24 | -1.323602912 | 0.001722139 | protein_coding |
| ENSG00000184470 | TXNRD2   | -1.323568961 | 0.001649686 | protein_coding |
| ENSG00000110711 | AIP      | -1.322494641 | 0.001664892 | protein_coding |
| ENSG00000074842 | MYDGF    | -1.322048935 | 0.001598872 | protein_coding |
| ENSG00000131584 | ACAP3    | -1.321691824 | 0.001705969 | protein_coding |
| ENSG00000160284 | SPATC1L  | -1.320370408 | 0.00227673  | protein_coding |
| ENSG00000163132 | MSX1     | -1.319965821 | 0.001725416 | protein_coding |
| ENSG00000169733 | RFNG     | -1.319848975 | 0.001831818 | protein_coding |

|                 |           |              |             |                |
|-----------------|-----------|--------------|-------------|----------------|
| ENSG00000103723 | AP3B2     | -1.316984346 | 0.004241204 | protein_coding |
| ENSG00000204618 | RNF39     | -1.316218315 | 0.016632924 | protein_coding |
| ENSG00000241360 | PDXP      | -1.316090887 | 0.001867228 | protein_coding |
| ENSG00000127922 | SEM1      | -1.315498708 | 0.001736597 | protein_coding |
| ENSG00000175287 | PHYHD1    | -1.313897363 | 0.002049816 | protein_coding |
| ENSG00000051523 | CYBA      | -1.313707131 | 0.001734256 | protein_coding |
| ENSG00000167397 | VKORC1    | -1.311639937 | 0.002763684 | protein_coding |
| ENSG00000158552 | ZFAND2B   | -1.311467302 | 0.002144375 | protein_coding |
| ENSG00000132432 | SEC61G    | -1.310834946 | 0.001798407 | protein_coding |
| ENSG00000184897 | H1FX      | -1.310714249 | 0.001727495 | protein_coding |
| ENSG00000184489 | PTP4A3    | -1.310460917 | 0.002187542 | protein_coding |
| ENSG00000166136 | NDUFB8    | -1.310049138 | 0.002335168 | protein_coding |
| ENSG00000167797 | CDK2AP2   | -1.309935656 | 0.002168281 | protein_coding |
| ENSG00000169660 | HEXDC     | -1.309931195 | 0.002209902 | protein_coding |
| ENSG00000159753 | CARMIL2   | -1.308428692 | 0.00249193  | protein_coding |
| ENSG00000204308 | RNF5      | -1.308317693 | 0.001851853 | protein_coding |
| ENSG00000131408 | NR1H2     | -1.307543519 | 0.002170773 | protein_coding |
| ENSG00000142173 | COL6A2    | -1.307076411 | 0.001969687 | protein_coding |
| ENSG00000167283 | ATP5MG    | -1.306823991 | 0.002141126 | protein_coding |
| ENSG00000198832 | SELENOM   | -1.30678162  | 0.002061259 | protein_coding |
| ENSG00000146707 | POMZP3    | -1.306421433 | 0.018991473 | protein_coding |
| ENSG00000134590 | RTL8C     | -1.30638105  | 0.001878646 | protein_coding |
| ENSG00000102109 | PCSK1N    | -1.30268501  | 0.002015555 | protein_coding |
| ENSG00000188760 | TMEM198   | -1.30268071  | 0.002714644 | protein_coding |
| ENSG00000161016 | RPL8      | -1.302060932 | 0.001790414 | protein_coding |
| ENSG00000143977 | SNRPG     | -1.301877411 | 0.001905477 | protein_coding |
| ENSG00000270170 | NCBP2-AS2 | -1.301387403 | 0.002443051 | protein_coding |
| ENSG00000213654 | GPSM3     | -1.301012997 | 0.031520396 | protein_coding |
| ENSG00000114315 | HES1      | -1.299491529 | 0.002099796 | protein_coding |
| ENSG00000140682 | TGFB1I1   | -1.297339543 | 0.010823137 | protein_coding |
| ENSG00000130332 | LSM7      | -1.296639748 | 0.00195681  | protein_coding |
| ENSG00000133315 | MACROD1   | -1.294152362 | 0.002068481 | protein_coding |
| ENSG00000166823 | MESP1     | -1.292712658 | 0.00445551  | protein_coding |
| ENSG00000167565 | SERTAD3   | -1.292402627 | 0.00296135  | protein_coding |
| ENSG00000178026 | LRRC75B   | -1.291643484 | 0.00355062  | protein_coding |
| ENSG00000091592 | NLRP1     | -1.291592706 | 0.003496573 | protein_coding |
| ENSG00000165507 | DEPP1     | -1.29072748  | 0.0074743   | protein_coding |
| ENSG00000188338 | SLC38A3   | -1.290238759 | 0.003857405 | protein_coding |
| ENSG00000115268 | RPS15     | -1.29009395  | 0.001972643 | protein_coding |
| ENSG00000142089 | IFITM3    | -1.28993864  | 0.031103696 | protein_coding |
| ENSG00000112699 | GMDS      | -1.289059514 | 0.002438384 | protein_coding |
| ENSG00000241837 | ATP5PO    | -1.288667029 | 0.00225294  | protein_coding |
| ENSG00000149257 | SERPINH1  | -1.287494928 | 0.002145153 | protein_coding |



|                 |           |              |             |                |
|-----------------|-----------|--------------|-------------|----------------|
| ENSG00000172663 | TMEM134   | -1.287472938 | 0.002700642 | protein_coding |
| ENSG00000233822 | HIST1H2BN | -1.284860959 | 0.015253738 | protein_coding |
| ENSG00000042753 | AP2S1     | -1.28423561  | 0.002140241 | protein_coding |
| ENSG00000173511 | VEGFB     | -1.283570187 | 0.002518725 | protein_coding |
| ENSG00000047662 | FAM184B   | -1.28328692  | 0.039238489 | protein_coding |
| ENSG00000141744 | PNMT      | -1.28328692  | 0.039238489 | protein_coding |
| ENSG00000180573 | HIST1H2AC | -1.283114448 | 0.019044598 | protein_coding |
| ENSG00000134107 | BHLHE40   | -1.282422315 | 0.002674002 | protein_coding |
| ENSG00000163536 | SERPINI1  | -1.281593005 | 0.011863208 | protein_coding |
| ENSG00000100092 | SH3BP1    | -1.281467979 | 0.00542632  | protein_coding |
| ENSG00000204228 | HSD17B8   | -1.281073037 | 0.005068057 | protein_coding |
| ENSG00000137070 | IL11RA    | -1.280189322 | 0.004134325 | protein_coding |
| ENSG00000100982 | PCIF1     | -1.278678986 | 0.002372785 | protein_coding |
| ENSG00000204387 | C6orf48   | -1.278436284 | 0.002440842 | protein_coding |
| ENSG00000147813 | NAPRT     | -1.27831005  | 0.003742182 | protein_coding |
| ENSG00000149489 | ROM1      | -1.277920426 | 0.021919674 | protein_coding |
| ENSG00000105193 | RPS16     | -1.276759906 | 0.00219424  | protein_coding |
| ENSG00000145945 | FAM50B    | -1.276572614 | 0.00352447  | protein_coding |
| ENSG00000223802 | CERS1     | -1.275971635 | 0.00524849  | protein_coding |
| ENSG00000166171 | DPCD      | -1.27559526  | 0.002783055 | protein_coding |
| ENSG00000137720 | C11orf1   | -1.272816125 | 0.004488797 | protein_coding |
| ENSG00000131116 | ZNF428    | -1.272765197 | 0.002489215 | protein_coding |
| ENSG00000102125 | TAZ       | -1.271630814 | 0.002540044 | protein_coding |
| ENSG00000232112 | TMA7      | -1.271276724 | 0.002665321 | protein_coding |
| ENSG00000131652 | THOC6     | -1.270684321 | 0.002480298 | protein_coding |
| ENSG00000039650 | PNKP      | -1.269586892 | 0.002606505 | protein_coding |
| ENSG00000173918 | C1QTNF1   | -1.268823253 | 0.004610118 | protein_coding |
| ENSG00000092621 | PHGDH     | -1.268779431 | 0.002335568 | protein_coding |
| ENSG00000234965 | SHISA8    | -1.268772352 | 0.004176455 | protein_coding |
| ENSG00000213347 | MXD3      | -1.266802769 | 0.00293064  | protein_coding |
| ENSG00000171223 | JUNB      | -1.266727789 | 0.003248398 | protein_coding |
| ENSG00000205542 | TMSB4X    | -1.265366186 | 0.003058144 | protein_coding |
| ENSG00000100142 | POLR2F    | -1.265038051 | 0.002494622 | protein_coding |
| ENSG00000134248 | LAMTOR5   | -1.264479237 | 0.002651022 | protein_coding |
| ENSG00000099385 | BCL7C     | -1.263321794 | 0.002713189 | protein_coding |
| ENSG00000118640 | VAMP8     | -1.262871297 | 0.004354816 | protein_coding |
| ENSG00000161395 | PGAP3     | -1.262224487 | 0.003399879 | protein_coding |
| ENSG00000185386 | MAPK11    | -1.260619741 | 0.004293054 | protein_coding |
| ENSG00000170412 | GPRC5C    | -1.259253371 | 0.004459107 | protein_coding |
| ENSG00000102904 | TSNAXIP1  | -1.259116054 | 0.019024949 | protein_coding |
| ENSG00000174851 | YIF1A     | -1.257461652 | 0.002714502 | protein_coding |
| ENSG00000167311 | ART5      | -1.256646262 | 0.007994347 | protein_coding |
| ENSG00000142544 | CTU1      | -1.255265322 | 0.003162525 | protein_coding |

|                 |           |              |             |                |
|-----------------|-----------|--------------|-------------|----------------|
| ENSG00000160799 | CCDC12    | -1.255063671 | 0.002988949 | protein_coding |
| ENSG00000198816 | ZNF358    | -1.254860389 | 0.003121961 | protein_coding |
| ENSG00000176101 | SSNA1     | -1.254851019 | 0.002720046 | protein_coding |
| ENSG00000138085 | ATRAID    | -1.254175249 | 0.002863858 | protein_coding |
| ENSG00000147889 | CDKN2A    | -1.253988315 | 0.002638051 | protein_coding |
| ENSG00000106333 | PCOLCE    | -1.253814241 | 0.004510333 | protein_coding |
| ENSG00000120896 | SORBS3    | -1.253344517 | 0.00307386  | protein_coding |
| ENSG00000066379 | ZNRD1     | -1.253199904 | 0.003935473 | protein_coding |
| ENSG00000005448 | WDR54     | -1.251938335 | 0.003142383 | protein_coding |
| ENSG00000237489 | C10orf143 | -1.251854782 | 0.021631495 | protein_coding |
| ENSG00000107872 | FBXL15    | -1.251762912 | 0.003513312 | protein_coding |
| ENSG00000175573 | C11orf68  | -1.250567293 | 0.003322476 | protein_coding |
| ENSG00000183828 | NUDT14    | -1.250330957 | 0.003638683 | protein_coding |
| ENSG00000211450 | SELENOH   | -1.250321461 | 0.002858921 | protein_coding |
| ENSG00000204710 | SPDYC     | -1.250048799 | 0.006576598 | protein_coding |
| ENSG00000117691 | NENF      | -1.249279624 | 0.002895825 | protein_coding |
| ENSG00000185988 | PLK5      | -1.24897185  | 0.007158799 | protein_coding |
| ENSG00000149679 | CABLES2   | -1.248112768 | 0.003720281 | protein_coding |
| ENSG00000105204 | DYRK1B    | -1.248112768 | 0.003720281 | protein_coding |
| ENSG00000149932 | TMEM219   | -1.248062065 | 0.003065276 | protein_coding |
| ENSG00000141933 | TPGS1     | -1.248000819 | 0.004038311 | protein_coding |
| ENSG00000168894 | RNF181    | -1.246236393 | 0.003330122 | protein_coding |
| ENSG00000198818 | SFT2D1    | -1.24615356  | 0.003150241 | protein_coding |
| ENSG00000153391 | INO80C    | -1.245429601 | 0.003821322 | protein_coding |
| ENSG00000170296 | GABARAP   | -1.244989964 | 0.011287195 | protein_coding |
| ENSG00000141376 | BCAS3     | -1.244596205 | 0.003449403 | protein_coding |
| ENSG00000213889 | PPM1N     | -1.244534985 | 0.00687511  | protein_coding |
| ENSG00000127838 | PNKD      | -1.244357954 | 0.003116729 | protein_coding |
| ENSG00000175193 | PARL      | -1.2432536   | 0.006974979 | protein_coding |
| ENSG00000104979 | C19orf53  | -1.242058159 | 0.003023384 | protein_coding |
| ENSG00000170801 | HTRA3     | -1.240996594 | 0.004550747 | protein_coding |
| ENSG00000125734 | GPR108    | -1.240754657 | 0.003368489 | protein_coding |
| ENSG00000154710 | RABGEF1   | -1.239933552 | 0.007582972 | protein_coding |
| ENSG00000120129 | DUSP1     | -1.2393406   | 0.003144475 | protein_coding |
| ENSG00000125835 | SNRPB     | -1.238130315 | 0.002973362 | protein_coding |
| ENSG00000100276 | RASL10A   | -1.23765815  | 0.04754413  | protein_coding |
| ENSG00000230510 | PPP5D1    | -1.237217571 | 0.035481962 | protein_coding |
| ENSG00000236104 | ZBTB22    | -1.237194613 | 0.003723724 | protein_coding |
| ENSG00000213563 | C8orf82   | -1.236891016 | 0.003329035 | protein_coding |
| ENSG00000198417 | MT1F      | -1.236790034 | 0.021394294 | protein_coding |
| ENSG00000092010 | PSME1     | -1.236597666 | 0.00360384  | protein_coding |
| ENSG00000099958 | DERL3     | -1.23634354  | 0.009068762 | protein_coding |
| ENSG00000167799 | NUDT8     | -1.235256848 | 0.005184026 | protein_coding |

|                 |            |              |             |                |
|-----------------|------------|--------------|-------------|----------------|
| ENSG00000142632 | ARHGEF19   | -1.233591952 | 0.012195035 | protein_coding |
| ENSG00000142449 | FBN3       | -1.230630728 | 0.034842559 | protein_coding |
| ENSG00000065029 | ZNF76      | -1.23050851  | 0.003525541 | protein_coding |
| ENSG00000114395 | CYB561D2   | -1.230172001 | 0.004457902 | protein_coding |
| ENSG00000188186 | LAMTOR4    | -1.229295451 | 0.003359519 | protein_coding |
| ENSG00000090013 | BLVRB      | -1.228576039 | 0.003898147 | protein_coding |
| ENSG00000197483 | ZNF628     | -1.228498381 | 0.004496722 | protein_coding |
| ENSG00000126254 | RBM42      | -1.228202883 | 0.00328784  | protein_coding |
| ENSG00000204498 | NFKBIL1    | -1.228171635 | 0.004112839 | protein_coding |
| ENSG00000114626 | ABTB1      | -1.2279636   | 0.007643605 | protein_coding |
| ENSG00000168010 | ATG16L2    | -1.227856887 | 0.005354677 | protein_coding |
| ENSG00000127952 | STYXL1     | -1.2276305   | 0.004731238 | protein_coding |
| ENSG00000067836 | ROGDI      | -1.226686592 | 0.005590184 | protein_coding |
| ENSG00000122026 | RPL21      | -1.226554136 | 0.003243142 | protein_coding |
| ENSG00000101439 | CST3       | -1.225821395 | 0.003413545 | protein_coding |
| ENSG00000173207 | CKS1B      | -1.22545728  | 0.003395614 | protein_coding |
| ENSG00000169231 | THBS3      | -1.224137479 | 0.007333432 | protein_coding |
| ENSG00000148985 | PGAP2      | -1.223326941 | 0.004609656 | protein_coding |
| ENSG00000160226 | CFAP410    | -1.222972827 | 0.004599822 | protein_coding |
| ENSG00000132581 | SDF2       | -1.22257669  | 0.004692524 | protein_coding |
| ENSG00000102977 | ACD        | -1.222559633 | 0.00399107  | protein_coding |
| ENSG00000229809 | ZNF688     | -1.220536665 | 0.005796594 | protein_coding |
| ENSG00000183648 | NDUFB1     | -1.22048097  | 0.0039924   | protein_coding |
| ENSG00000213523 | SRA1       | -1.22048097  | 0.0039924   | protein_coding |
| ENSG00000101986 | ABCD1      | -1.220188002 | 0.004525199 | protein_coding |
| ENSG00000120068 | HOXB8      | -1.2196637   | 0.004342042 | protein_coding |
| ENSG00000158825 | CDA        | -1.218058409 | 0.024220592 | protein_coding |
| ENSG00000105617 | LENG1      | -1.217838385 | 0.006465983 | protein_coding |
| ENSG00000162585 | FAAP20     | -1.217345086 | 0.004009569 | protein_coding |
| ENSG00000002822 | MAD1L1     | -1.21663422  | 0.00396942  | protein_coding |
| ENSG00000175550 | DRAP1      | -1.216111618 | 0.003683287 | protein_coding |
| ENSG00000246705 | H2AFJ      | -1.215623196 | 0.00599004  | protein_coding |
| ENSG00000164414 | SLC35A1    | -1.215596637 | 0.010052987 | protein_coding |
| ENSG00000117308 | GALE       | -1.214298569 | 0.004495377 | protein_coding |
| ENSG00000121900 | TMEM54     | -1.212964001 | 0.006907013 | protein_coding |
| ENSG00000049089 | COL9A2     | -1.21142499  | 0.014307373 | protein_coding |
| ENSG00000162076 | FLYWCH2    | -1.210864654 | 0.004327507 | protein_coding |
| ENSG00000187601 | MAGEH1     | -1.210002631 | 0.011940437 | protein_coding |
| ENSG00000277400 | AC145212.1 | -1.209541842 | 0.02851012  | protein_coding |
| ENSG00000172382 | PRSS27     | -1.209513365 | 0.009143534 | protein_coding |
| ENSG00000164306 | PRIMPOL    | -1.208090982 | 0.007150876 | protein_coding |
| ENSG00000198723 | TEX45      | -1.208081448 | 0.042571852 | protein_coding |
| ENSG00000125743 | SNRPD2     | -1.207458705 | 0.003778878 | protein_coding |

|                 |          |              |             |                |
|-----------------|----------|--------------|-------------|----------------|
| ENSG00000110717 | NDUFS8   | -1.207382932 | 0.00384271  | protein_coding |
| ENSG00000167815 | PRDX2    | -1.205681981 | 0.003815916 | protein_coding |
| ENSG00000110628 | SLC22A18 | -1.205333297 | 0.012603554 | protein_coding |
| ENSG00000105669 | COPE     | -1.204742481 | 0.003979527 | protein_coding |
| ENSG00000164587 | RPS14    | -1.2037434   | 0.003816678 | protein_coding |
| ENSG00000104946 | TBC1D17  | -1.203501613 | 0.004929066 | protein_coding |
| ENSG00000182324 | KCNJ14   | -1.202723462 | 0.012174901 | protein_coding |
| ENSG00000066248 | NGEF     | -1.202542368 | 0.00642467  | protein_coding |
| ENSG00000110697 | PITPNM1  | -1.200402038 | 0.004655614 | protein_coding |
| ENSG00000173915 | ATP5MD   | -1.199500614 | 0.004194732 | protein_coding |
| ENSG00000112514 | CUTA     | -1.199286492 | 0.00412699  | protein_coding |
| ENSG00000099625 | CBARP    | -1.198988643 | 0.006050715 | protein_coding |
| ENSG00000161996 | WDR90    | -1.198544821 | 0.004251308 | protein_coding |
| ENSG00000172590 | MRPL52   | -1.198510129 | 0.004291818 | protein_coding |
| ENSG00000123349 | PFDN5    | -1.19728004  | 0.004183408 | protein_coding |
| ENSG00000129038 | LOXL1    | -1.197065454 | 0.007677452 | protein_coding |
| ENSG00000248487 | ABHD14A  | -1.195816461 | 0.008817052 | protein_coding |
| ENSG00000170291 | ELP5     | -1.194672181 | 0.004376164 | protein_coding |
| ENSG00000165949 | IFI27    | -1.193327143 | 0.015683452 | protein_coding |
| ENSG00000084234 | APLP2    | -1.193117285 | 0.004168628 | protein_coding |
| ENSG00000132004 | FBXW9    | -1.191209976 | 0.005440864 | protein_coding |
| ENSG00000064490 | RFXANK   | -1.190834435 | 0.0047132   | protein_coding |
| ENSG00000105419 | MEIS3    | -1.190800833 | 0.005297412 | protein_coding |
| ENSG00000178149 | DALRD3   | -1.19076876  | 0.005810382 | protein_coding |
| ENSG00000106399 | RPA3     | -1.189119461 | 0.004795079 | protein_coding |
| ENSG00000260456 | C16orf95 | -1.187344084 | 0.015760642 | protein_coding |
| ENSG00000107281 | NPDC1    | -1.186175898 | 0.004916932 | protein_coding |
| ENSG00000091640 | SPAG7    | -1.185450043 | 0.005033306 | protein_coding |
| ENSG00000110011 | DNAJC4   | -1.184907807 | 0.006802961 | protein_coding |
| ENSG00000090266 | NDUFB2   | -1.184804514 | 0.004653731 | protein_coding |
| ENSG00000126709 | IFI6     | -1.184481367 | 0.010713731 | protein_coding |
| ENSG00000103227 | LMF1     | -1.183464274 | 0.006819575 | protein_coding |
| ENSG00000170860 | LSM3     | -1.183225621 | 0.00469844  | protein_coding |
| ENSG00000173163 | COMMD1   | -1.18301165  | 0.008164549 | protein_coding |
| ENSG00000179922 | ZNF784   | -1.182950789 | 0.006452018 | protein_coding |
| ENSG00000232859 | LYRM9    | -1.182674389 | 0.026300005 | protein_coding |
| ENSG00000115289 | PCGF1    | -1.180459018 | 0.006277645 | protein_coding |
| ENSG00000186998 | EMID1    | -1.180419749 | 0.006541573 | protein_coding |
| ENSG00000065717 | TLE2     | -1.179965149 | 0.006094247 | protein_coding |
| ENSG00000125458 | NT5C     | -1.179826091 | 0.005499836 | protein_coding |
| ENSG00000182195 | LDOC1    | -1.178897596 | 0.005568311 | protein_coding |
| ENSG00000104897 | SF3A2    | -1.178646247 | 0.004784026 | protein_coding |
| ENSG00000103254 | FAM173A  | -1.178448997 | 0.005464485 | protein_coding |

|                 |           |              |             |                |
|-----------------|-----------|--------------|-------------|----------------|
| ENSG00000168890 | TMEM150A  | -1.17838779  | 0.008971824 | protein_coding |
| ENSG00000241404 | EGFL8     | -1.177873117 | 0.025850844 | protein_coding |
| ENSG00000135473 | PAN2      | -1.176422803 | 0.005291361 | protein_coding |
| ENSG00000105516 | DBP       | -1.176354975 | 0.006414892 | protein_coding |
| ENSG00000149131 | SERPING1  | -1.175396961 | 0.031655681 | protein_coding |
| ENSG00000174428 | GTF2IRD2B | -1.174495226 | 0.010081102 | protein_coding |
| ENSG00000167107 | ACSF2     | -1.174488473 | 0.005909755 | protein_coding |
| ENSG00000141504 | SAT2      | -1.172783418 | 0.005971072 | protein_coding |
| ENSG00000182264 | IZUMO1    | -1.172632957 | 0.031215974 | protein_coding |
| ENSG00000149273 | RPS3      | -1.171759405 | 0.004823711 | protein_coding |
| ENSG00000178096 | BOLA1     | -1.171285344 | 0.006744312 | protein_coding |
| ENSG00000053918 | KCNQ1     | -1.171032051 | 0.017130461 | protein_coding |
| ENSG00000063854 | HAGH      | -1.170767108 | 0.005769143 | protein_coding |
| ENSG00000128709 | HOXD9     | -1.170383739 | 0.006336435 | protein_coding |
| ENSG00000104808 | DHDH      | -1.170060723 | 0.030798047 | protein_coding |
| ENSG00000150779 | TIMM8B    | -1.169116989 | 0.00536684  | protein_coding |
| ENSG00000188486 | H2AFX     | -1.168696941 | 0.005021877 | protein_coding |
| ENSG00000178896 | EXOSC4    | -1.168539299 | 0.0057474   | protein_coding |
| ENSG00000104835 | SARS2     | -1.168506097 | 0.010437524 | protein_coding |
| ENSG00000077463 | SIRT6     | -1.168142564 | 0.005900545 | protein_coding |
| ENSG00000135390 | ATP5MC2   | -1.167667017 | 0.005073893 | protein_coding |
| ENSG00000204922 | UQCC3     | -1.167123012 | 0.006385895 | protein_coding |
| ENSG00000170889 | RPS9      | -1.167062124 | 0.005001521 | protein_coding |
| ENSG00000178623 | GPR35     | -1.167034997 | 0.048597149 | protein_coding |
| ENSG00000004838 | ZMYND10   | -1.167034997 | 0.048597149 | protein_coding |
| ENSG00000105373 | NOP53     | -1.166631325 | 0.005080624 | protein_coding |
| ENSG00000123810 | B9D2      | -1.164974323 | 0.014980637 | protein_coding |
| ENSG00000173846 | PLK3      | -1.164974323 | 0.014980637 | protein_coding |
| ENSG00000102796 | DHRS12    | -1.164663695 | 0.022421406 | protein_coding |
| ENSG00000158164 | TMSB15A   | -1.16394438  | 0.015000965 | protein_coding |
| ENSG00000131471 | AOC3      | -1.163017731 | 0.015888096 | protein_coding |
| ENSG00000122971 | ACADS     | -1.161266914 | 0.006517531 | protein_coding |
| ENSG00000086506 | HBQ1      | -1.161239539 | 0.009377543 | protein_coding |
| ENSG00000139625 | MAP3K12   | -1.161104939 | 0.00965497  | protein_coding |
| ENSG00000241370 | RPP21     | -1.160682637 | 0.045931264 | protein_coding |
| ENSG00000228672 | PROB1     | -1.160146591 | 0.008038774 | protein_coding |
| ENSG00000268916 | CSAG3     | -1.159639782 | 0.015926495 | protein_coding |
| ENSG00000267796 | LIN37     | -1.159480726 | 0.028988998 | protein_coding |
| ENSG00000149806 | FAU       | -1.158925585 | 0.005356791 | protein_coding |
| ENSG00000174871 | CNIH2     | -1.158917654 | 0.018649935 | protein_coding |
| ENSG00000099624 | ATP5F1D   | -1.158596017 | 0.005475974 | protein_coding |
| ENSG00000171984 | SHLD1     | -1.158591028 | 0.015937655 | protein_coding |
| ENSG00000127184 | COX7C     | -1.158343194 | 0.005398425 | protein_coding |

|                 |          |              |             |                |
|-----------------|----------|--------------|-------------|----------------|
| ENSG00000182511 | FES      | -1.157928361 | 0.044743519 | protein_coding |
| ENSG00000131143 | COX4I1   | -1.157442947 | 0.005428244 | protein_coding |
| ENSG00000167549 | CORO6    | -1.15742793  | 0.007617721 | protein_coding |
| ENSG00000164081 | TEX264   | -1.156752798 | 0.005704979 | protein_coding |
| ENSG00000068001 | HYAL2    | -1.156701926 | 0.006114789 | protein_coding |
| ENSG00000173928 | SWSAP1   | -1.155934966 | 0.012735494 | protein_coding |
| ENSG00000167513 | CDT1     | -1.155580367 | 0.005546015 | protein_coding |
| ENSG00000108518 | PFN1     | -1.155162844 | 0.005485595 | protein_coding |
| ENSG00000187796 | CARD9    | -1.154732585 | 0.015975477 | protein_coding |
| ENSG00000165644 | COMTD1   | -1.154502796 | 0.006085334 | protein_coding |
| ENSG00000115350 | POLE4    | -1.154099625 | 0.006370479 | protein_coding |
| ENSG00000105393 | BABAM1   | -1.15388562  | 0.006525479 | protein_coding |
| ENSG00000214026 | MRPL23   | -1.153744762 | 0.006039387 | protein_coding |
| ENSG00000095906 | NUBP2    | -1.152918258 | 0.005728528 | protein_coding |
| ENSG00000152669 | CCNO     | -1.152370233 | 0.012115752 | protein_coding |
| ENSG00000105655 | ISYNA1   | -1.151019114 | 0.005761411 | protein_coding |
| ENSG00000159761 | C16orf86 | -1.150957335 | 0.036582079 | protein_coding |
| ENSG00000169696 | ASPSR1   | -1.150936647 | 0.006405576 | protein_coding |
| ENSG00000157379 | DHRS1    | -1.150393635 | 0.008587569 | protein_coding |
| ENSG00000163040 | CCDC74A  | -1.150367507 | 0.007528712 | protein_coding |
| ENSG00000110076 | NRXN2    | -1.150299344 | 0.012357251 | protein_coding |
| ENSG00000137106 | GRHPR    | -1.148520826 | 0.00594037  | protein_coding |
| ENSG00000114923 | SLC4A3   | -1.14805049  | 0.011849192 | protein_coding |
| ENSG00000163170 | BOLA3    | -1.147273884 | 0.006628342 | protein_coding |
| ENSG00000099866 | MADCAM1  | -1.147152318 | 0.035303813 | protein_coding |
| ENSG00000141574 | SECTM1   | -1.146428706 | 0.017086892 | protein_coding |
| ENSG00000161618 | ALDH16A1 | -1.145922302 | 0.006690849 | protein_coding |
| ENSG00000173992 | CCS      | -1.145878773 | 0.00724784  | protein_coding |
| ENSG00000163703 | CRELD1   | -1.144207101 | 0.008876724 | protein_coding |
| ENSG00000186468 | RPS23    | -1.143867343 | 0.005967196 | protein_coding |
| ENSG00000167646 | DNAAF3   | -1.142337563 | 0.01086116  | protein_coding |
| ENSG00000132016 | C19orf57 | -1.14203933  | 0.008906977 | protein_coding |
| ENSG00000140691 | ARMC5    | -1.141768212 | 0.007687602 | protein_coding |
| ENSG00000169035 | KLK7     | -1.140987817 | 0.033145797 | protein_coding |
| ENSG00000133027 | PEMT     | -1.140248893 | 0.006998752 | protein_coding |
| ENSG00000129158 | SERGEF   | -1.139468477 | 0.008138967 | protein_coding |
| ENSG00000171119 | NRTN     | -1.13858975  | 0.009884901 | protein_coding |
| ENSG00000197114 | ZGPAT    | -1.137189736 | 0.010953087 | protein_coding |
| ENSG00000177556 | ATOX1    | -1.137005326 | 0.007192565 | protein_coding |
| ENSG00000168701 | TMEM208  | -1.135890867 | 0.007161565 | protein_coding |
| ENSG00000174460 | ZCCHC12  | -1.134909863 | 0.007716546 | protein_coding |
| ENSG00000114388 | NPRL2    | -1.134615485 | 0.007554192 | protein_coding |
| ENSG00000084764 | MAPRE3   | -1.134314938 | 0.009590027 | protein_coding |

|                 |          |              |             |                |
|-----------------|----------|--------------|-------------|----------------|
| ENSG00000101473 | ACOT8    | -1.133994316 | 0.007996007 | protein_coding |
| ENSG00000106268 | NUDT1    | -1.133703376 | 0.007530418 | protein_coding |
| ENSG00000142227 | EMP3     | -1.133123221 | 0.010323124 | protein_coding |
| ENSG00000169567 | HINT1    | -1.13286702  | 0.006554662 | protein_coding |
| ENSG00000167770 | OTUB1    | -1.132784928 | 0.006588752 | protein_coding |
| ENSG00000167615 | LENG8    | -1.132582506 | 0.006561791 | protein_coding |
| ENSG00000137404 | NRM      | -1.132413002 | 0.008154573 | protein_coding |
| ENSG00000184076 | UQCR10   | -1.132007667 | 0.006748972 | protein_coding |
| ENSG00000161992 | PRR35    | -1.131854106 | 0.018217997 | protein_coding |
| ENSG00000105518 | TMEM205  | -1.131504172 | 0.010526643 | protein_coding |
| ENSG00000117262 | GPR89A   | -1.13086606  | 0.009249524 | protein_coding |
| ENSG00000127586 | CHTF18   | -1.130445125 | 0.006767134 | protein_coding |
| ENSG00000158019 | BABAM2   | -1.130290452 | 0.007475502 | protein_coding |
| ENSG00000092758 | COL9A3   | -1.130122671 | 0.010735251 | protein_coding |
| ENSG00000131435 | PDLIM4   | -1.129437262 | 0.010491154 | protein_coding |
| ENSG00000176428 | VPS37D   | -1.129392403 | 0.013935477 | protein_coding |
| ENSG00000161328 | LRRC56   | -1.12928275  | 0.022310375 | protein_coding |
| ENSG00000100968 | NFATC4   | -1.129220142 | 0.008108579 | protein_coding |
| ENSG00000167281 | RBFOX3   | -1.128303874 | 0.009892358 | protein_coding |
| ENSG00000105248 | YJU2     | -1.128131433 | 0.007683123 | protein_coding |
| ENSG00000101457 | DNTTIP1  | -1.127969886 | 0.007302316 | protein_coding |
| ENSG00000213465 | ARL2     | -1.127425462 | 0.007390414 | protein_coding |
| ENSG00000130758 | MAP3K10  | -1.127158036 | 0.007616206 | protein_coding |
| ENSG00000183963 | SMTN     | -1.126767919 | 0.008093463 | protein_coding |
| ENSG00000177548 | RABEP2   | -1.126269669 | 0.008779467 | protein_coding |
| ENSG00000054392 | HHAT     | -1.125554573 | 0.021709332 | protein_coding |
| ENSG00000179526 | SHARPIN  | -1.12544649  | 0.007719282 | protein_coding |
| ENSG00000168994 | PXDC1    | -1.125172382 | 0.011848749 | protein_coding |
| ENSG00000130811 | EIF3G    | -1.124971848 | 0.006877047 | protein_coding |
| ENSG00000167468 | GPX4     | -1.124935933 | 0.006837913 | protein_coding |
| ENSG00000140474 | ULK3     | -1.124925753 | 0.007068285 | protein_coding |
| ENSG00000243147 | MRPL33   | -1.124527545 | 0.007940942 | protein_coding |
| ENSG00000150630 | VEGFC    | -1.124016563 | 0.042612006 | protein_coding |
| ENSG00000129194 | SOX15    | -1.124009494 | 0.019893    | protein_coding |
| ENSG00000065057 | NTHL1    | -1.123422262 | 0.00746635  | protein_coding |
| ENSG00000142655 | PEX14    | -1.123171726 | 0.007991111 | protein_coding |
| ENSG00000115657 | ABCB6    | -1.123008486 | 0.041652925 | protein_coding |
| ENSG00000142534 | RPS11    | -1.122184457 | 0.006903326 | protein_coding |
| ENSG00000223865 | HLA-DPB1 | -1.122076945 | 0.040756224 | protein_coding |
| ENSG00000148362 | PAXX     | -1.121868817 | 0.007338622 | protein_coding |
| ENSG00000125821 | DTD1     | -1.121778255 | 0.008474586 | protein_coding |
| ENSG00000277791 | PSMB3    | -1.121598646 | 0.00712256  | protein_coding |
| ENSG00000269335 | IKBKG    | -1.120890846 | 0.010358224 | protein_coding |

|                 |                    |              |             |                |
|-----------------|--------------------|--------------|-------------|----------------|
| ENSG00000183479 | TREX2              | -1.11992893  | 0.019410249 | protein_coding |
| ENSG00000114125 | RNF7               | -1.11986733  | 0.007926042 | protein_coding |
| ENSG00000274419 | TBC1D3D            | -1.119663278 | 0.038387234 | protein_coding |
| ENSG00000026036 | RTEL1-<br>TNFRSF6B | -1.118947388 | 0.019284915 | protein_coding |
| ENSG00000176473 | WDR25              | -1.117437298 | 0.013149533 | protein_coding |
| ENSG00000197696 | NMB                | -1.117242098 | 0.009126742 | protein_coding |
| ENSG00000168061 | SAC3D1             | -1.117154855 | 0.007825219 | protein_coding |
| ENSG00000129911 | KLF16              | -1.116821612 | 0.007619489 | protein_coding |
| ENSG00000167705 | RILP               | -1.116666384 | 0.011280336 | protein_coding |
| ENSG00000285589 | AC010422.8         | -1.116577576 | 0.035267165 | protein_coding |
| ENSG00000185664 | PMEL               | -1.116577576 | 0.035267165 | protein_coding |
| ENSG00000104870 | FCGRT              | -1.115632351 | 0.010210284 | protein_coding |
| ENSG00000123576 | ESX1               | -1.115581027 | 0.034238954 | protein_coding |
| ENSG00000169738 | DCXR               | -1.1150221   | 0.007587052 | protein_coding |
| ENSG00000102265 | TIMP1              | -1.114376125 | 0.008178462 | protein_coding |
| ENSG00000204305 | AGER               | -1.113884347 | 0.02963984  | protein_coding |
| ENSG00000131469 | RPL27              | -1.112452313 | 0.007399045 | protein_coding |
| ENSG00000167645 | YIF1B              | -1.111905966 | 0.007850191 | protein_coding |
| ENSG00000090932 | DLL3               | -1.111888724 | 0.011639595 | protein_coding |
| ENSG00000126756 | UXT                | -1.111628126 | 0.00849128  | protein_coding |
| ENSG00000164978 | NUDT2              | -1.110900597 | 0.010163482 | protein_coding |
| ENSG00000094631 | HDAC6              | -1.110814133 | 0.008338089 | protein_coding |
| ENSG00000163794 | UCN                | -1.110127449 | 0.021362683 | protein_coding |
| ENSG00000170965 | PLAC1              | -1.110089126 | 0.013298416 | protein_coding |
| ENSG00000159713 | TPPP3              | -1.109912907 | 0.021281883 | protein_coding |
| ENSG00000284976 | BX255925.3         | -1.109854522 | 0.00862165  | protein_coding |
| ENSG00000100445 | SDR39U1            | -1.109215708 | 0.009366129 | protein_coding |
| ENSG00000166295 | ANAPC16            | -1.108936033 | 0.008049079 | protein_coding |
| ENSG00000105376 | ICAM5              | -1.108920019 | 0.008973516 | protein_coding |
| ENSG00000104957 | CCDC130            | -1.108595084 | 0.009254004 | protein_coding |
| ENSG00000128309 | MPST               | -1.108030588 | 0.007896497 | protein_coding |
| ENSG00000168273 | SMIM4              | -1.10756992  | 0.010222191 | protein_coding |
| ENSG00000125520 | SLC2A4RG           | -1.106981457 | 0.008122335 | protein_coding |
| ENSG00000100983 | GSS                | -1.106630472 | 0.008358631 | protein_coding |
| ENSG00000164162 | ANAPC10            | -1.105842238 | 0.016068231 | protein_coding |
| ENSG00000166311 | SMPD1              | -1.105588968 | 0.01607251  | protein_coding |
| ENSG00000162244 | RPL29              | -1.105135088 | 0.007769151 | protein_coding |
| ENSG00000006757 | PNPLA4             | -1.105098791 | 0.010903269 | protein_coding |
| ENSG00000104936 | DMPK               | -1.104452921 | 0.008618915 | protein_coding |
| ENSG00000143198 | MGST3              | -1.104433333 | 0.008485057 | protein_coding |
| ENSG00000141994 | DUS3L              | -1.104184561 | 0.008305781 | protein_coding |
| ENSG00000123144 | TRIR               | -1.104179135 | 0.00798282  | protein_coding |



|                 |         |              |             |                |
|-----------------|---------|--------------|-------------|----------------|
| ENSG00000137038 | DMAC1   | -1.103899497 | 0.008618592 | protein_coding |
| ENSG00000144589 | STK11IP | -1.103316668 | 0.009446968 | protein_coding |
| ENSG00000165502 | RPL36AL | -1.103053532 | 0.00819123  | protein_coding |
| ENSG00000213366 | GSTM2   | -1.101805948 | 0.01167373  | protein_coding |
| ENSG00000187244 | BCAM    | -1.101716173 | 0.009413643 | protein_coding |
| ENSG00000163481 | RNF25   | -1.101384755 | 0.009217019 | protein_coding |
| ENSG00000065518 | NDUFB4  | -1.099501144 | 0.008503691 | protein_coding |
| ENSG00000083845 | RPS5    | -1.099189057 | 0.008120481 | protein_coding |
| ENSG00000130770 | ATP5IF1 | -1.099040756 | 0.00832818  | protein_coding |
| ENSG00000102030 | NAA10   | -1.098376709 | 0.008661291 | protein_coding |
| ENSG00000141741 | MIEN1   | -1.098221727 | 0.009624968 | protein_coding |
| ENSG00000104976 | SNAPC2  | -1.097969069 | 0.011352458 | protein_coding |
| ENSG00000133247 | KMT5C   | -1.097349894 | 0.008996676 | protein_coding |
| ENSG00000167930 | FAM234A | -1.096832856 | 0.009453588 | protein_coding |
| ENSG00000266472 | MRPS21  | -1.096797067 | 0.00864517  | protein_coding |
| ENSG00000104960 | PTOV1   | -1.096338274 | 0.008518131 | protein_coding |
| ENSG00000163462 | TRIM46  | -1.096214161 | 0.02638362  | protein_coding |
| ENSG00000132017 | DCAF15  | -1.095815878 | 0.008988734 | protein_coding |
| ENSG00000157326 | DHRS4   | -1.095665651 | 0.010558285 | protein_coding |
| ENSG00000204852 | TCTN1   | -1.095607027 | 0.010470579 | protein_coding |
| ENSG00000145777 | TSLP    | -1.095553019 | 0.039100151 | protein_coding |
| ENSG00000122481 | RWDD3   | -1.095271755 | 0.041363994 | protein_coding |
| ENSG00000170043 | TRAPPC1 | -1.094776369 | 0.008923787 | protein_coding |
| ENSG00000165655 | ZNF503  | -1.094686404 | 0.008549538 | protein_coding |
| ENSG00000161920 | MED11   | -1.094298811 | 0.011851392 | protein_coding |
| ENSG00000101608 | MYL12A  | -1.093693372 | 0.009458242 | protein_coding |
| ENSG00000177700 | POLR2L  | -1.093015557 | 0.008927547 | protein_coding |
| ENSG00000184209 | SNRNP35 | -1.092240014 | 0.011436999 | protein_coding |
| ENSG00000140365 | COMMD4  | -1.091848607 | 0.008889148 | protein_coding |
| ENSG00000164087 | POC1A   | -1.091241676 | 0.009926959 | protein_coding |
| ENSG00000143774 | GUK1    | -1.091225898 | 0.008726643 | protein_coding |
| ENSG00000100949 | RABGGTA | -1.091008954 | 0.009872746 | protein_coding |
| ENSG00000214253 | FIS1    | -1.090748477 | 0.009307678 | protein_coding |
| ENSG00000139180 | NDUFA9  | -1.089672928 | 0.011157658 | protein_coding |
| ENSG00000143320 | CRABP2  | -1.089433492 | 0.009278392 | protein_coding |
| ENSG00000178821 | TMEM52  | -1.089333153 | 0.017663488 | protein_coding |
| ENSG00000168393 | DTYMK   | -1.088840219 | 0.009045689 | protein_coding |
| ENSG00000133874 | RNF122  | -1.088744807 | 0.01355047  | protein_coding |
| ENSG00000117305 | HMGCL   | -1.088641965 | 0.0116265   | protein_coding |
| ENSG00000102878 | HSF4    | -1.087924931 | 0.018855048 | protein_coding |
| ENSG00000102032 | RENBP   | -1.087787726 | 0.018887039 | protein_coding |
| ENSG00000220205 | VAMP2   | -1.087711367 | 0.010430575 | protein_coding |
| ENSG00000185340 | GAS2L1  | -1.087551955 | 0.012296922 | protein_coding |

|                 |         |              |             |                |
|-----------------|---------|--------------|-------------|----------------|
| ENSG00000175334 | BANF1   | -1.08750544  | 0.008982535 | protein_coding |
| ENSG00000140990 | NDUFB10 | -1.086711387 | 0.009031601 | protein_coding |
| ENSG00000103024 | NME3    | -1.086665206 | 0.009290175 | protein_coding |
| ENSG00000166173 | LARP6   | -1.085639285 | 0.0104451   | protein_coding |
| ENSG00000143554 | SLC27A3 | -1.08535462  | 0.015490837 | protein_coding |
| ENSG00000107902 | LHPP    | -1.08533502  | 0.013009806 | protein_coding |
| ENSG00000128524 | ATP6V1F | -1.08505298  | 0.009256894 | protein_coding |
| ENSG00000169976 | SF3B5   | -1.084271185 | 0.00930586  | protein_coding |
| ENSG00000174080 | CTSF    | -1.08421912  | 0.010950486 | protein_coding |
| ENSG00000166228 | PCBD1   | -1.084196803 | 0.009952824 | protein_coding |
| ENSG00000169750 | RAC3    | -1.08410829  | 0.00921217  | protein_coding |
| ENSG00000130005 | GAMT    | -1.083237672 | 0.010001925 | protein_coding |
| ENSG00000160446 | ZDHHC12 | -1.082301079 | 0.011114081 | protein_coding |
| ENSG00000064961 | HMG20B  | -1.082243838 | 0.009352735 | protein_coding |
| ENSG00000162591 | MEGF6   | -1.082107284 | 0.014591355 | protein_coding |
| ENSG00000125826 | RBCK1   | -1.082006694 | 0.010031932 | protein_coding |
| ENSG00000167676 | PLIN4   | -1.08200215  | 0.027282044 | protein_coding |
| ENSG00000132522 | GPS2    | -1.081744624 | 0.01456437  | protein_coding |
| ENSG00000005075 | POLR2J  | -1.081601129 | 0.010358903 | protein_coding |
| ENSG00000137288 | UQCC2   | -1.081199084 | 0.010178092 | protein_coding |
| ENSG00000196517 | SLC6A9  | -1.08097749  | 0.01055273  | protein_coding |
| ENSG00000105701 | FKBP8   | -1.079349433 | 0.009421392 | protein_coding |
| ENSG00000118292 | C1orf54 | -1.078373788 | 0.0350671   | protein_coding |
| ENSG00000007516 | BAIAP3  | -1.07833488  | 0.019938131 | protein_coding |
| ENSG00000243477 | NAA80   | -1.07802666  | 0.012969495 | protein_coding |
| ENSG00000124172 | ATP5F1E | -1.077955703 | 0.009713283 | protein_coding |
| ENSG00000168477 | TNXB    | -1.077869452 | 0.035558915 | protein_coding |
| ENSG00000170604 | IRF2BP1 | -1.077607426 | 0.009792541 | protein_coding |
| ENSG00000237441 | RGL2    | -1.075726277 | 0.011976281 | protein_coding |
| ENSG00000099800 | TIMM13  | -1.075293882 | 0.009820929 | protein_coding |
| ENSG00000158109 | TPRG1L  | -1.074320064 | 0.012752296 | protein_coding |
| ENSG00000177239 | MAN1B1  | -1.074110427 | 0.010210942 | protein_coding |
| ENSG00000196155 | PLEKHG4 | -1.07400321  | 0.011244704 | protein_coding |
| ENSG00000183978 | COA3    | -1.073554297 | 0.010584869 | protein_coding |
| ENSG00000176209 | SMIM19  | -1.07351514  | 0.013425731 | protein_coding |
| ENSG00000140988 | RPS2    | -1.073303889 | 0.009663325 | protein_coding |
| ENSG00000095066 | HOOK2   | -1.073117797 | 0.011511598 | protein_coding |
| ENSG00000109736 | MFSD10  | -1.073008891 | 0.010298409 | protein_coding |
| ENSG00000100151 | PICK1   | -1.072415411 | 0.010600033 | protein_coding |
| ENSG00000156411 | ATP5MPL | -1.071629131 | 0.010197767 | protein_coding |
| ENSG00000119655 | NPC2    | -1.071228445 | 0.011303355 | protein_coding |
| ENSG00000067829 | IDH3G   | -1.071104848 | 0.010285007 | protein_coding |
| ENSG00000100908 | EMC9    | -1.071096573 | 0.011792891 | protein_coding |

|                 |           |              |             |                |
|-----------------|-----------|--------------|-------------|----------------|
| ENSG00000239789 | MRPS17    | -1.070725443 | 0.01434397  | protein_coding |
| ENSG00000172301 | COPRS     | -1.070673827 | 0.010760197 | protein_coding |
| ENSG00000163159 | VPS72     | -1.070601123 | 0.010381593 | protein_coding |
| ENSG00000147684 | NDUFB9    | -1.0705757   | 0.010226634 | protein_coding |
| ENSG00000142552 | RCN3      | -1.069147086 | 0.028700142 | protein_coding |
| ENSG00000076201 | PTPN23    | -1.069062894 | 0.010677387 | protein_coding |
| ENSG00000172336 | POP7      | -1.068940291 | 0.010299826 | protein_coding |
| ENSG00000140983 | RHOT2     | -1.068913927 | 0.010196624 | protein_coding |
| ENSG00000244165 | P2RY11    | -1.068302483 | 0.012985353 | protein_coding |
| ENSG00000085552 | IGSF9     | -1.067180269 | 0.021309186 | protein_coding |
| ENSG00000116691 | MIIP      | -1.066756934 | 0.01168199  | protein_coding |
| ENSG00000102890 | ELMO3     | -1.066733372 | 0.029757221 | protein_coding |
| ENSG00000147383 | NSDHL     | -1.066577147 | 0.010677309 | protein_coding |
| ENSG00000099282 | TSPAN15   | -1.066049814 | 0.012602534 | protein_coding |
| ENSG00000171530 | TBCA      | -1.065853071 | 0.010477521 | protein_coding |
| ENSG00000243927 | MRPS6     | -1.065203842 | 0.012529871 | protein_coding |
| ENSG00000151689 | INPP1     | -1.06507576  | 0.016064668 | protein_coding |
| ENSG00000159958 | TNFRSF13C | -1.064748503 | 0.014840566 | protein_coding |
| ENSG00000205572 | SERF1B    | -1.064585232 | 0.020389329 | protein_coding |
| ENSG00000146540 | C7orf50   | -1.06368193  | 0.01086731  | protein_coding |
| ENSG00000119013 | NDUFB3    | -1.063267315 | 0.011389978 | protein_coding |
| ENSG00000169857 | AVEN      | -1.062027109 | 0.015177624 | protein_coding |
| ENSG00000063241 | ISOC2     | -1.061228678 | 0.011131806 | protein_coding |
| ENSG00000133112 | TPT1      | -1.06030106  | 0.010644259 | protein_coding |
| ENSG00000177854 | TMEM187   | -1.058827856 | 0.016535348 | protein_coding |
| ENSG00000198840 | MT-ND3    | -1.058778024 | 0.01071665  | protein_coding |
| ENSG00000156587 | UBE2L6    | -1.058509838 | 0.039576581 | protein_coding |
| ENSG00000132793 | LPIN3     | -1.058074258 | 0.013942289 | protein_coding |
| ENSG00000143578 | CREB3L4   | -1.058067031 | 0.018807095 | protein_coding |
| ENSG00000168758 | SEMA4C    | -1.058014208 | 0.012011654 | protein_coding |
| ENSG00000184986 | TMEM121   | -1.057276194 | 0.013785389 | protein_coding |
| ENSG00000180879 | SSR4      | -1.056651186 | 0.011055751 | protein_coding |
| ENSG00000127445 | PIN1      | -1.056353668 | 0.011222214 | protein_coding |
| ENSG00000185000 | DGAT1     | -1.056290697 | 0.012158542 | protein_coding |
| ENSG00000142541 | RPL13A    | -1.056144244 | 0.010869269 | protein_coding |
| ENSG00000100075 | SLC25A1   | -1.055300815 | 0.011182119 | protein_coding |
| ENSG00000070540 | WIPI1     | -1.055141574 | 0.046016399 | protein_coding |
| ENSG00000156482 | RPL30     | -1.05510699  | 0.01105522  | protein_coding |
| ENSG00000153443 | UBALD1    | -1.053891202 | 0.01176088  | protein_coding |
| ENSG00000167543 | TP53I13   | -1.053835169 | 0.012372492 | protein_coding |
| ENSG00000180096 | 1-Sep     | -1.053505944 | 0.031516168 | protein_coding |
| ENSG00000239672 | NME1      | -1.052661813 | 0.011718273 | protein_coding |
| ENSG00000262814 | MRPL12    | -1.052659287 | 0.012394482 | protein_coding |

|                 |          |              |             |                |
|-----------------|----------|--------------|-------------|----------------|
| ENSG00000160957 | RECQL4   | -1.052618187 | 0.011475462 | protein_coding |
| ENSG00000182362 | YBEY     | -1.052200474 | 0.015315515 | protein_coding |
| ENSG00000204237 | OXLD1    | -1.051800875 | 0.012711441 | protein_coding |
| ENSG00000115685 | PPP1R7   | -1.05108065  | 0.012137911 | protein_coding |
| ENSG00000169189 | NSMCE1   | -1.050851198 | 0.013424827 | protein_coding |
| ENSG00000142546 | NOSIP    | -1.049284195 | 0.012088209 | protein_coding |
| ENSG00000100387 | RBX1     | -1.04843142  | 0.01196522  | protein_coding |
| ENSG00000242802 | AP5Z1    | -1.048315863 | 0.01293722  | protein_coding |
| ENSG00000104881 | PPP1R13L | -1.048012406 | 0.015639156 | protein_coding |
| ENSG00000160813 | PPP1R35  | -1.047863299 | 0.014186512 | protein_coding |
| ENSG00000197106 | SLC6A17  | -1.047585924 | 0.023760611 | protein_coding |
| ENSG00000037042 | TUBG2    | -1.047178636 | 0.017604501 | protein_coding |
| ENSG00000140025 | EFCAB11  | -1.047151541 | 0.019875295 | protein_coding |
| ENSG00000137312 | FLOT1    | -1.045242122 | 0.012218368 | protein_coding |
| ENSG00000103249 | CLCN7    | -1.045039589 | 0.012349942 | protein_coding |
| ENSG00000143258 | USP21    | -1.044990622 | 0.012766812 | protein_coding |
| ENSG00000101940 | WDR13    | -1.044916643 | 0.012522225 | protein_coding |
| ENSG00000077312 | SNRPA    | -1.044776835 | 0.012109456 | protein_coding |
| ENSG00000204348 | DXO      | -1.044722249 | 0.013294431 | protein_coding |
| ENSG00000178980 | SELENOW  | -1.044292361 | 0.013493988 | protein_coding |
| ENSG00000100348 | TXN2     | -1.044234166 | 0.012245448 | protein_coding |
| ENSG00000104522 | TSTA3    | -1.043323761 | 0.012922748 | protein_coding |
| ENSG00000170421 | KRT8     | -1.04331889  | 0.014740123 | protein_coding |
| ENSG00000061656 | SPAG4    | -1.043284644 | 0.030316257 | protein_coding |
| ENSG00000161904 | LEMD2    | -1.042890857 | 0.012840203 | protein_coding |
| ENSG00000114391 | RPL24    | -1.042842465 | 0.011924617 | protein_coding |
| ENSG00000179943 | FIZ1     | -1.041369409 | 0.014982094 | protein_coding |
| ENSG00000167925 | GHDC     | -1.041098576 | 0.013734915 | protein_coding |
| ENSG00000106330 | MOSPD3   | -1.041093234 | 0.016394291 | protein_coding |
| ENSG00000170892 | TSEN34   | -1.040367924 | 0.012765565 | protein_coding |
| ENSG00000213983 | APIG2    | -1.040171884 | 0.014457863 | protein_coding |
| ENSG00000171148 | TADA3    | -1.04005121  | 0.012914392 | protein_coding |
| ENSG00000206503 | HLA-A    | -1.038970592 | 0.013220877 | protein_coding |
| ENSG00000186577 | SMIM29   | -1.03880907  | 0.020540817 | protein_coding |
| ENSG00000114767 | RRP9     | -1.038482361 | 0.013049901 | protein_coding |
| ENSG00000131067 | GGT7     | -1.03842314  | 0.013288363 | protein_coding |
| ENSG00000143224 | PPOX     | -1.037956898 | 0.016279163 | protein_coding |
| ENSG00000182208 | MOB2     | -1.036406304 | 0.014399097 | protein_coding |
| ENSG00000170577 | SIX2     | -1.035509069 | 0.013519306 | protein_coding |
| ENSG00000214078 | CPNE1    | -1.035480766 | 0.01316086  | protein_coding |
| ENSG00000132702 | HAPLN2   | -1.035079879 | 0.035255976 | protein_coding |
| ENSG00000170122 | FOXD4    | -1.034840021 | 0.028479922 | protein_coding |
| ENSG00000107223 | EDF1     | -1.034366174 | 0.012902808 | protein_coding |

|                 |          |              |             |                |
|-----------------|----------|--------------|-------------|----------------|
| ENSG00000162496 | DHRS3    | -1.033845091 | 0.021183107 | protein_coding |
| ENSG00000106628 | POLD2    | -1.033842723 | 0.012945535 | protein_coding |
| ENSG00000067221 | STOML1   | -1.032573954 | 0.01925397  | protein_coding |
| ENSG00000187634 | SAMD11   | -1.032340365 | 0.013387146 | protein_coding |
| ENSG00000198680 | TUSC1    | -1.03205496  | 0.014026727 | protein_coding |
| ENSG00000130731 | METTL26  | -1.031452633 | 0.013568034 | protein_coding |
| ENSG00000088543 | C3orf18  | -1.03108894  | 0.02362233  | protein_coding |
| ENSG00000152475 | ZNF837   | -1.03108894  | 0.02362233  | protein_coding |
| ENSG00000071082 | RPL31    | -1.030662326 | 0.012936553 | protein_coding |
| ENSG00000126456 | IRF3     | -1.030373808 | 0.014077826 | protein_coding |
| ENSG00000172270 | BSG      | -1.029952504 | 0.012997336 | protein_coding |
| ENSG00000175600 | SUGCT    | -1.029682403 | 0.02484791  | protein_coding |
| ENSG00000103266 | STUB1    | -1.028347387 | 0.0135205   | protein_coding |
| ENSG00000108826 | MRPL27   | -1.028340749 | 0.014285054 | protein_coding |
| ENSG00000149557 | FEZ1     | -1.028254143 | 0.026421638 | protein_coding |
| ENSG00000109475 | RPL34    | -1.027900391 | 0.013228864 | protein_coding |
| ENSG00000185043 | CIB1     | -1.02703344  | 0.014223223 | protein_coding |
| ENSG00000105559 | PLEKHA4  | -1.02694883  | 0.026504484 | protein_coding |
| ENSG00000172500 | FIBP     | -1.026458854 | 0.014311745 | protein_coding |
| ENSG00000106367 | AP1S1    | -1.026084098 | 0.014062385 | protein_coding |
| ENSG00000136280 | CCM2     | -1.025898452 | 0.016129217 | protein_coding |
| ENSG00000158747 | NBL1     | -1.025762516 | 0.016375215 | protein_coding |
| ENSG00000164896 | FASTK    | -1.025433118 | 0.013778877 | protein_coding |
| ENSG00000171960 | PPIH     | -1.024712551 | 0.015191472 | protein_coding |
| ENSG00000149925 | ALDOA    | -1.024342789 | 0.02032646  | protein_coding |
| ENSG00000162384 | C1orf123 | -1.022631248 | 0.015195586 | protein_coding |
| ENSG00000064687 | ABCA7    | -1.022488924 | 0.01546097  | protein_coding |
| ENSG00000062282 | DGAT2    | -1.021564445 | 0.017907462 | protein_coding |
| ENSG00000112561 | TFEB     | -1.021142486 | 0.026066943 | protein_coding |
| ENSG00000187609 | EXD3     | -1.021110368 | 0.019437551 | protein_coding |
| ENSG00000214160 | ALG3     | -1.020946164 | 0.014919252 | protein_coding |
| ENSG00000196465 | MYL6B    | -1.020943617 | 0.014661989 | protein_coding |
| ENSG00000186501 | TMEM222  | -1.020720328 | 0.015473967 | protein_coding |
| ENSG00000215375 | MYL5     | -1.020358375 | 0.020930363 | protein_coding |
| ENSG00000250571 | GLI4     | -1.020292346 | 0.016664765 | protein_coding |
| ENSG00000149591 | TAGLN    | -1.018809693 | 0.034196404 | protein_coding |
| ENSG00000071889 | FAM3A    | -1.017714342 | 0.014802867 | protein_coding |
| ENSG00000166292 | TMEM100  | -1.017606298 | 0.038729376 | protein_coding |
| ENSG00000214279 | SCART1   | -1.017340096 | 0.023133282 | protein_coding |
| ENSG00000126461 | SCAF1    | -1.017117681 | 0.014481572 | protein_coding |
| ENSG00000143256 | PFDN2    | -1.016418065 | 0.014910745 | protein_coding |
| ENSG00000065268 | WDR18    | -1.016300257 | 0.014699953 | protein_coding |
| ENSG00000072506 | HSD17B10 | -1.016040337 | 0.014597843 | protein_coding |

|                 |          |              |             |                |
|-----------------|----------|--------------|-------------|----------------|
| ENSG00000147403 | RPL10    | -1.015935125 | 0.014223229 | protein_coding |
| ENSG00000180992 | MRPL14   | -1.014229398 | 0.015133343 | protein_coding |
| ENSG00000123975 | CKS2     | -1.01411795  | 0.01498988  | protein_coding |
| ENSG00000102309 | PIN4     | -1.013933492 | 0.015963674 | protein_coding |
| ENSG00000177943 | MAMDC4   | -1.013007413 | 0.027246764 | protein_coding |
| ENSG00000129235 | TXNDC17  | -1.013000346 | 0.01643557  | protein_coding |
| ENSG00000105135 | ILVBL    | -1.012758524 | 0.015292416 | protein_coding |
| ENSG00000247596 | TWF2     | -1.012393459 | 0.016103422 | protein_coding |
| ENSG00000172889 | EGFL7    | -1.011884652 | 0.016194018 | protein_coding |
| ENSG00000204227 | RING1    | -1.011273079 | 0.015829813 | protein_coding |
| ENSG00000104805 | NUCB1    | -1.009985318 | 0.015233636 | protein_coding |
| ENSG00000181404 | WASHC1   | -1.009919442 | 0.019861739 | protein_coding |
| ENSG00000167641 | PPP1R14A | -1.009454602 | 0.019433496 | protein_coding |
| ENSG00000184752 | NDUFA12  | -1.009301106 | 0.015991987 | protein_coding |
| ENSG00000158941 | CCAR2    | -1.008180124 | 0.015679182 | protein_coding |
| ENSG00000082014 | SMARCD3  | -1.00796609  | 0.015930608 | protein_coding |
| ENSG00000174177 | CTU2     | -1.007533476 | 0.016663152 | protein_coding |
| ENSG00000173660 | UQCRH    | -1.007300475 | 0.015261206 | protein_coding |
| ENSG00000090263 | MRPS33   | -1.006580057 | 0.016357682 | protein_coding |
| ENSG00000105997 | HOXA3    | -1.005370013 | 0.019854368 | protein_coding |
| ENSG00000112306 | RPS12    | -1.004947798 | 0.015350404 | protein_coding |
| ENSG00000166681 | BEX3     | -1.004491383 | 0.015518922 | protein_coding |
| ENSG00000125931 | CITED1   | -1.004018087 | 0.019083153 | protein_coding |
| ENSG00000167632 | TRAPPC9  | -1.003746525 | 0.020166624 | protein_coding |
| ENSG00000030582 | GRN      | -1.002138235 | 0.015956573 | protein_coding |
| ENSG00000032444 | PNPLA6   | -1.002009171 | 0.017095958 | protein_coding |
| ENSG00000174775 | HRAS     | -1.001613108 | 0.016517577 | protein_coding |
| ENSG00000189227 | C15orf61 | -1.001503179 | 0.020446683 | protein_coding |
| ENSG00000162385 | MAGOH    | -1.001437776 | 0.016679157 | protein_coding |
| ENSG00000136908 | DPM2     | -1.001397621 | 0.016549416 | protein_coding |
| ENSG00000174021 | GNG5     | -1.000720498 | 0.021307459 | protein_coding |
| ENSG00000076641 | PAG1     | 1.000009382  | 0.017656512 | protein_coding |
| ENSG00000019995 | ZRANB1   | 1.000065837  | 0.021158063 | protein_coding |
| ENSG00000180357 | ZNF609   | 1.000201325  | 0.017302611 | protein_coding |
| ENSG00000057704 | TMCC3    | 1.000238013  | 0.026514585 | protein_coding |
| ENSG00000170832 | USP32    | 1.000294312  | 0.017863895 | protein_coding |
| ENSG00000107105 | ELAVL2   | 1.001107802  | 0.020516696 | protein_coding |
| ENSG00000162769 | FLVCR1   | 1.002229515  | 0.017629413 | protein_coding |
| ENSG00000111912 | NCOA7    | 1.002418542  | 0.020583307 | protein_coding |
| ENSG00000120690 | ELF1     | 1.003107225  | 0.019115182 | protein_coding |
| ENSG00000121892 | PDS5A    | 1.003251622  | 0.016109874 | protein_coding |
| ENSG00000178694 | NSUN3    | 1.003370048  | 0.024321    | protein_coding |
| ENSG00000141425 | RPRD1A   | 1.003515119  | 0.015726872 | protein_coding |

|                 |           |             |             |                |
|-----------------|-----------|-------------|-------------|----------------|
| ENSG00000110422 | HIPK3     | 1.003772117 | 0.017970486 | protein_coding |
| ENSG00000065150 | IPO5      | 1.003946681 | 0.015519103 | protein_coding |
| ENSG00000146376 | ARHGAP18  | 1.004715583 | 0.02398421  | protein_coding |
| ENSG00000126016 | AMOT      | 1.005641374 | 0.015317789 | protein_coding |
| ENSG00000090060 | PAPOLA    | 1.006223149 | 0.015478516 | protein_coding |
| ENSG00000028203 | VEZT      | 1.006573313 | 0.016933104 | protein_coding |
| ENSG00000068650 | ATP11A    | 1.006737394 | 0.016828552 | protein_coding |
| ENSG00000059758 | CDK17     | 1.007782733 | 0.018545767 | protein_coding |
| ENSG00000152223 | EPG5      | 1.008181839 | 0.023142029 | protein_coding |
| ENSG00000005483 | KMT2E     | 1.00847907  | 0.017086501 | protein_coding |
| ENSG00000113569 | NUP155    | 1.008640888 | 0.015433038 | protein_coding |
| ENSG00000205269 | TMEM170B  | 1.008813578 | 0.017743419 | protein_coding |
| ENSG00000102230 | PCYT1B    | 1.008852095 | 0.046668662 | protein_coding |
| ENSG00000155158 | TTC39B    | 1.009475867 | 0.02376846  | protein_coding |
| ENSG00000151338 | MIPOL1    | 1.01016201  | 0.021426035 | protein_coding |
| ENSG00000144747 | TMF1      | 1.010206897 | 0.017400344 | protein_coding |
| ENSG00000150471 | ADGRL3    | 1.010235815 | 0.019212639 | protein_coding |
| ENSG00000183495 | EP400     | 1.010571042 | 0.015341925 | protein_coding |
| ENSG00000105887 | MTPN      | 1.011364335 | 0.014908158 | protein_coding |
| ENSG00000144791 | LIMD1     | 1.012004908 | 0.015943165 | protein_coding |
| ENSG00000152413 | HOMER1    | 1.012387339 | 0.016297217 | protein_coding |
| ENSG00000088854 | C20orf194 | 1.01326061  | 0.021520398 | protein_coding |
| ENSG00000162733 | DDR2      | 1.013416155 | 0.018824934 | protein_coding |
| ENSG00000254598 | CSNK2A3   | 1.01403971  | 0.030157284 | protein_coding |
| ENSG00000254004 | ZNF260    | 1.014116496 | 0.020150659 | protein_coding |
| ENSG00000250305 | TRMT9B    | 1.015379901 | 0.036217426 | protein_coding |
| ENSG00000093000 | NUP50     | 1.01576698  | 0.01473054  | protein_coding |
| ENSG00000107036 | RIC1      | 1.016217949 | 0.016626757 | protein_coding |
| ENSG00000198879 | SFMBT2    | 1.016428558 | 0.016963761 | protein_coding |
| ENSG00000211455 | STK38L    | 1.016549171 | 0.016213113 | protein_coding |
| ENSG00000138386 | NAB1      | 1.017070512 | 0.016675609 | protein_coding |
| ENSG00000118965 | WDR35     | 1.017475042 | 0.015731661 | protein_coding |
| ENSG00000196482 | ESRRG     | 1.017494032 | 0.039567381 | protein_coding |
| ENSG00000102781 | KATNAL1   | 1.017968198 | 0.017666696 | protein_coding |
| ENSG00000168116 | KIAA1586  | 1.018095987 | 0.018261392 | protein_coding |
| ENSG00000109572 | CLCN3     | 1.018317528 | 0.015024794 | protein_coding |
| ENSG00000007202 | KIAA0100  | 1.018453274 | 0.01444396  | protein_coding |
| ENSG00000134324 | LPIN1     | 1.01847084  | 0.016822049 | protein_coding |
| ENSG00000050405 | LIMA1     | 1.018908842 | 0.015314111 | protein_coding |
| ENSG00000180574 | EIF2S3B   | 1.019094708 | 0.030870438 | protein_coding |
| ENSG00000165671 | NSD1      | 1.019182659 | 0.014290304 | protein_coding |
| ENSG00000039068 | CDH1      | 1.019309861 | 0.032524508 | protein_coding |
| ENSG00000164327 | RICTOR    | 1.019474526 | 0.017837558 | protein_coding |

|                 |          |             |             |                |
|-----------------|----------|-------------|-------------|----------------|
| ENSG00000114346 | ECT2     | 1.019848643 | 0.014679238 | protein_coding |
| ENSG00000182150 | ERCC6L2  | 1.02001298  | 0.019104317 | protein_coding |
| ENSG00000100167 | 3-Sep    | 1.020925852 | 0.015463132 | protein_coding |
| ENSG00000162852 | CNST     | 1.021491582 | 0.018922978 | protein_coding |
| ENSG00000219481 | NBPF1    | 1.021698628 | 0.017154593 | protein_coding |
| ENSG00000147894 | C9orf72  | 1.022105075 | 0.018182159 | protein_coding |
| ENSG00000154124 | OTULIN   | 1.022320295 | 0.015578709 | protein_coding |
| ENSG00000214357 | NEURL1B  | 1.022342562 | 0.023408739 | protein_coding |
| ENSG00000108424 | KPNB1    | 1.022405229 | 0.013718863 | protein_coding |
| ENSG00000163513 | TGFBR2   | 1.022655323 | 0.023862253 | protein_coding |
| ENSG00000145990 | GFOD1    | 1.022664651 | 0.015904068 | protein_coding |
| ENSG00000101972 | STAG2    | 1.023045739 | 0.013801063 | protein_coding |
| ENSG00000182957 | SPATA13  | 1.023763255 | 0.02122763  | protein_coding |
| ENSG00000240694 | PNMA2    | 1.023995029 | 0.017578132 | protein_coding |
| ENSG00000150712 | MTMR12   | 1.024065585 | 0.015555999 | protein_coding |
| ENSG00000156535 | CD109    | 1.024133487 | 0.018992632 | protein_coding |
| ENSG00000160179 | ABCG1    | 1.024381671 | 0.046991593 | protein_coding |
| ENSG00000152061 | RABGAP1L | 1.024469797 | 0.016105017 | protein_coding |
| ENSG00000117461 | PIK3R3   | 1.025088586 | 0.015261292 | protein_coding |
| ENSG00000108175 | ZMIZ1    | 1.025117809 | 0.014530295 | protein_coding |
| ENSG00000178074 | C2orf69  | 1.025268215 | 0.016691227 | protein_coding |
| ENSG00000095203 | EPB41L4B | 1.025592586 | 0.017984942 | protein_coding |
| ENSG00000137822 | TUBGCP4  | 1.027377268 | 0.015024813 | protein_coding |
| ENSG00000172466 | ZNF24    | 1.027677312 | 0.013447718 | protein_coding |
| ENSG00000141027 | NCOR1    | 1.027789111 | 0.013767721 | protein_coding |
| ENSG00000177463 | NR2C2    | 1.02792596  | 0.014238728 | protein_coding |
| ENSG00000163638 | ADAMTS9  | 1.027950829 | 0.022871413 | protein_coding |
| ENSG00000137177 | KIF13A   | 1.028233491 | 0.015543268 | protein_coding |
| ENSG00000170871 | KIAA0232 | 1.029248438 | 0.01521127  | protein_coding |
| ENSG00000112319 | EYA4     | 1.029464987 | 0.014853251 | protein_coding |
| ENSG00000133056 | PIK3C2B  | 1.02951904  | 0.015333097 | protein_coding |
| ENSG00000125772 | GPCPD1   | 1.029870049 | 0.01692027  | protein_coding |
| ENSG00000123191 | ATP7B    | 1.029983929 | 0.014793903 | protein_coding |
| ENSG00000159256 | MORC3    | 1.030014129 | 0.017665352 | protein_coding |
| ENSG00000065526 | SPEN     | 1.030413017 | 0.013099777 | protein_coding |
| ENSG00000116747 | TROVE2   | 1.030460237 | 0.01406998  | protein_coding |
| ENSG00000170145 | SIK2     | 1.030734799 | 0.014391392 | protein_coding |
| ENSG00000012174 | MBTPS2   | 1.032238988 | 0.014438001 | protein_coding |
| ENSG00000173575 | CHD2     | 1.032457522 | 0.014064451 | protein_coding |
| ENSG00000111371 | SLC38A1  | 1.032489084 | 0.013025023 | protein_coding |
| ENSG00000224470 | ATXN1L   | 1.032497499 | 0.014025365 | protein_coding |
| ENSG00000127946 | HIP1     | 1.032843001 | 0.014269818 | protein_coding |
| ENSG00000082516 | GEMIN5   | 1.033267358 | 0.013549305 | protein_coding |



|                 |          |             |             |                |
|-----------------|----------|-------------|-------------|----------------|
| ENSG00000173064 | HECTD4   | 1.034399646 | 0.013579237 | protein_coding |
| ENSG00000157657 | ZNF618   | 1.034522443 | 0.013861378 | protein_coding |
| ENSG00000167981 | ZNF597   | 1.034714032 | 0.034958896 | protein_coding |
| ENSG00000123094 | RASSF8   | 1.034853831 | 0.015483637 | protein_coding |
| ENSG00000198887 | SMC5     | 1.035140517 | 0.013763348 | protein_coding |
| ENSG00000142556 | ZNF614   | 1.035397709 | 0.016675525 | protein_coding |
| ENSG00000125630 | POLR1B   | 1.035670084 | 0.013217909 | protein_coding |
| ENSG00000134294 | SLC38A2  | 1.035970791 | 0.01277468  | protein_coding |
| ENSG00000109586 | GALNT7   | 1.036639639 | 0.014804977 | protein_coding |
| ENSG00000183943 | PRKX     | 1.036724294 | 0.013998079 | protein_coding |
| ENSG00000082438 | COBLL1   | 1.037574904 | 0.017926768 | protein_coding |
| ENSG00000131370 | SH3BP5   | 1.037816885 | 0.016783658 | protein_coding |
| ENSG00000120256 | LRP11    | 1.03998087  | 0.038182333 | protein_coding |
| ENSG00000139970 | RTN1     | 1.040101689 | 0.038333506 | protein_coding |
| ENSG00000180884 | ZNF792   | 1.040101689 | 0.038333506 | protein_coding |
| ENSG00000179841 | AKAP5    | 1.040710827 | 0.021150635 | protein_coding |
| ENSG00000070367 | EXOC5    | 1.041399309 | 0.013024013 | protein_coding |
| ENSG00000196369 | SRGAP2B  | 1.042009454 | 0.021200137 | protein_coding |
| ENSG00000163535 | SGO2     | 1.042011817 | 0.014482625 | protein_coding |
| ENSG00000107863 | ARHGAP21 | 1.042084154 | 0.012897716 | protein_coding |
| ENSG00000137942 | FNBP1L   | 1.042382327 | 0.013708761 | protein_coding |
| ENSG00000167258 | CDK12    | 1.043108073 | 0.012381582 | protein_coding |
| ENSG00000068878 | PSME4    | 1.044293779 | 0.012412028 | protein_coding |
| ENSG00000104635 | SLC39A14 | 1.04480898  | 0.0121851   | protein_coding |
| ENSG00000040933 | INPP4A   | 1.044876625 | 0.012932479 | protein_coding |
| ENSG00000196586 | MYO6     | 1.047096632 | 0.012744742 | protein_coding |
| ENSG00000153956 | CACNA2D1 | 1.047146287 | 0.01445366  | protein_coding |
| ENSG00000139668 | WDFY2    | 1.048697305 | 0.016485881 | protein_coding |
| ENSG00000186951 | PPARA    | 1.048787415 | 0.014831719 | protein_coding |
| ENSG00000029725 | RABEP1   | 1.048880122 | 0.01201361  | protein_coding |
| ENSG00000154639 | CXADR    | 1.048985238 | 0.013556772 | protein_coding |
| ENSG00000139618 | BRCA2    | 1.049188689 | 0.013348187 | protein_coding |
| ENSG00000123600 | METTL8   | 1.049567733 | 0.013863345 | protein_coding |
| ENSG00000101695 | RNF125   | 1.050459495 | 0.013572857 | protein_coding |
| ENSG00000173281 | PPP1R3B  | 1.051190362 | 0.020463786 | protein_coding |
| ENSG00000198836 | OPA1     | 1.05131747  | 0.012193007 | protein_coding |
| ENSG00000078747 | ITCH     | 1.051380507 | 0.012329594 | protein_coding |
| ENSG00000015133 | CCDC88C  | 1.051523363 | 0.01375655  | protein_coding |
| ENSG00000125885 | MCM8     | 1.051741511 | 0.012097322 | protein_coding |
| ENSG00000131791 | PRKAB2   | 1.052172551 | 0.012666097 | protein_coding |
| ENSG00000083642 | PDS5B    | 1.0523078   | 0.01252313  | protein_coding |
| ENSG00000154309 | DISP1    | 1.052421629 | 0.022573217 | protein_coding |
| ENSG00000166147 | FBN1     | 1.052612395 | 0.015636978 | protein_coding |

|                 |          |             |             |                |
|-----------------|----------|-------------|-------------|----------------|
| ENSG00000181104 | F2R      | 1.053290222 | 0.013152333 | protein_coding |
| ENSG00000165732 | DDX21    | 1.053802642 | 0.011149429 | protein_coding |
| ENSG00000125676 | THOC2    | 1.054123814 | 0.011327741 | protein_coding |
| ENSG00000076356 | PLXNA2   | 1.054259037 | 0.015634731 | protein_coding |
| ENSG00000114062 | UBE3A    | 1.055478603 | 0.012162303 | protein_coding |
| ENSG00000062650 | WAPL     | 1.055954293 | 0.011554441 | protein_coding |
| ENSG00000101639 | CEP192   | 1.056605928 | 0.01358116  | protein_coding |
| ENSG00000134369 | NAV1     | 1.05686542  | 0.012339222 | protein_coding |
| ENSG00000167065 | DUSP18   | 1.057333905 | 0.030043599 | protein_coding |
| ENSG00000131263 | RLIM     | 1.058434199 | 0.011160968 | protein_coding |
| ENSG00000150938 | CRIM1    | 1.059446698 | 0.012506716 | protein_coding |
| ENSG00000138592 | USP8     | 1.059484638 | 0.012503211 | protein_coding |
| ENSG00000162702 | ZNF281   | 1.059624762 | 0.011790922 | protein_coding |
| ENSG00000147050 | KDM6A    | 1.0599423   | 0.011906489 | protein_coding |
| ENSG00000151151 | IPMK     | 1.060709418 | 0.014206664 | protein_coding |
| ENSG00000116106 | EPHA4    | 1.060988326 | 0.01294825  | protein_coding |
| ENSG00000162688 | AGL      | 1.061403133 | 0.011448473 | protein_coding |
| ENSG00000001629 | ANKIB1   | 1.061467302 | 0.012762665 | protein_coding |
| ENSG00000196268 | ZNF493   | 1.061745591 | 0.024992401 | protein_coding |
| ENSG00000139926 | FRMD6    | 1.061826128 | 0.012902258 | protein_coding |
| ENSG00000167191 | GPRC5B   | 1.062407187 | 0.013842964 | protein_coding |
| ENSG00000173218 | VANGL1   | 1.062521103 | 0.012031739 | protein_coding |
| ENSG00000100393 | EP300    | 1.063036933 | 0.010815328 | protein_coding |
| ENSG00000141429 | GALNT1   | 1.063092325 | 0.010802301 | protein_coding |
| ENSG00000225830 | ERCC6    | 1.064946261 | 0.015219495 | protein_coding |
| ENSG00000151320 | AKAP6    | 1.065325099 | 0.036686451 | protein_coding |
| ENSG00000185352 | HS6ST3   | 1.066325493 | 0.03089312  | protein_coding |
| ENSG00000048471 | SNX29    | 1.066407245 | 0.014208595 | protein_coding |
| ENSG00000154642 | C21orf91 | 1.066518952 | 0.013909178 | protein_coding |
| ENSG00000159579 | RSPRY1   | 1.06700502  | 0.012192885 | protein_coding |
| ENSG00000151233 | GXYLT1   | 1.067080068 | 0.011352074 | protein_coding |
| ENSG00000172071 | EIF2AK3  | 1.067337847 | 0.015578498 | protein_coding |
| ENSG00000086712 | TXLNG    | 1.06772276  | 0.01061385  | protein_coding |
| ENSG00000143190 | POU2F1   | 1.068159503 | 0.0113022   | protein_coding |
| ENSG00000196935 | SRGAP1   | 1.068752284 | 0.018303645 | protein_coding |
| ENSG00000092439 | TRPM7    | 1.069345334 | 0.011116046 | protein_coding |
| ENSG00000171943 | SRGAP2C  | 1.069456963 | 0.013265315 | protein_coding |
| ENSG00000140575 | IQGAP1   | 1.069747019 | 0.010267916 | protein_coding |
| ENSG00000159433 | STARD9   | 1.069995939 | 0.012463491 | protein_coding |
| ENSG00000138759 | FRAS1    | 1.071197379 | 0.011655897 | protein_coding |
| ENSG00000185532 | PRKG1    | 1.071952566 | 0.015119084 | protein_coding |
| ENSG00000205060 | SLC35B4  | 1.07226359  | 0.010231393 | protein_coding |
| ENSG00000196376 | SLC35F1  | 1.072803587 | 0.012158262 | protein_coding |

|                 |         |             |             |                |
|-----------------|---------|-------------|-------------|----------------|
| ENSG00000145087 | STXBP5L | 1.072920237 | 0.029208486 | protein_coding |
| ENSG00000132326 | PER2    | 1.073396602 | 0.016070052 | protein_coding |
| ENSG00000168743 | NPNT    | 1.073672108 | 0.039811039 | protein_coding |
| ENSG00000108061 | SHOC2   | 1.073710275 | 0.010871977 | protein_coding |
| ENSG00000082269 | FAM135A | 1.073767273 | 0.011996713 | protein_coding |
| ENSG00000168282 | MGAT2   | 1.073998569 | 0.048419861 | protein_coding |
| ENSG00000120063 | GNA13   | 1.074981015 | 0.010615099 | protein_coding |
| ENSG00000149289 | ZC3H12C | 1.075158127 | 0.017366448 | protein_coding |
| ENSG00000185722 | ANKFY1  | 1.075339957 | 0.010156588 | protein_coding |
| ENSG00000070882 | OSBPL3  | 1.075747154 | 0.011333251 | protein_coding |
| ENSG00000133026 | MYH10   | 1.075873697 | 0.009683531 | protein_coding |
| ENSG00000118985 | ELL2    | 1.075908087 | 0.011956481 | protein_coding |
| ENSG00000116678 | LEPR    | 1.076518543 | 0.011551466 | protein_coding |
| mk              | IGF2BP3 | 1.076596495 | 0.011227663 | protein_coding |
| ENSG00000184661 | CDCA2   | 1.077228158 | 0.011797658 | protein_coding |
| ENSG00000175216 | CKAP5   | 1.077293355 | 0.009607117 | protein_coding |
| ENSG00000182010 | RTKN2   | 1.077565548 | 0.01217923  | protein_coding |
| ENSG00000139517 | LNK2    | 1.077585734 | 0.012492165 | protein_coding |
| ENSG00000125285 | SOX21   | 1.077816875 | 0.0232316   | protein_coding |
| ENSG00000138182 | KIF20B  | 1.078109723 | 0.010677182 | protein_coding |
| ENSG00000173542 | MOB1B   | 1.078174407 | 0.011976281 | protein_coding |
| ENSG00000049246 | PER3    | 1.078261211 | 0.023682354 | protein_coding |
| ENSG00000006607 | FARP2   | 1.078269765 | 0.010146262 | protein_coding |
| ENSG00000100815 | TRIP11  | 1.07856508  | 0.011775411 | protein_coding |
| ENSG00000121743 | GJA3    | 1.078742611 | 0.01468817  | protein_coding |
| ENSG00000001167 | NFYA    | 1.079355352 | 0.010269611 | protein_coding |
| ENSG00000173821 | RNF213  | 1.079375531 | 0.010430504 | protein_coding |
| ENSG00000170385 | SLC30A1 | 1.079415059 | 0.011068486 | protein_coding |
| ENSG00000109805 | NCAPG   | 1.080651757 | 0.009862947 | protein_coding |
| ENSG00000170448 | NFXL1   | 1.081721117 | 0.011760997 | protein_coding |
| ENSG00000184368 | MAP7D2  | 1.08189269  | 0.01058941  | protein_coding |
| ENSG00000148158 | SNX30   | 1.082885646 | 0.010606117 | protein_coding |
| ENSG00000111670 | GNPTAB  | 1.083274281 | 0.010353301 | protein_coding |
| ENSG00000152457 | DCLRE1C | 1.083304491 | 0.016739349 | protein_coding |
| ENSG00000004700 | RECQL   | 1.083413431 | 0.011412025 | protein_coding |
| ENSG00000126777 | KTN1    | 1.083528906 | 0.009322522 | protein_coding |
| ENSG00000082258 | CCNT2   | 1.083746359 | 0.010298582 | protein_coding |
| ENSG00000046604 | DSG2    | 1.083845856 | 0.009221969 | protein_coding |
| ENSG00000157890 | MEGF11  | 1.083962307 | 0.014625505 | protein_coding |
| ENSG00000170802 | FOXN2   | 1.084013961 | 0.012596877 | protein_coding |
| ENSG00000082898 | XPO1    | 1.084015649 | 0.009127393 | protein_coding |
| ENSG00000101966 | XIAP    | 1.085351242 | 0.009693935 | protein_coding |
| ENSG00000121903 | ZSCAN20 | 1.085485427 | 0.019846827 | protein_coding |

|                 |          |             |             |                |
|-----------------|----------|-------------|-------------|----------------|
| ENSG00000197147 | LRRC8B   | 1.085575699 | 0.011800622 | protein_coding |
| ENSG00000174106 | LEMD3    | 1.086486369 | 0.010004243 | protein_coding |
| ENSG00000165392 | WRN      | 1.087163813 | 0.011410424 | protein_coding |
| ENSG00000129534 | MIS18BP1 | 1.087404645 | 0.010254609 | protein_coding |
| ENSG00000106789 | CORO2A   | 1.087755844 | 0.013844841 | protein_coding |
| ENSG00000101974 | ATP11C   | 1.088695522 | 0.009181906 | protein_coding |
| ENSG00000171467 | ZNF318   | 1.08869895  | 0.009617773 | protein_coding |
| ENSG00000172888 | ZNF621   | 1.08906903  | 0.009649859 | protein_coding |
| ENSG00000107186 | MPDZ     | 1.089107453 | 0.010204693 | protein_coding |
| ENSG00000110172 | CHORDC1  | 1.089454861 | 0.009232023 | protein_coding |
| ENSG00000134352 | IL6ST    | 1.089715448 | 0.009882086 | protein_coding |
| ENSG00000163110 | PDLIM5   | 1.090214155 | 0.009917943 | protein_coding |
| ENSG00000122482 | ZNF644   | 1.090544839 | 0.009394944 | protein_coding |
| ENSG00000161813 | LARP4    | 1.090727006 | 0.009151893 | protein_coding |
| ENSG00000089057 | SLC23A2  | 1.090895929 | 0.009445496 | protein_coding |
| ENSG00000081189 | MEF2C    | 1.090921327 | 0.01276696  | protein_coding |
| ENSG00000203727 | SAMD5    | 1.091602562 | 0.015474095 | protein_coding |
| ENSG00000175175 | PPM1E    | 1.092170826 | 0.011347225 | protein_coding |
| ENSG00000143469 | SYT14    | 1.092290462 | 0.026660679 | protein_coding |
| ENSG00000118482 | PHF3     | 1.092341971 | 0.009295413 | protein_coding |
| ENSG00000115159 | GPD2     | 1.093153501 | 0.009952303 | protein_coding |
| ENSG00000138767 | CNOT6L   | 1.093517551 | 0.010064972 | protein_coding |
| ENSG00000188559 | RALGAPA2 | 1.09468193  | 0.010037466 | protein_coding |
| ENSG00000175155 | YPEL2    | 1.095836641 | 0.014902143 | protein_coding |
| ENSG00000162636 | FAM102B  | 1.095956226 | 0.009925405 | protein_coding |
| ENSG00000140382 | HMG20A   | 1.096106615 | 0.009093066 | protein_coding |
| ENSG00000068615 | REEP1    | 1.096384826 | 0.012364955 | protein_coding |
| ENSG00000164048 | ZNF589   | 1.096785793 | 0.009138365 | protein_coding |
| ENSG00000156052 | GNAQ     | 1.096986706 | 0.00933819  | protein_coding |
| ENSG00000135074 | ADAM19   | 1.09714098  | 0.012146503 | protein_coding |
| ENSG00000178691 | SUZ12    | 1.097718562 | 0.008756457 | protein_coding |
| ENSG00000089177 | KIF16B   | 1.097864482 | 0.011237693 | protein_coding |
| ENSG00000138741 | TRPC3    | 1.098203468 | 0.027736032 | protein_coding |
| ENSG00000092847 | AGO1     | 1.098402729 | 0.00891084  | protein_coding |
| ENSG00000163689 | C3orf67  | 1.098556148 | 0.020520452 | protein_coding |
| ENSG00000152409 | JMY      | 1.098671428 | 0.009428196 | protein_coding |
| ENSG00000143674 | MAP3K21  | 1.099216465 | 0.008662727 | protein_coding |
| ENSG00000184226 | PCDH9    | 1.099446448 | 0.008854737 | protein_coding |
| ENSG00000113163 | COL4A3BP | 1.099729569 | 0.009851842 | protein_coding |
| ENSG00000198901 | PRC1     | 1.099854744 | 0.027067397 | protein_coding |
| ENSG00000163661 | PTX3     | 1.100071244 | 0.036410837 | protein_coding |
| ENSG00000107957 | SH3PXD2A | 1.100317421 | 0.008470301 | protein_coding |
| ENSG00000175305 | CCNE2    | 1.101560173 | 0.014191029 | protein_coding |

|                 |            |             |             |                |
|-----------------|------------|-------------|-------------|----------------|
| ENSG00000130856 | ZNF236     | 1.101909814 | 0.011392861 | protein_coding |
| ENSG00000213047 | DENND1B    | 1.102105972 | 0.012067315 | protein_coding |
| ENSG00000135842 | FAM129A    | 1.102319841 | 0.013861412 | protein_coding |
| ENSG00000163781 | TOPBP1     | 1.102885416 | 0.008310982 | protein_coding |
| ENSG00000171634 | BPTF       | 1.103972899 | 0.008367226 | protein_coding |
| ENSG00000054267 | ARID4B     | 1.104591709 | 0.008637058 | protein_coding |
| ENSG00000068305 | MEF2A      | 1.104640138 | 0.008932358 | protein_coding |
| ENSG00000169641 | LUZP1      | 1.104992286 | 0.008825416 | protein_coding |
| ENSG00000068366 | ACSL4      | 1.105283871 | 0.008297571 | protein_coding |
| ENSG00000078674 | PCM1       | 1.105950611 | 0.008554698 | protein_coding |
| ENSG00000174010 | KLHL15     | 1.107254648 | 0.008401053 | protein_coding |
| ENSG00000079308 | TNS1       | 1.107317663 | 0.016977762 | protein_coding |
| ENSG00000102053 | ZC3H12B    | 1.107317663 | 0.016977762 | protein_coding |
| ENSG00000198677 | TTC37      | 1.108614874 | 0.007940994 | protein_coding |
| ENSG00000112739 | PRPF4B     | 1.10925909  | 0.007889241 | protein_coding |
| ENSG00000173905 | GOLIM4     | 1.109413156 | 0.008003863 | protein_coding |
| ENSG00000108924 | HLF        | 1.109525488 | 0.018055853 | protein_coding |
| ENSG00000196967 | ZNF585A    | 1.110576882 | 0.02705543  | protein_coding |
| ENSG00000197782 | ZNF780A    | 1.110804395 | 0.015351668 | protein_coding |
| ENSG00000196535 | MYO18A     | 1.111042334 | 0.008790301 | protein_coding |
| ENSG00000158417 | EIF5B      | 1.111356736 | 0.007677781 | protein_coding |
| ENSG00000156140 | ADAMTS3    | 1.111430501 | 0.011920075 | protein_coding |
| ENSG00000165868 | HSPA12A    | 1.111487322 | 0.009164374 | protein_coding |
| ENSG00000184867 | ARMCX2     | 1.111917612 | 0.045117399 | protein_coding |
| ENSG00000285053 | TBCE       | 1.113580042 | 0.012434369 | protein_coding |
| ENSG00000152217 | SETBP1     | 1.113783761 | 0.022887841 | protein_coding |
| ENSG00000134313 | KIDINS220  | 1.114194436 | 0.007984826 | protein_coding |
| ENSG00000285976 | AL135905.2 | 1.114358342 | 0.0210522   | protein_coding |
| ENSG00000137142 | IGFBPL1    | 1.114358342 | 0.0210522   | protein_coding |
| ENSG00000106392 | C1GALT1    | 1.114876979 | 0.010133152 | protein_coding |
| ENSG00000154310 | TNIK       | 1.114969216 | 0.008543037 | protein_coding |
| ENSG00000147133 | TAF1       | 1.115155002 | 0.008471868 | protein_coding |
| ENSG00000163393 | SLC22A15   | 1.115332042 | 0.018169896 | protein_coding |
| ENSG00000184445 | KNTC1      | 1.115938442 | 0.007794543 | protein_coding |
| ENSG00000095015 | MAP3K1     | 1.116125775 | 0.01052267  | protein_coding |
| ENSG00000130396 | AFDN       | 1.116834432 | 0.007407588 | protein_coding |
| ENSG00000090905 | TNRC6A     | 1.117185543 | 0.007858139 | protein_coding |
| ENSG00000130508 | PXDN       | 1.117368689 | 0.007955596 | protein_coding |
| ENSG00000114331 | ACAP2      | 1.11880525  | 0.008598588 | protein_coding |
| ENSG00000178295 | GEN1       | 1.119357825 | 0.008652584 | protein_coding |
| ENSG00000165895 | ARHGAP42   | 1.119810518 | 0.016931851 | protein_coding |
| ENSG00000100027 | YPEL1      | 1.120010916 | 0.046223025 | protein_coding |
| ENSG00000138411 | HECW2      | 1.120261919 | 0.01459975  | protein_coding |

|                 |         |             |             |                |
|-----------------|---------|-------------|-------------|----------------|
| ENSG00000152127 | MGAT5   | 1.120763121 | 0.007535584 | protein_coding |
| ENSG00000062370 | ZNF112  | 1.121075312 | 0.028375462 | protein_coding |
| ENSG00000205213 | LGR4    | 1.12108462  | 0.007712337 | protein_coding |
| ENSG00000177565 | TBL1XR1 | 1.121114377 | 0.008118432 | protein_coding |
| ENSG00000177707 | NECTIN3 | 1.121178997 | 0.008164468 | protein_coding |
| ENSG00000120756 | PLS1    | 1.121571451 | 0.00884327  | protein_coding |
| ENSG00000152332 | UHMK1   | 1.12187664  | 0.007306434 | protein_coding |
| ENSG00000110321 | EIF4G2  | 1.121965092 | 0.006933677 | protein_coding |
| ENSG00000075420 | FNDC3B  | 1.122264813 | 0.009777446 | protein_coding |
| ENSG00000118263 | KLF7    | 1.122497814 | 0.016030979 | protein_coding |
| ENSG00000171617 | ENC1    | 1.122877788 | 0.01346087  | protein_coding |
| ENSG00000146263 | MMS22L  | 1.122904965 | 0.007851866 | protein_coding |
| ENSG00000102531 | FNDC3A  | 1.12301963  | 0.007839222 | protein_coding |
| ENSG00000108256 | NUFIP2  | 1.124610481 | 0.006994181 | protein_coding |
| ENSG00000213020 | ZNF611  | 1.12556494  | 0.015152451 | protein_coding |
| ENSG00000139971 | ARMH4   | 1.125814561 | 0.018169896 | protein_coding |
| ENSG00000147234 | FRMPD3  | 1.125814561 | 0.018169896 | protein_coding |
| ENSG00000101109 | STK4    | 1.125828052 | 0.00721163  | protein_coding |
| ENSG00000166450 | PRTG    | 1.126113297 | 0.010410923 | protein_coding |
| ENSG00000071073 | MGAT4A  | 1.126257924 | 0.011129538 | protein_coding |
| ENSG00000186448 | ZNF197  | 1.126607319 | 0.009471113 | protein_coding |
| ENSG00000128872 | TMOD2   | 1.126863778 | 0.00883645  | protein_coding |
| ENSG00000151690 | MFSD6   | 1.127401719 | 0.028675344 | protein_coding |
| ENSG00000053747 | LAMA3   | 1.127444224 | 0.00811088  | protein_coding |
| ENSG00000170264 | FAM161A | 1.127800109 | 0.009738555 | protein_coding |
| ENSG00000133059 | DSTYK   | 1.128108814 | 0.007874025 | protein_coding |
| ENSG00000048028 | USP28   | 1.128526015 | 0.007520203 | protein_coding |
| ENSG00000145833 | DDX46   | 1.128544631 | 0.006805721 | protein_coding |
| ENSG00000180488 | MIGA1   | 1.128724999 | 0.008037186 | protein_coding |
| ENSG00000185219 | ZNF445  | 1.12912046  | 0.007278296 | protein_coding |
| ENSG00000181544 | FANCB   | 1.129239076 | 0.010821947 | protein_coding |
| ENSG00000176595 | KBTBD11 | 1.130359206 | 0.009451912 | protein_coding |
| ENSG00000196705 | ZNF431  | 1.130605704 | 0.008656678 | protein_coding |
| ENSG00000173376 | NDNF    | 1.132093598 | 0.012847833 | protein_coding |
| ENSG00000177119 | ANO6    | 1.132501783 | 0.00739013  | protein_coding |
| ENSG00000197442 | MAP3K5  | 1.133376423 | 0.008594256 | protein_coding |
| ENSG00000109618 | SEPSECS | 1.134162364 | 0.012346948 | protein_coding |
| ENSG00000158201 | ABHD3   | 1.134180586 | 0.008476529 | protein_coding |
| ENSG00000128731 | HERC2   | 1.135373117 | 0.006631012 | protein_coding |
| ENSG00000133985 | TTC9    | 1.13549171  | 0.021709332 | protein_coding |
| ENSG00000196876 | SCN8A   | 1.13562999  | 0.016010439 | protein_coding |
| ENSG00000148053 | NTRK2   | 1.136525289 | 0.03991628  | protein_coding |
| ENSG00000151718 | WWC2    | 1.136549823 | 0.007507958 | protein_coding |

|                 |            |             |             |                |
|-----------------|------------|-------------|-------------|----------------|
| ENSG00000173706 | HEG1       | 1.136727036 | 0.008024057 | protein_coding |
| ENSG00000241343 | RPL36A     | 1.136886767 | 0.007394402 | protein_coding |
| ENSG00000015568 | RGPD5      | 1.138225808 | 0.048686192 | protein_coding |
| ENSG00000109654 | TRIM2      | 1.138394487 | 0.007775591 | protein_coding |
| ENSG00000095637 | SORBS1     | 1.139676991 | 0.015217445 | protein_coding |
| ENSG00000085719 | CPNE3      | 1.140009692 | 0.006421113 | protein_coding |
| ENSG00000184898 | RBM43      | 1.140378509 | 0.02180232  | protein_coding |
| ENSG00000130684 | ZNF337     | 1.140378509 | 0.02180232  | protein_coding |
| ENSG00000125257 | ABCC4      | 1.141692603 | 0.00679721  | protein_coding |
| ENSG00000146648 | EGFR       | 1.141746527 | 0.008748302 | protein_coding |
| ENSG00000185920 | PTCH1      | 1.141791994 | 0.007322396 | protein_coding |
| ENSG00000177853 | ZNF518A    | 1.142443916 | 0.007177843 | protein_coding |
| ENSG00000198399 | ITSN2      | 1.142937908 | 0.007383045 | protein_coding |
| ENSG00000118946 | PCDH17     | 1.144565059 | 0.025239518 | protein_coding |
| ENSG00000138685 | FGF2       | 1.144899399 | 0.008633404 | protein_coding |
| ENSG00000184110 | EIF3C      | 1.145063571 | 0.006503007 | protein_coding |
| ENSG00000124406 | ATP8A1     | 1.14576443  | 0.008008687 | protein_coding |
| ENSG00000112276 | BVES       | 1.145794803 | 0.008416128 | protein_coding |
| ENSG00000164663 | USP49      | 1.145834144 | 0.007609191 | protein_coding |
| ENSG00000069702 | TGFBR3     | 1.14628283  | 0.00705522  | protein_coding |
| ENSG00000117069 | ST6GALNAC5 | 1.14647788  | 0.025850844 | protein_coding |
| ENSG00000164741 | DLC1       | 1.146848516 | 0.006953409 | protein_coding |
| ENSG00000204262 | COL5A2     | 1.147469845 | 0.019893    | protein_coding |
| ENSG00000198265 | HELZ       | 1.149658445 | 0.006314503 | protein_coding |
| ENSG00000135541 | AHI1       | 1.150030785 | 0.007579927 | protein_coding |
| ENSG00000023287 | RB1CC1     | 1.150196317 | 0.006177487 | protein_coding |
| ENSG00000122591 | FAM126A    | 1.150337281 | 0.006238098 | protein_coding |
| ENSG00000032219 | ARID4A     | 1.150564781 | 0.008314231 | protein_coding |
| ENSG00000206530 | CFAP44     | 1.150975044 | 0.01167195  | protein_coding |
| ENSG00000175471 | MCTP1      | 1.151609118 | 0.034718451 | protein_coding |
| ENSG00000134909 | ARHGAP32   | 1.152626759 | 0.007141562 | protein_coding |
| ENSG00000104447 | TRPS1      | 1.152626759 | 0.007141562 | protein_coding |
| ENSG00000085449 | WDFY1      | 1.152853131 | 0.006453321 | protein_coding |
| ENSG00000163697 | APBB2      | 1.153559123 | 0.007701262 | protein_coding |
| ENSG00000089505 | CMTM1      | 1.155162721 | 0.041652925 | protein_coding |
| ENSG00000129292 | PHF20L1    | 1.155988291 | 0.006330826 | protein_coding |
| ENSG00000152894 | PTPRK      | 1.156077239 | 0.006433773 | protein_coding |
| ENSG00000159023 | EPB41      | 1.156242407 | 0.005580024 | protein_coding |
| ENSG00000180628 | PCGF5      | 1.156345915 | 0.006339729 | protein_coding |
| ENSG00000164023 | SGMS2      | 1.156696565 | 0.007806019 | protein_coding |
| ENSG00000135976 | ANKRD36    | 1.157204349 | 0.008474514 | protein_coding |
| ENSG00000170471 | RALGAPB    | 1.157585041 | 0.005952155 | protein_coding |
| ENSG00000188092 | GPR89B     | 1.158168666 | 0.009288424 | protein_coding |

|                 |          |             |             |                |
|-----------------|----------|-------------|-------------|----------------|
| ENSG00000091157 | WDR7     | 1.159394014 | 0.008953747 | protein_coding |
| ENSG00000197121 | PGAP1    | 1.159667998 | 0.006215736 | protein_coding |
| ENSG00000128923 | MINDY2   | 1.159693343 | 0.007928641 | protein_coding |
| ENSG00000159399 | HK2      | 1.159787905 | 0.00569113  | protein_coding |
| ENSG00000008869 | HEATR5B  | 1.159868867 | 0.006243643 | protein_coding |
| ENSG00000198018 | ENTPD7   | 1.160902875 | 0.006503797 | protein_coding |
| ENSG00000058272 | PPP1R12A | 1.161339235 | 0.005902502 | protein_coding |
| ENSG00000084676 | NCOA1    | 1.161478684 | 0.006262382 | protein_coding |
| ENSG00000171033 | PKIA     | 1.161478684 | 0.006262382 | protein_coding |
| ENSG00000112293 | GPLD1    | 1.161816344 | 0.022901013 | protein_coding |
| ENSG00000198947 | DMD      | 1.161964356 | 0.007235003 | protein_coding |
| ENSG00000254535 | PABPC4L  | 1.162524881 | 0.007143204 | protein_coding |
| ENSG00000197045 | GMFB     | 1.16256989  | 0.005571159 | protein_coding |
| ENSG00000105778 | AVL9     | 1.16272964  | 0.005964546 | protein_coding |
| ENSG00000103657 | HERC1    | 1.162799106 | 0.006001294 | protein_coding |
| ENSG00000101745 | ANKRD12  | 1.163943986 | 0.008162223 | protein_coding |
| ENSG00000153993 | SEMA3D   | 1.164855193 | 0.010938752 | protein_coding |
| ENSG00000118513 | MYB      | 1.164873934 | 0.011851263 | protein_coding |
| ENSG00000120278 | PLEKHG1  | 1.164895273 | 0.012955916 | protein_coding |
| ENSG00000165525 | NEMF     | 1.165582389 | 0.006063089 | protein_coding |
| ENSG00000170873 | MTSS1    | 1.166094893 | 0.009618724 | protein_coding |
| ENSG00000131389 | SLC6A6   | 1.166362297 | 0.0056118   | protein_coding |
| ENSG00000164164 | OTUD4    | 1.166714094 | 0.005536523 | protein_coding |
| ENSG00000108582 | CPD      | 1.166882869 | 0.005320749 | protein_coding |
| ENSG00000145819 | ARHGAP26 | 1.166920814 | 0.007778645 | protein_coding |
| ENSG00000140807 | NKD1     | 1.166965773 | 0.006921836 | protein_coding |
| ENSG00000171940 | ZNF217   | 1.167365064 | 0.007176051 | protein_coding |
| ENSG00000091039 | OSBPL8   | 1.167449015 | 0.005454422 | protein_coding |
| ENSG00000107854 | TNKS2    | 1.167950337 | 0.005435881 | protein_coding |
| ENSG00000171914 | TLN2     | 1.16819193  | 0.007472681 | protein_coding |
| ENSG00000185760 | KCNQ5    | 1.168537605 | 0.008007671 | protein_coding |
| ENSG00000053770 | AP5M1    | 1.169047017 | 0.005876926 | protein_coding |
| ENSG00000048649 | RSF1     | 1.169466621 | 0.00558201  | protein_coding |
| ENSG00000110841 | PPFIBP1  | 1.169650477 | 0.006145153 | protein_coding |
| ENSG00000105877 | DNAH11   | 1.169813831 | 0.012318672 | protein_coding |
| ENSG00000168172 | HOOK3    | 1.169942146 | 0.005595973 | protein_coding |
| ENSG00000089916 | GPATCH2L | 1.169978443 | 0.006072561 | protein_coding |
| ENSG00000175414 | ARL10    | 1.170218889 | 0.005374219 | protein_coding |
| ENSG00000119684 | MLH3     | 1.170522416 | 0.03592403  | protein_coding |
| ENSG00000159496 | RGL4     | 1.170522416 | 0.03592403  | protein_coding |
| ENSG00000143776 | CDC42BPA | 1.170834274 | 0.005197762 | protein_coding |
| ENSG00000084710 | EFR3B    | 1.171150426 | 0.008276617 | protein_coding |
| ENSG00000119139 | TJP2     | 1.172075924 | 0.045931264 | protein_coding |



|                 |          |             |             |                |
|-----------------|----------|-------------|-------------|----------------|
| ENSG00000149212 | SESN3    | 1.172175502 | 0.00550344  | protein_coding |
| ENSG00000143869 | GDF7     | 1.172218601 | 0.007022374 | protein_coding |
| ENSG00000103995 | CEP152   | 1.172276948 | 0.007173549 | protein_coding |
| ENSG00000145416 | 1-Mar    | 1.172532653 | 0.017114431 | protein_coding |
| ENSG00000213079 | SCAF8    | 1.173322456 | 0.005297886 | protein_coding |
| ENSG00000137941 | TTLL7    | 1.17456715  | 0.007615088 | protein_coding |
| ENSG00000221818 | EBF2     | 1.174599644 | 0.015901775 | protein_coding |
| ENSG00000153561 | RMND5A   | 1.175641551 | 0.004948431 | protein_coding |
| ENSG00000121274 | TENT4B   | 1.176200652 | 0.00568697  | protein_coding |
| ENSG00000121879 | PIK3CA   | 1.176897368 | 0.008165538 | protein_coding |
| ENSG00000136925 | TSTD2    | 1.17693208  | 0.00743448  | protein_coding |
| ENSG00000101868 | POLA1    | 1.17701459  | 0.005100946 | protein_coding |
| ENSG00000114857 | NKTR     | 1.177712353 | 0.004923595 | protein_coding |
| ENSG00000001630 | CYP51A1  | 1.178143925 | 0.007751496 | protein_coding |
| ENSG00000024048 | UBR2     | 1.178694749 | 0.005462541 | protein_coding |
| ENSG00000186496 | ZNF396   | 1.181097522 | 0.036582079 | protein_coding |
| ENSG00000115604 | IL18R1   | 1.181355563 | 0.017128527 | protein_coding |
| ENSG00000136731 | UGGT1    | 1.181379007 | 0.004812694 | protein_coding |
| ENSG00000197608 | ZNF841   | 1.181423989 | 0.013159239 | protein_coding |
| ENSG00000163507 | CIP2A    | 1.182855932 | 0.004966228 | protein_coding |
| ENSG00000170017 | ALCAM    | 1.182875091 | 0.004929785 | protein_coding |
| ENSG00000075340 | ADD2     | 1.183081391 | 0.004892911 | protein_coding |
| ENSG00000198862 | LTN1     | 1.184619298 | 0.005332629 | protein_coding |
| ENSG00000080561 | MID2     | 1.186183622 | 0.0052037   | protein_coding |
| ENSG00000100731 | PCNX1    | 1.186900356 | 0.004840491 | protein_coding |
| ENSG00000112309 | B3GAT2   | 1.187242306 | 0.017130461 | protein_coding |
| ENSG00000213533 | STIMATE  | 1.187424216 | 0.02704513  | protein_coding |
| ENSG00000123575 | FAM199X  | 1.188255859 | 0.004436324 | protein_coding |
| ENSG00000156103 | MMP16    | 1.188376235 | 0.009234027 | protein_coding |
| ENSG00000104356 | POP1     | 1.189736023 | 0.004667878 | protein_coding |
| ENSG00000060237 | WNK1     | 1.19016527  | 0.004339058 | protein_coding |
| ENSG00000189127 | ANKRD34B | 1.190190302 | 0.017121806 | protein_coding |
| ENSG00000140090 | SLC24A4  | 1.190462343 | 0.012229212 | protein_coding |
| ENSG00000138735 | PDE5A    | 1.192351752 | 0.007018704 | protein_coding |
| ENSG00000176597 | B3GNT5   | 1.192572339 | 0.008118329 | protein_coding |
| ENSG00000168807 | SNTB2    | 1.193773194 | 0.004718996 | protein_coding |
| ENSG00000092148 | HECTD1   | 1.194357512 | 0.004352082 | protein_coding |
| ENSG00000170113 | NIPA1    | 1.194541882 | 0.005911009 | protein_coding |
| ENSG00000179104 | TMTC2    | 1.195584374 | 0.007861262 | protein_coding |
| ENSG00000196914 | ARHGEF12 | 1.19627792  | 0.004257165 | protein_coding |
| ENSG00000198604 | BAZ1A    | 1.196424767 | 0.004284213 | protein_coding |
| ENSG00000150054 | MPP7     | 1.197051179 | 0.00682873  | protein_coding |
| ENSG00000145725 | PPIP5K2  | 1.197353934 | 0.004707506 | protein_coding |

|                 |          |             |             |                |
|-----------------|----------|-------------|-------------|----------------|
| ENSG00000197102 | DYNC1H1  | 1.197468857 | 0.00405455  | protein_coding |
| ENSG00000107443 | CCNJ     | 1.198222922 | 0.004798515 | protein_coding |
| ENSG00000151458 | ANKRD50  | 1.198650441 | 0.005185987 | protein_coding |
| ENSG00000186908 | ZDHHC17  | 1.199748794 | 0.004711675 | protein_coding |
| ENSG00000120549 | KIAA1217 | 1.199794239 | 0.017131865 | protein_coding |
| ENSG00000169629 | RGPD8    | 1.199794239 | 0.017131865 | protein_coding |
| ENSG00000175893 | ZDHHC21  | 1.20016053  | 0.006163913 | protein_coding |
| ENSG00000143756 | FBXO28   | 1.200616082 | 0.004248241 | protein_coding |
| ENSG00000196247 | ZNF107   | 1.200802243 | 0.005948618 | protein_coding |
| ENSG00000174695 | TMEM167A | 1.201621793 | 0.004282224 | protein_coding |
| ENSG00000169855 | ROBO1    | 1.202280043 | 0.004021017 | protein_coding |
| ENSG00000181690 | PLAG1    | 1.202333617 | 0.00533536  | protein_coding |
| ENSG00000175066 | GK5      | 1.202835212 | 0.004789764 | protein_coding |
| ENSG00000153922 | CHD1     | 1.203241886 | 0.004127184 | protein_coding |
| ENSG00000115525 | ST3GAL5  | 1.203538067 | 0.007525076 | protein_coding |
| ENSG00000196233 | LCOR     | 1.204288371 | 0.004109727 | protein_coding |
| ENSG00000261609 | GAN      | 1.205675207 | 0.004751672 | protein_coding |
| ENSG00000135338 | LCA5     | 1.207304721 | 0.015760642 | protein_coding |
| ENSG00000164190 | NIPBL    | 1.207504999 | 0.004164305 | protein_coding |
| ENSG00000198743 | SLC5A3   | 1.207729782 | 0.004409269 | protein_coding |
| ENSG00000065923 | SLC9A7   | 1.209131091 | 0.005567035 | protein_coding |
| ENSG00000101680 | LAMA1    | 1.209762524 | 0.004488494 | protein_coding |
| ENSG00000116191 | RALGPS2  | 1.212200013 | 0.004120511 | protein_coding |
| ENSG00000163629 | PTPN13   | 1.212205642 | 0.003803323 | protein_coding |
| ENSG00000273136 | NBPF26   | 1.212365977 | 0.017098491 | protein_coding |
| ENSG00000136381 | IREB2    | 1.212575204 | 0.003730048 | protein_coding |
| ENSG00000114450 | GNB4     | 1.214234742 | 0.00419398  | protein_coding |
| ENSG00000197323 | TRIM33   | 1.214324484 | 0.003816026 | protein_coding |
| ENSG00000172493 | AFF1     | 1.214416258 | 0.004203528 | protein_coding |
| ENSG00000140526 | ABHD2    | 1.21461636  | 0.003975886 | protein_coding |
| ENSG00000139737 | SLAIN1   | 1.214736758 | 0.004094524 | protein_coding |
| ENSG00000118007 | STAG1    | 1.214776614 | 0.004162846 | protein_coding |
| ENSG00000069956 | MAPK6    | 1.215022558 | 0.004299137 | protein_coding |
| ENSG00000184675 | AMER1    | 1.215501649 | 0.004255314 | protein_coding |
| ENSG00000079482 | OPHN1    | 1.215598895 | 0.006065334 | protein_coding |
| ENSG00000044524 | EPHA3    | 1.216190894 | 0.006116414 | protein_coding |
| ENSG00000173611 | SCAI     | 1.216505144 | 0.005800395 | protein_coding |
| ENSG00000008086 | CDKL5    | 1.216546975 | 0.007386173 | protein_coding |
| ENSG00000138778 | CENPE    | 1.217066011 | 0.004029999 | protein_coding |
| ENSG00000031081 | ARHGAP31 | 1.217095575 | 0.009728415 | protein_coding |
| ENSG00000137992 | DBT      | 1.217764903 | 0.004333489 | protein_coding |
| ENSG00000139211 | AMIGO2   | 1.219325074 | 0.027887688 | protein_coding |
| ENSG00000070961 | ATP2B1   | 1.219397616 | 0.003681775 | protein_coding |

|                 |          |             |             |                |
|-----------------|----------|-------------|-------------|----------------|
| ENSG00000124151 | NCOA3    | 1.219490819 | 0.004156668 | protein_coding |
| ENSG00000176681 | LRRC37A  | 1.219913934 | 0.021314597 | protein_coding |
| ENSG00000100344 | PNPLA3   | 1.220204794 | 0.004746314 | protein_coding |
| ENSG00000100354 | TNRC6B   | 1.220223675 | 0.00400174  | protein_coding |
| ENSG00000163349 | HIPK1    | 1.221186842 | 0.003671967 | protein_coding |
| ENSG00000132953 | XPO4     | 1.221195423 | 0.003817981 | protein_coding |
| ENSG00000080345 | RIF1     | 1.221205586 | 0.003550965 | protein_coding |
| ENSG00000139354 | GAS2L3   | 1.221291302 | 0.00500998  | protein_coding |
| ENSG00000198648 | STK39    | 1.221862458 | 0.004622279 | protein_coding |
| ENSG00000039560 | RAI14    | 1.224468531 | 0.003652426 | protein_coding |
| ENSG00000086758 | HUWE1    | 1.227579557 | 0.003235186 | protein_coding |
| ENSG00000181827 | RFX7     | 1.228633815 | 0.004267074 | protein_coding |
| ENSG00000163681 | SLMAP    | 1.229958332 | 0.003454346 | protein_coding |
| ENSG00000171865 | RNASEH1  | 1.230066549 | 0.003846212 | protein_coding |
| ENSG00000156299 | TIAM1    | 1.230169601 | 0.003700707 | protein_coding |
| ENSG00000137760 | ALKBH8   | 1.23052485  | 0.004242061 | protein_coding |
| ENSG00000177034 | MTX3     | 1.23053528  | 0.003720145 | protein_coding |
| ENSG00000169213 | RAB3B    | 1.230758535 | 0.005177661 | protein_coding |
| ENSG00000165650 | PDZD8    | 1.230881988 | 0.003464882 | protein_coding |
| ENSG00000101333 | PLCB4    | 1.230887342 | 0.008296396 | protein_coding |
| ENSG00000048707 | VPS13D   | 1.231298783 | 0.003825481 | protein_coding |
| ENSG00000148516 | ZEB1     | 1.2318162   | 0.0042942   | protein_coding |
| ENSG00000119900 | OGFRL1   | 1.232420651 | 0.003761721 | protein_coding |
| ENSG00000006432 | MAP3K9   | 1.232882357 | 0.004430174 | protein_coding |
| ENSG00000151694 | ADAM17   | 1.236190504 | 0.003879697 | protein_coding |
| ENSG00000198369 | SPRED2   | 1.236339287 | 0.005650375 | protein_coding |
| ENSG00000169379 | ARL13B   | 1.237752616 | 0.004093629 | protein_coding |
| ENSG00000154447 | SH3RF1   | 1.237906744 | 0.004755714 | protein_coding |
| ENSG00000173480 | ZNF417   | 1.238970891 | 0.010967701 | protein_coding |
| ENSG00000203667 | COX20    | 1.239225809 | 0.01701213  | protein_coding |
| ENSG00000129595 | EPB41L4A | 1.240337953 | 0.012477586 | protein_coding |
| ENSG00000146197 | SCUBE3   | 1.240337953 | 0.012477586 | protein_coding |
| ENSG00000154080 | CHST9    | 1.240340583 | 0.019009984 | protein_coding |
| ENSG00000078269 | SYNJ2    | 1.240590326 | 0.003855677 | protein_coding |
| ENSG00000176018 | LYSMD3   | 1.24119635  | 0.003594807 | protein_coding |
| ENSG00000123200 | ZC3H13   | 1.241445629 | 0.003104751 | protein_coding |
| ENSG00000150764 | DIXDC1   | 1.241550867 | 0.003976638 | protein_coding |
| ENSG00000138018 | SELENOI  | 1.241948556 | 0.003047558 | protein_coding |
| ENSG00000128567 | PODXL    | 1.242040252 | 0.003639436 | protein_coding |
| ENSG00000056097 | ZFR      | 1.243592718 | 0.002979233 | protein_coding |
| ENSG00000156802 | ATAD2    | 1.243602927 | 0.003133252 | protein_coding |
| ENSG00000129317 | PUS7L    | 1.243644719 | 0.003327774 | protein_coding |
| ENSG00000080298 | RFX3     | 1.244348355 | 0.010264258 | protein_coding |

|                 |          |             |             |                |
|-----------------|----------|-------------|-------------|----------------|
| ENSG00000057294 | PKP2     | 1.24456974  | 0.003809524 | protein_coding |
| ENSG00000115183 | TANC1    | 1.24493668  | 0.003401525 | protein_coding |
| ENSG00000119912 | IDE      | 1.247189455 | 0.003100366 | protein_coding |
| ENSG00000204519 | ZNF551   | 1.247762422 | 0.006049189 | protein_coding |
| ENSG00000136928 | GABBR2   | 1.247866859 | 0.017035557 | protein_coding |
| ENSG00000116406 | EDEM3    | 1.248399434 | 0.00316659  | protein_coding |
| ENSG00000047365 | ARAP2    | 1.24948925  | 0.00766319  | protein_coding |
| ENSG00000112297 | CRYBG1   | 1.249572428 | 0.034842559 | protein_coding |
| ENSG00000149308 | NPAT     | 1.250045934 | 0.003548928 | protein_coding |
| ENSG00000108510 | MED13    | 1.250357647 | 0.003022885 | protein_coding |
| ENSG00000100592 | DAAM1    | 1.251011066 | 0.003567302 | protein_coding |
| ENSG00000067992 | PKD3     | 1.251072865 | 0.003801391 | protein_coding |
| ENSG00000139324 | TMTC3    | 1.251701952 | 0.003142383 | protein_coding |
| ENSG00000143195 | ILDR2    | 1.252976645 | 0.00473243  | protein_coding |
| ENSG00000130038 | CRACR2A  | 1.253546532 | 0.00570038  | protein_coding |
| ENSG00000197044 | ZNF441   | 1.253635819 | 0.021553211 | protein_coding |
| ENSG00000077157 | PPP1R12B | 1.254047072 | 0.003535271 | protein_coding |
| ENSG00000152270 | PDE3B    | 1.254146812 | 0.003169466 | protein_coding |
| ENSG00000170537 | TMC7     | 1.254275868 | 0.012341791 | protein_coding |
| ENSG00000198087 | CD2AP    | 1.254631883 | 0.002937117 | protein_coding |
| ENSG00000180626 | ZNF594   | 1.254805944 | 0.005302615 | protein_coding |
| ENSG00000147526 | TACC1    | 1.255070993 | 0.003200811 | protein_coding |
| ENSG00000166750 | SLFN5    | 1.257389961 | 0.010923125 | protein_coding |
| ENSG00000149311 | ATM      | 1.257771656 | 0.002926852 | protein_coding |
| ENSG00000179295 | PTPN11   | 1.258568774 | 0.002591764 | protein_coding |
| ENSG00000174469 | CNTNAP2  | 1.258848998 | 0.003020605 | protein_coding |
| ENSG00000033867 | SLC4A7   | 1.259534871 | 0.003162945 | protein_coding |
| ENSG00000169554 | ZEB2     | 1.259727227 | 0.003543923 | protein_coding |
| ENSG00000118200 | CAMSAP2  | 1.259877317 | 0.002786698 | protein_coding |
| ENSG00000162139 | NEU3     | 1.26046636  | 0.003152465 | protein_coding |
| ENSG00000135968 | GCC2     | 1.261308723 | 0.003030894 | protein_coding |
| ENSG00000102189 | EEA1     | 1.261315999 | 0.00336665  | protein_coding |
| ENSG00000159140 | SON      | 1.261723673 | 0.002512339 | protein_coding |
| ENSG00000187605 | TET3     | 1.262222047 | 0.002934861 | protein_coding |
| ENSG00000137561 | TTPA     | 1.262325878 | 0.049028188 | protein_coding |
| ENSG00000159082 | SYNJ1    | 1.263441995 | 0.003879575 | protein_coding |
| ENSG00000134278 | SPIRE1   | 1.263709383 | 0.003271053 | protein_coding |
| ENSG00000173889 | PHC3     | 1.264004919 | 0.003479319 | protein_coding |
| ENSG00000038382 | TRIO     | 1.26591638  | 0.002582354 | protein_coding |
| ENSG00000186462 | NAPIL2   | 1.267522672 | 0.035481962 | protein_coding |
| ENSG00000182253 | SYNM     | 1.267621855 | 0.006778375 | protein_coding |
| ENSG00000119314 | PTBP3    | 1.268557653 | 0.002531559 | protein_coding |
| ENSG00000183723 | CMTM4    | 1.269250812 | 0.002514189 | protein_coding |

|                 |           |             |             |                |
|-----------------|-----------|-------------|-------------|----------------|
| ENSG00000204186 | ZDBF2     | 1.270602917 | 0.002901067 | protein_coding |
| ENSG00000163714 | U2SURP    | 1.27093422  | 0.002340693 | protein_coding |
| ENSG00000132466 | ANKRD17   | 1.271913133 | 0.002379147 | protein_coding |
| ENSG00000129003 | VPS13C    | 1.272285642 | 0.003020387 | protein_coding |
| ENSG00000156273 | BACH1     | 1.272816113 | 0.003174928 | protein_coding |
| ENSG00000168702 | LRP1B     | 1.273383188 | 0.013848142 | protein_coding |
| ENSG00000101384 | JAG1      | 1.273443495 | 0.006305941 | protein_coding |
| ENSG00000075391 | RASAL2    | 1.273856134 | 0.002849171 | protein_coding |
| ENSG00000145391 | SETD7     | 1.274193071 | 0.002355438 | protein_coding |
| ENSG00000117724 | CENPF     | 1.274412535 | 0.002283339 | protein_coding |
| ENSG00000143951 | WDPCP     | 1.274967172 | 0.011287195 | protein_coding |
| ENSG00000107290 | SETX      | 1.276361575 | 0.002545998 | protein_coding |
| ENSG00000171502 | COL24A1   | 1.276637702 | 0.013676595 | protein_coding |
| ENSG00000213694 | S1PR3     | 1.277273111 | 0.005828011 | protein_coding |
| ENSG00000198589 | LRBA      | 1.278382383 | 0.002397096 | protein_coding |
| ENSG00000139292 | LGR5      | 1.278965769 | 0.00450753  | protein_coding |
| ENSG00000187068 | C3orf70   | 1.280266744 | 0.009874341 | protein_coding |
| ENSG00000134982 | APC       | 1.281961651 | 0.002561151 | protein_coding |
| ENSG00000177570 | SAMD12    | 1.28387792  | 0.013765123 | protein_coding |
| ENSG00000170325 | PRDM10    | 1.284546675 | 0.003221749 | protein_coding |
| ENSG00000167377 | ZNF23     | 1.284610776 | 0.016874371 | protein_coding |
| ENSG00000138758 | 11-Sep    | 1.285211017 | 0.002121439 | protein_coding |
| ENSG00000164930 | FZD6      | 1.286137234 | 0.003251821 | protein_coding |
| ENSG00000089682 | RBM41     | 1.28637593  | 0.002710795 | protein_coding |
| ENSG00000153904 | DDAH1     | 1.287274514 | 0.002456858 | protein_coding |
| ENSG00000143702 | CEP170    | 1.287388694 | 0.002161066 | protein_coding |
| ENSG00000196712 | NF1       | 1.287392021 | 0.002272214 | protein_coding |
| ENSG00000073712 | FERMT2    | 1.287505758 | 0.002313751 | protein_coding |
| ENSG00000258102 | MAP1LC3B2 | 1.287936013 | 0.013582069 | protein_coding |
| ENSG00000115084 | SLC35F5   | 1.287978336 | 0.002790225 | protein_coding |
| ENSG00000144909 | OSBPL11   | 1.29051358  | 0.002407419 | protein_coding |
| ENSG00000133687 | TMTC1     | 1.291801343 | 0.003205838 | protein_coding |
| ENSG00000183091 | NEB       | 1.292046702 | 0.029542889 | protein_coding |
| ENSG00000148358 | GPR107    | 1.294162403 | 0.002131069 | protein_coding |
| ENSG00000123066 | MED13L    | 1.295392249 | 0.002136913 | protein_coding |
| ENSG00000163637 | PRICKLE2  | 1.295396959 | 0.021782468 | protein_coding |
| ENSG00000117523 | PRRC2C    | 1.296027494 | 0.001919239 | protein_coding |
| ENSG00000138756 | BMP2K     | 1.299141356 | 0.003796442 | protein_coding |
| ENSG00000126070 | AGO3      | 1.299560112 | 0.002407141 | protein_coding |
| ENSG00000166025 | AMOTL1    | 1.299561867 | 0.002008676 | protein_coding |
| ENSG00000162722 | TRIM58    | 1.299850236 | 0.030298791 | protein_coding |
| ENSG00000051341 | POLQ      | 1.300360311 | 0.002320423 | protein_coding |
| ENSG00000115977 | AAK1      | 1.300863771 | 0.002555936 | protein_coding |

|                 |           |             |             |                |
|-----------------|-----------|-------------|-------------|----------------|
| ENSG00000196628 | TCF4      | 1.302774644 | 0.002259881 | protein_coding |
| ENSG00000153107 | ANAPC1    | 1.305116302 | 0.001880104 | protein_coding |
| ENSG00000243156 | MICAL3    | 1.306107684 | 0.002085984 | protein_coding |
| ENSG00000091844 | RGS17     | 1.306174247 | 0.00395452  | protein_coding |
| ENSG00000196110 | ZNF699    | 1.307942343 | 0.040101413 | protein_coding |
| ENSG00000110427 | KIAA1549L | 1.308314513 | 0.00299219  | protein_coding |
| ENSG00000170153 | RNF150    | 1.310072675 | 0.002181483 | protein_coding |
| ENSG00000151116 | UEVLD     | 1.310681038 | 0.004425893 | protein_coding |
| ENSG00000082805 | ERC1      | 1.310857736 | 0.001928541 | protein_coding |
| ENSG00000152056 | AP1S3     | 1.311187382 | 0.003209325 | protein_coding |
| ENSG00000101596 | SMCHD1    | 1.311595439 | 0.001908598 | protein_coding |
| ENSG00000134318 | ROCK2     | 1.311880345 | 0.001909946 | protein_coding |
| ENSG00000162378 | ZYG11B    | 1.31277731  | 0.001997961 | protein_coding |
| ENSG00000150995 | ITPR1     | 1.312921517 | 0.002602824 | protein_coding |
| ENSG00000023516 | AKAP11    | 1.314214116 | 0.001948325 | protein_coding |
| ENSG00000118058 | KMT2A     | 1.314377573 | 0.001744004 | protein_coding |
| ENSG00000065613 | SLK       | 1.314496428 | 0.00174504  | protein_coding |
| ENSG00000104067 | TJP1      | 1.314800684 | 0.001940283 | protein_coding |
| ENSG00000112249 | ASCC3     | 1.31593227  | 0.001819647 | protein_coding |
| ENSG00000140396 | NCOA2     | 1.316768288 | 0.001974792 | protein_coding |
| ENSG00000129422 | MTUS1     | 1.317931617 | 0.002524632 | protein_coding |
| ENSG00000060749 | QSER1     | 1.31797037  | 0.001759877 | protein_coding |
| ENSG00000138448 | ITGAV     | 1.321079609 | 0.001937253 | protein_coding |
| ENSG00000182866 | LCK       | 1.321281194 | 0.030695741 | protein_coding |
| ENSG00000094975 | SUCO      | 1.321763425 | 0.001789976 | protein_coding |
| ENSG00000124251 | TP53TG5   | 1.322356415 | 0.046163285 | protein_coding |
| ENSG00000101746 | NOL4      | 1.322791584 | 0.00868018  | protein_coding |
| ENSG00000091656 | ZFHX4     | 1.323485821 | 0.001905143 | protein_coding |
| ENSG00000204217 | BMPR2     | 1.32406381  | 0.001861793 | protein_coding |
| ENSG00000134250 | NOTCH2    | 1.326804877 | 0.001536936 | protein_coding |
| ENSG00000092531 | SNAP23    | 1.326872366 | 0.004091456 | protein_coding |
| ENSG00000198597 | ZNF536    | 1.327031184 | 0.003259596 | protein_coding |
| ENSG00000164151 | ICE1      | 1.32933756  | 0.001627379 | protein_coding |
| ENSG00000095564 | BTAFL     | 1.329934127 | 0.001557033 | protein_coding |
| ENSG00000143479 | DYRK3     | 1.330727411 | 0.002318466 | protein_coding |
| ENSG00000116132 | PRRX1     | 1.330997078 | 0.010994238 | protein_coding |
| ENSG00000165997 | ARL5B     | 1.331650203 | 0.001589295 | protein_coding |
| ENSG00000128000 | ZNF780B   | 1.333586029 | 0.00489751  | protein_coding |
| ENSG00000167637 | ZNF283    | 1.334518408 | 0.004302505 | protein_coding |
| ENSG00000141424 | SLC39A6   | 1.338610138 | 0.001430901 | protein_coding |
| ENSG00000136874 | STX17     | 1.338662448 | 0.002432595 | protein_coding |
| ENSG00000138593 | SECISBP2L | 1.338702357 | 0.002257411 | protein_coding |
| ENSG00000129167 | TPH1      | 1.339444877 | 0.040993521 | protein_coding |

|                 |          |             |             |                |
|-----------------|----------|-------------|-------------|----------------|
| ENSG00000146859 | TMEM140  | 1.33996799  | 0.002333097 | protein_coding |
| ENSG00000139220 | PPFIA2   | 1.34047278  | 0.025675336 | protein_coding |
| ENSG00000143322 | ABL2     | 1.343899557 | 0.001468436 | protein_coding |
| ENSG00000111961 | SASH1    | 1.344340781 | 0.001696407 | protein_coding |
| ENSG00000153827 | TRIP12   | 1.345138649 | 0.001339954 | protein_coding |
| ENSG00000048405 | ZNF800   | 1.348389785 | 0.001984889 | protein_coding |
| ENSG00000065534 | MYLK     | 1.348900802 | 0.002712831 | protein_coding |
| ENSG00000157741 | UBN2     | 1.3489697   | 0.001494564 | protein_coding |
| ENSG00000083168 | KAT6A    | 1.350424799 | 0.001378741 | protein_coding |
| ENSG00000164236 | ANKRD33B | 1.353053287 | 0.002047218 | protein_coding |
| ENSG00000183718 | TRIM52   | 1.353240506 | 0.001808726 | protein_coding |
| ENSG00000257093 | KIAA1147 | 1.354784439 | 0.001300362 | protein_coding |
| ENSG00000187079 | TEAD1    | 1.355554067 | 0.001365024 | protein_coding |
| ENSG00000086570 | FAT2     | 1.355666968 | 0.018991473 | protein_coding |
| ENSG00000187240 | DYNC2H1  | 1.356452227 | 0.001328441 | protein_coding |
| ENSG00000198707 | CEP290   | 1.357207935 | 0.001541717 | protein_coding |
| ENSG00000151617 | EDNRA    | 1.357619694 | 0.003522678 | protein_coding |
| ENSG00000183044 | ABAT     | 1.358898563 | 0.002277639 | protein_coding |
| ENSG00000145703 | IQGAP2   | 1.36007383  | 0.001531074 | protein_coding |
| ENSG00000188994 | ZNF292   | 1.360527512 | 0.00162678  | protein_coding |
| ENSG00000144824 | PHLDB2   | 1.362722229 | 0.00189671  | protein_coding |
| ENSG00000132938 | MTUS2    | 1.36285093  | 0.038410682 | protein_coding |
| ENSG00000221843 | C2orf16  | 1.366131116 | 0.008838507 | protein_coding |
| ENSG00000058063 | ATP11B   | 1.366674414 | 0.00136989  | protein_coding |
| ENSG00000134852 | CLOCK    | 1.368332891 | 0.001530874 | protein_coding |
| ENSG00000137968 | SLC44A5  | 1.369008817 | 0.00200933  | protein_coding |
| ENSG00000188738 | FSIP2    | 1.369543206 | 0.02203199  | protein_coding |
| ENSG00000123636 | BAZ2B    | 1.369990474 | 0.002313244 | protein_coding |
| ENSG00000170456 | DENND5B  | 1.370049169 | 0.001439554 | protein_coding |
| ENSG00000172915 | NBEA     | 1.370195642 | 0.002051901 | protein_coding |
| ENSG00000010818 | HIVEP2   | 1.371085209 | 0.001614058 | protein_coding |
| ENSG00000120868 | APAF1    | 1.373579251 | 0.001377125 | protein_coding |
| ENSG00000100580 | TMED8    | 1.374221968 | 0.001140051 | protein_coding |
| ENSG00000138829 | FBN2     | 1.374717329 | 0.001072353 | protein_coding |
| ENSG00000141449 | GREB1L   | 1.376566229 | 0.001192915 | protein_coding |
| ENSG00000088387 | DOCK9    | 1.377427196 | 0.001388758 | protein_coding |
| ENSG00000066084 | DIP2B    | 1.378392983 | 0.001120922 | protein_coding |
| ENSG00000091409 | ITGA6    | 1.378875656 | 0.001468922 | protein_coding |
| ENSG00000180008 | SOCS4    | 1.37980562  | 0.001153415 | protein_coding |
| ENSG00000169760 | NLGN1    | 1.380395829 | 0.00220407  | protein_coding |
| ENSG00000154153 | RETREG1  | 1.381980396 | 0.003129389 | protein_coding |
| ENSG00000213949 | ITGA1    | 1.382427664 | 0.002177706 | protein_coding |
| ENSG00000114805 | PLCH1    | 1.382660314 | 0.001662164 | protein_coding |

|                 |           |             |             |                |
|-----------------|-----------|-------------|-------------|----------------|
| ENSG00000169116 | PARM1     | 1.382660698 | 0.001830807 | protein_coding |
| ENSG00000163328 | GPR155    | 1.385189214 | 0.001835247 | protein_coding |
| ENSG00000111647 | UHRF1BP1L | 1.385453945 | 0.001283402 | protein_coding |
| ENSG00000164742 | ADCY1     | 1.385921812 | 0.001146011 | protein_coding |
| ENSG00000170743 | SYT9      | 1.386550912 | 0.033173684 | protein_coding |
| ENSG00000130779 | CLIP1     | 1.386734427 | 0.001101247 | protein_coding |
| ENSG00000131019 | ULBP3     | 1.38689479  | 0.002997333 | protein_coding |
| ENSG00000103064 | SLC7A6    | 1.38748454  | 0.001130026 | protein_coding |
| ENSG00000169871 | TRIM56    | 1.387703987 | 0.001751714 | protein_coding |
| ENSG00000083857 | FAT1      | 1.388148698 | 0.001007604 | protein_coding |
| ENSG00000116991 | SIPA1L2   | 1.388805354 | 0.001183196 | protein_coding |
| ENSG00000163428 | LRRC58    | 1.389553607 | 0.00095226  | protein_coding |
| ENSG00000170921 | TANC2     | 1.39072382  | 0.001116803 | protein_coding |
| ENSG00000127914 | AKAP9     | 1.393355622 | 0.001079737 | protein_coding |
| ENSG00000151914 | DST       | 1.393563213 | 0.000985145 | protein_coding |
| ENSG00000096696 | DSP       | 1.393673346 | 0.000889575 | protein_coding |
| ENSG00000155850 | SLC26A2   | 1.393816551 | 0.001107355 | protein_coding |
| ENSG00000145147 | SLIT2     | 1.393909626 | 0.000916878 | protein_coding |
| ENSG00000196417 | ZNF765    | 1.394121677 | 0.002840449 | protein_coding |
| ENSG00000164309 | CMYA5     | 1.395063713 | 0.039238489 | protein_coding |
| ENSG00000065361 | ERBB3     | 1.395290267 | 0.002994583 | protein_coding |
| ENSG00000123908 | AGO2      | 1.395378752 | 0.000903201 | protein_coding |
| ENSG00000053254 | FOXN3     | 1.397061988 | 0.001074531 | protein_coding |
| ENSG00000066739 | ATG2B     | 1.39716328  | 0.001028425 | protein_coding |
| ENSG00000174373 | RALGAPA1  | 1.39743726  | 0.001103594 | protein_coding |
| ENSG00000164251 | F2RL1     | 1.397546457 | 0.001357072 | protein_coding |
| ENSG00000180660 | MAB21L1   | 1.398039412 | 0.018902448 | protein_coding |
| ENSG00000096968 | JAK2      | 1.39923931  | 0.002975043 | protein_coding |
| ENSG00000151806 | GUF1      | 1.399311383 | 0.00105104  | protein_coding |
| ENSG00000135333 | EPHA7     | 1.399512186 | 0.001028039 | protein_coding |
| ENSG00000155846 | PPARGC1B  | 1.402527532 | 0.000958942 | protein_coding |
| ENSG00000132405 | TBC1D14   | 1.405553177 | 0.001024446 | protein_coding |
| ENSG00000083097 | DOP1A     | 1.407857083 | 0.0012748   | protein_coding |
| ENSG00000100505 | TRIM9     | 1.409643913 | 0.001152358 | protein_coding |
| ENSG00000106261 | ZKSCAN1   | 1.410006062 | 0.000889163 | protein_coding |
| ENSG00000110395 | CBL       | 1.410257773 | 0.000865736 | protein_coding |
| ENSG00000188647 | PTAR1     | 1.410325411 | 0.000893112 | protein_coding |
| ENSG00000115808 | STRN      | 1.413357164 | 0.000888161 | protein_coding |
| ENSG00000197472 | ZNF695    | 1.413670443 | 0.022113468 | protein_coding |
| ENSG00000093217 | XYLB      | 1.415238841 | 0.001087881 | protein_coding |
| ENSG00000178917 | ZNF852    | 1.416905977 | 0.004026014 | protein_coding |
| ENSG00000158528 | PPP1R9A   | 1.417921867 | 0.0026832   | protein_coding |
| ENSG00000067900 | ROCK1     | 1.417963046 | 0.000783589 | protein_coding |



|                 |          |             |             |                |
|-----------------|----------|-------------|-------------|----------------|
| ENSG00000125686 | MED1     | 1.417965999 | 0.000769038 | protein_coding |
| ENSG00000137812 | KNL1     | 1.418578081 | 0.000891411 | protein_coding |
| ENSG00000115306 | SPTBN1   | 1.420025259 | 0.000723409 | protein_coding |
| ENSG00000164715 | LMTK2    | 1.420103713 | 0.000884505 | protein_coding |
| ENSG00000114439 | BBX      | 1.420653416 | 0.00076483  | protein_coding |
| ENSG00000106086 | PLEKHA8  | 1.421915785 | 0.000864017 | protein_coding |
| ENSG00000127603 | MACF1    | 1.422167022 | 0.000726481 | protein_coding |
| ENSG00000182141 | ZNF708   | 1.422672557 | 0.002291731 | protein_coding |
| ENSG00000058668 | ATP2B4   | 1.423079493 | 0.00084901  | protein_coding |
| ENSG00000173930 | SLCO4C1  | 1.425983644 | 0.016215654 | protein_coding |
| ENSG00000048740 | CELF2    | 1.427929663 | 0.000849472 | protein_coding |
| ENSG00000113658 | SMAD5    | 1.428140649 | 0.000703288 | protein_coding |
| ENSG00000103994 | ZNF106   | 1.428656509 | 0.000737839 | protein_coding |
| ENSG00000127481 | UBR4     | 1.431306342 | 0.000661028 | protein_coding |
| ENSG00000106714 | CNTNAP3  | 1.433718867 | 0.001920418 | protein_coding |
| ENSG00000177311 | ZBTB38   | 1.4339114   | 0.000995527 | protein_coding |
| ENSG00000263001 | GTF2I    | 1.433983448 | 0.000671257 | protein_coding |
| ENSG00000167548 | KMT2D    | 1.434135573 | 0.000634666 | protein_coding |
| ENSG00000196391 | ZNF774   | 1.434507728 | 0.002136254 | protein_coding |
| ENSG00000112893 | MAN2A1   | 1.434749365 | 0.000851112 | protein_coding |
| ENSG00000137145 | DENND4C  | 1.434942865 | 0.000900819 | protein_coding |
| ENSG00000197535 | MYO5A    | 1.437068109 | 0.000812815 | protein_coding |
| ENSG00000072364 | AFF4     | 1.437497583 | 0.000677711 | protein_coding |
| ENSG00000214029 | ZNF891   | 1.437932546 | 0.001296262 | protein_coding |
| ENSG00000163960 | UBXN7    | 1.438554842 | 0.000694268 | protein_coding |
| ENSG00000172869 | DMXL1    | 1.438794507 | 0.000827875 | protein_coding |
| ENSG00000038219 | BOD1L1   | 1.440017267 | 0.00070418  | protein_coding |
| ENSG00000164199 | ADGRV1   | 1.442616119 | 0.001114626 | protein_coding |
| ENSG00000003989 | SLC7A2   | 1.44274108  | 0.000656907 | protein_coding |
| ENSG00000165185 | KIAA1958 | 1.443526931 | 0.00086897  | protein_coding |
| ENSG00000134709 | HOOK1    | 1.445799753 | 0.000669691 | protein_coding |
| ENSG00000169499 | PLEKHA2  | 1.447323388 | 0.001820048 | protein_coding |
| ENSG00000165105 | RASEF    | 1.448227086 | 0.000763221 | protein_coding |
| ENSG00000075223 | SEMA3C   | 1.448589384 | 0.001616556 | protein_coding |
| ENSG00000174197 | MGA      | 1.4489608   | 0.000636936 | protein_coding |
| ENSG00000166833 | NAV2     | 1.45040959  | 0.00209876  | protein_coding |
| ENSG00000118193 | KIF14    | 1.450580429 | 0.000645856 | protein_coding |
| ENSG00000144674 | GOLGA4   | 1.451469652 | 0.000598131 | protein_coding |
| ENSG00000152495 | CAMK4    | 1.45202491  | 0.001299058 | protein_coding |
| ENSG00000054523 | KIF1B    | 1.452519995 | 0.00060047  | protein_coding |
| ENSG00000137502 | RAB30    | 1.452798921 | 0.001947286 | protein_coding |
| ENSG00000203668 | CHML     | 1.454257351 | 0.000559216 | protein_coding |
| ENSG00000124177 | CHD6     | 1.455200546 | 0.000634542 | protein_coding |

|                 |          |             |             |                |
|-----------------|----------|-------------|-------------|----------------|
| ENSG00000085563 | ABCB1    | 1.458296611 | 0.001297139 | protein_coding |
| ENSG00000075539 | FRYL     | 1.458598876 | 0.000815624 | protein_coding |
| ENSG00000153201 | RANBP2   | 1.459565837 | 0.000521798 | protein_coding |
| ENSG00000083312 | TNPO1    | 1.461451784 | 0.000499952 | protein_coding |
| ENSG00000184305 | CCSER1   | 1.461701009 | 0.006876664 | protein_coding |
| ENSG00000179240 | GVQW3    | 1.462041413 | 0.001668912 | protein_coding |
| ENSG00000164684 | ZNF704   | 1.463419888 | 0.000560617 | protein_coding |
| ENSG00000167306 | MYO5B    | 1.463824232 | 0.001757906 | protein_coding |
| ENSG00000162409 | PRKAA2   | 1.466117602 | 0.00057315  | protein_coding |
| ENSG00000038427 | VCAN     | 1.466711263 | 0.000547947 | protein_coding |
| ENSG00000138336 | TET1     | 1.468057455 | 0.000720364 | protein_coding |
| ENSG00000144645 | OSBPL10  | 1.469138724 | 0.001189141 | protein_coding |
| ENSG00000009694 | TENM1    | 1.470691607 | 0.00082607  | protein_coding |
| ENSG00000144339 | TMEFF2   | 1.472633245 | 0.043692991 | protein_coding |
| ENSG00000083223 | TUT7     | 1.473471943 | 0.000715676 | protein_coding |
| ENSG00000143970 | ASXL2    | 1.4738572   | 0.000563292 | protein_coding |
| ENSG00000145555 | MYO10    | 1.473890608 | 0.000527703 | protein_coding |
| ENSG00000198948 | MFAP3L   | 1.474402862 | 0.000924416 | protein_coding |
| ENSG00000132549 | VPS13B   | 1.474879939 | 0.000625583 | protein_coding |
| ENSG00000139496 | NUP58    | 1.474945977 | 0.000484452 | protein_coding |
| ENSG00000153207 | AHCTF1   | 1.474950312 | 0.000497448 | protein_coding |
| ENSG00000005249 | PRKAR2B  | 1.47514382  | 0.000607829 | protein_coding |
| ENSG00000186472 | PCLO     | 1.475619869 | 0.001125185 | protein_coding |
| ENSG00000170759 | KIF5B    | 1.476699713 | 0.000453282 | protein_coding |
| ENSG00000146247 | PHIP     | 1.47697632  | 0.000498543 | protein_coding |
| ENSG00000072858 | SIDT1    | 1.477222275 | 0.026682384 | protein_coding |
| ENSG00000162402 | USP24    | 1.479521646 | 0.00043611  | protein_coding |
| ENSG00000136111 | TBC1D4   | 1.482050673 | 0.000424901 | protein_coding |
| ENSG00000085224 | ATRX     | 1.482460431 | 0.000458415 | protein_coding |
| ENSG00000112246 | SIM1     | 1.483002437 | 0.003585358 | protein_coding |
| ENSG00000184384 | MAML2    | 1.483301032 | 0.002967311 | protein_coding |
| ENSG00000152601 | MBNL1    | 1.484685649 | 0.000470307 | protein_coding |
| ENSG00000124198 | ARFGEF2  | 1.486249645 | 0.000483795 | protein_coding |
| ENSG00000144357 | UBR3     | 1.489042889 | 0.000514864 | protein_coding |
| ENSG00000198162 | MAN1A2   | 1.49146366  | 0.000449887 | protein_coding |
| ENSG00000159459 | UBR1     | 1.492695436 | 0.000590106 | protein_coding |
| ENSG00000174718 | KIAA1551 | 1.492816212 | 0.000750605 | protein_coding |
| ENSG00000182263 | FIGN     | 1.493163535 | 0.000809177 | protein_coding |
| ENSG00000160218 | TRAPPC10 | 1.494568698 | 0.000511676 | protein_coding |
| ENSG00000152104 | PTPN14   | 1.49516858  | 0.000427819 | protein_coding |
| ENSG00000164506 | STXBP5   | 1.495172462 | 0.000567517 | protein_coding |
| ENSG00000171488 | LRRC8C   | 1.495655204 | 0.000592921 | protein_coding |
| ENSG00000115355 | CCDC88A  | 1.496284693 | 0.000441979 | protein_coding |

|                 |          |             |             |                |
|-----------------|----------|-------------|-------------|----------------|
| ENSG00000145246 | ATP10D   | 1.497614731 | 0.001196827 | protein_coding |
| ENSG00000068796 | KIF2A    | 1.498086912 | 0.000412272 | protein_coding |
| ENSG00000112144 | ICK      | 1.500948431 | 0.000503528 | protein_coding |
| ENSG00000115760 | BIRC6    | 1.501314148 | 0.000383074 | protein_coding |
| ENSG00000154556 | SORBS2   | 1.502360967 | 0.005858889 | protein_coding |
| ENSG00000160551 | TAOK1    | 1.504119281 | 0.000376958 | protein_coding |
| ENSG00000145715 | RASA1    | 1.504165756 | 0.000498026 | protein_coding |
| ENSG00000051825 | MPHOSPH9 | 1.50451694  | 0.0004173   | protein_coding |
| ENSG00000155657 | TTN      | 1.505743027 | 0.000632275 | protein_coding |
| ENSG00000188906 | LRRK2    | 1.507880476 | 0.011696955 | protein_coding |
| ENSG00000078687 | TNRC6C   | 1.50796655  | 0.000517891 | protein_coding |
| ENSG00000178662 | CSRN3P   | 1.508459471 | 0.001305356 | protein_coding |
| ENSG00000009413 | REV3L    | 1.508509036 | 0.000438028 | protein_coding |
| ENSG00000122008 | POLK     | 1.508595117 | 0.000616516 | protein_coding |
| ENSG00000143355 | LHX9     | 1.509196723 | 0.013488043 | protein_coding |
| ENSG00000122545 | 7-Sep    | 1.510231799 | 0.00035993  | protein_coding |
| ENSG00000197822 | OCLN     | 1.51055612  | 0.000665918 | protein_coding |
| ENSG00000105971 | CAV2     | 1.510593829 | 0.000704118 | protein_coding |
| ENSG00000164070 | HSPA4L   | 1.510961314 | 0.000371008 | protein_coding |
| ENSG00000064393 | HIPK2    | 1.512129909 | 0.000343472 | protein_coding |
| ENSG00000163959 | SLC51A   | 1.512383522 | 0.015487289 | protein_coding |
| ENSG00000164008 | C1orf50  | 1.512710189 | 0.002916468 | protein_coding |
| ENSG00000099204 | ABLM1    | 1.513884252 | 0.000346694 | protein_coding |
| ENSG00000102385 | DRP2     | 1.51433776  | 0.018332243 | protein_coding |
| ENSG00000164300 | SERINC5  | 1.514732025 | 0.000704118 | protein_coding |
| ENSG00000100503 | NIN      | 1.516174706 | 0.000336437 | protein_coding |
| ENSG00000116539 | ASH1L    | 1.51795609  | 0.000354458 | protein_coding |
| ENSG00000102384 | CENPI    | 1.523328938 | 0.000455588 | protein_coding |
| ENSG00000185483 | ROR1     | 1.523876553 | 0.000529526 | protein_coding |
| ENSG00000173320 | STOX2    | 1.524453756 | 0.000533085 | protein_coding |
| ENSG00000053524 | MCF2L2   | 1.526381376 | 0.026720022 | protein_coding |
| ENSG00000100697 | DICER1   | 1.526740099 | 0.000300756 | protein_coding |
| ENSG00000055609 | KMT2C    | 1.526973754 | 0.000324524 | protein_coding |
| ENSG00000100147 | CCDC134  | 1.528624385 | 0.000932164 | protein_coding |
| ENSG00000163625 | WDFY3    | 1.529090855 | 0.000368542 | protein_coding |
| ENSG00000181450 | ZNF678   | 1.529464692 | 0.00036904  | protein_coding |
| ENSG00000128512 | DOCK4    | 1.529935088 | 0.000494434 | protein_coding |
| ENSG00000138246 | DNAJC13  | 1.530608447 | 0.000328102 | protein_coding |
| ENSG00000005100 | DHX33    | 1.531905824 | 0.000284731 | protein_coding |
| ENSG00000171444 | MCC      | 1.532198613 | 0.000339791 | protein_coding |
| ENSG00000196584 | XRCC2    | 1.533421851 | 0.000293343 | protein_coding |
| ENSG00000169330 | KIAA1024 | 1.535378704 | 0.000903621 | protein_coding |
| ENSG00000198932 | GPRASP1  | 1.537388931 | 0.044489089 | protein_coding |

|                 |            |             |             |                |
|-----------------|------------|-------------|-------------|----------------|
| ENSG00000101752 | MIB1       | 1.538507803 | 0.000270912 | protein_coding |
| ENSG00000160352 | ZNF714     | 1.539256826 | 0.000339808 | protein_coding |
| ENSG00000143858 | SYT2       | 1.540152201 | 0.000828899 | protein_coding |
| ENSG00000128965 | CHAC1      | 1.544735755 | 0.000676564 | protein_coding |
| ENSG00000146072 | TNFRSF21   | 1.544876866 | 0.000366539 | protein_coding |
| ENSG00000241697 | TMEFF1     | 1.545407546 | 0.001553639 | protein_coding |
| ENSG00000152527 | PLEKHH2    | 1.546915204 | 0.000802826 | protein_coding |
| ENSG00000197603 | CPLANE1    | 1.547064699 | 0.000466596 | protein_coding |
| ENSG00000165288 | BRWD3      | 1.548170364 | 0.000313688 | protein_coding |
| ENSG00000162601 | MYSM1      | 1.548840839 | 0.000258015 | protein_coding |
| ENSG00000102780 | DGKH       | 1.548868142 | 0.00034466  | protein_coding |
| ENSG00000006459 | KDM7A      | 1.55092682  | 0.000308933 | protein_coding |
| ENSG00000117322 | CR2        | 1.551790528 | 0.003276705 | protein_coding |
| ENSG00000118412 | CASP8AP2   | 1.554386168 | 0.000291275 | protein_coding |
| ENSG00000171988 | JMJD1C     | 1.555443752 | 0.000335561 | protein_coding |
| ENSG00000137962 | ARHGAP29   | 1.55562013  | 0.000323269 | protein_coding |
| ENSG00000125107 | CNOT1      | 1.556291359 | 0.000215487 | protein_coding |
| ENSG00000170500 | LONRF2     | 1.556880596 | 0.000387151 | protein_coding |
| ENSG00000174485 | DENND4A    | 1.558440987 | 0.000332434 | protein_coding |
| ENSG00000151693 | ASAP2      | 1.559963117 | 0.000464187 | protein_coding |
| ENSG00000066933 | MYO9A      | 1.56010281  | 0.000276046 | protein_coding |
| ENSG00000115020 | PIKFYVE    | 1.561117654 | 0.000264946 | protein_coding |
| ENSG00000163590 | PPM1L      | 1.564347096 | 0.000287948 | protein_coding |
| ENSG00000104164 | BLOC1S6    | 1.566470141 | 0.000267991 | protein_coding |
| ENSG00000169860 | P2RY1      | 1.567154164 | 0.000301637 | protein_coding |
| ENSG00000123612 | ACVR1C     | 1.568105443 | 0.017143019 | protein_coding |
| ENSG00000101265 | RASSF2     | 1.568429952 | 0.000697959 | protein_coding |
| ENSG00000284906 | AC091057.6 | 1.571692592 | 0.00313105  | protein_coding |
| ENSG00000176563 | CNTD1      | 1.57677882  | 0.021096335 | protein_coding |
| ENSG00000113594 | LIFR       | 1.577345315 | 0.000247113 | protein_coding |
| ENSG00000147041 | SYTL5      | 1.577822614 | 0.000683479 | protein_coding |
| ENSG00000197077 | KIAA1671   | 1.578114965 | 0.000215822 | protein_coding |
| ENSG00000133657 | ATP13A3    | 1.582815864 | 0.000187501 | protein_coding |
| ENSG00000171385 | KCND3      | 1.584505776 | 0.012652254 | protein_coding |
| ENSG00000139116 | KIF21A     | 1.584753645 | 0.000230013 | protein_coding |
| ENSG00000169570 | DTWD2      | 1.585244496 | 0.000411463 | protein_coding |
| ENSG00000180875 | GREM2      | 1.587515822 | 0.026497687 | protein_coding |
| ENSG00000111859 | NEDD9      | 1.587515822 | 0.026497687 | protein_coding |
| ENSG00000119778 | ATAD2B     | 1.588011266 | 0.00026291  | protein_coding |
| ENSG00000075213 | SEMA3A     | 1.589108885 | 0.001514254 | protein_coding |
| ENSG00000165240 | ATP7A      | 1.589462321 | 0.000336573 | protein_coding |
| ENSG00000140993 | TIGD7      | 1.591146216 | 0.004127818 | protein_coding |
| ENSG00000204577 | LILRB3     | 1.592875369 | 0.002983684 | protein_coding |

|                 |          |             |             |                |
|-----------------|----------|-------------|-------------|----------------|
| ENSG00000136014 | USP44    | 1.593146999 | 0.000860906 | protein_coding |
| ENSG00000081026 | MAGI3    | 1.59508587  | 0.000203674 | protein_coding |
| ENSG00000073910 | FRY      | 1.595196709 | 0.000882878 | protein_coding |
| ENSG00000135837 | CEP350   | 1.595561605 | 0.000184324 | protein_coding |
| ENSG00000100605 | ITPK1    | 1.600208148 | 0.000175365 | protein_coding |
| ENSG00000069667 | RORA     | 1.60084916  | 0.000376629 | protein_coding |
| ENSG00000166736 | HTR3A    | 1.60115282  | 0.034088382 | protein_coding |
| ENSG00000070018 | LRP6     | 1.601160991 | 0.00018209  | protein_coding |
| ENSG00000172348 | RCAN2    | 1.601756527 | 0.002312478 | protein_coding |
| ENSG00000065413 | ANKRD44  | 1.601847735 | 0.000956767 | protein_coding |
| ENSG00000116675 | DNAJC6   | 1.601951112 | 0.000200597 | protein_coding |
| ENSG00000157077 | ZFYVE9   | 1.610490067 | 0.000199798 | protein_coding |
| ENSG00000128585 | MKLN1    | 1.613564807 | 0.000175186 | protein_coding |
| ENSG00000183808 | RBM12B   | 1.614344008 | 0.000175273 | protein_coding |
| ENSG00000100490 | CDKL1    | 1.617973875 | 0.001303686 | protein_coding |
| ENSG00000115423 | DNAH6    | 1.61835016  | 0.010511842 | protein_coding |
| ENSG00000140873 | ADAMTS18 | 1.619049114 | 0.045117465 | protein_coding |
| ENSG00000117281 | CD160    | 1.619049114 | 0.045117465 | protein_coding |
| ENSG00000148488 | ST8SIA6  | 1.619049114 | 0.045117465 | protein_coding |
| ENSG00000129204 | USP6     | 1.619049114 | 0.045117465 | protein_coding |
| ENSG00000148773 | MKI67    | 1.620178399 | 0.000121026 | protein_coding |
| ENSG00000261115 | TMEM178B | 1.620795311 | 0.000209648 | protein_coding |
| ENSG00000260097 | SPDYE6   | 1.622120824 | 0.006984897 | protein_coding |
| ENSG00000054654 | SYNE2    | 1.622148252 | 0.000150131 | protein_coding |
| ENSG00000206538 | VGLL3    | 1.623341956 | 0.000846283 | protein_coding |
| ENSG00000011405 | PIK3C2A  | 1.624680205 | 0.00013574  | protein_coding |
| ENSG00000176542 | USF3     | 1.628449648 | 0.000186887 | protein_coding |
| ENSG00000103489 | XYLT1    | 1.630072381 | 0.000257275 | protein_coding |
| ENSG00000088305 | DNMT3B   | 1.632640001 | 0.000138126 | protein_coding |
| ENSG00000109756 | RAPGEF2  | 1.636713555 | 0.000143959 | protein_coding |
| ENSG00000037749 | MFAP3    | 1.637047203 | 0.000177332 | protein_coding |
| ENSG00000176148 | TCP11L1  | 1.63753662  | 0.000229425 | protein_coding |
| ENSG00000109265 | KIAA1211 | 1.638705317 | 0.000242381 | protein_coding |
| ENSG00000160145 | KALRN    | 1.639049613 | 0.000711031 | protein_coding |
| ENSG00000104093 | DMXL2    | 1.64034536  | 0.000154523 | protein_coding |
| ENSG00000162989 | KCNJ3    | 1.640836162 | 0.009270117 | protein_coding |
| ENSG00000066405 | CLDN18   | 1.641699242 | 0.020623756 | protein_coding |
| ENSG00000082293 | COL19A1  | 1.641699242 | 0.020623756 | protein_coding |
| ENSG00000152402 | GUCY1A2  | 1.643077755 | 0.000881171 | protein_coding |
| ENSG00000111727 | HCFC2    | 1.643246968 | 0.00038367  | protein_coding |
| ENSG00000113396 | SLC27A6  | 1.647376498 | 0.003723589 | protein_coding |
| ENSG00000240891 | PLCXD2   | 1.648836976 | 0.000446563 | protein_coding |
| ENSG00000170542 | SERPINB9 | 1.649022868 | 0.005927856 | protein_coding |

|                 |          |             |             |                |
|-----------------|----------|-------------|-------------|----------------|
| ENSG00000137642 | SORL1    | 1.64978141  | 0.000184284 | protein_coding |
| ENSG00000092853 | CLSPN    | 1.650082848 | 0.00011775  | protein_coding |
| ENSG00000136237 | RAPGEF5  | 1.651115671 | 0.00025224  | protein_coding |
| ENSG00000164330 | EBF1     | 1.651418749 | 0.008734897 | protein_coding |
| ENSG00000109819 | PPARGC1A | 1.651418749 | 0.008734897 | protein_coding |
| ENSG00000113742 | CPEB4    | 1.651542118 | 0.000179574 | protein_coding |
| ENSG00000117500 | TMED5    | 1.654776731 | 9.78E-05    | protein_coding |
| ENSG00000188152 | NUTM2G   | 1.65575335  | 0.004091611 | protein_coding |
| ENSG00000072736 | NFATC3   | 1.655792559 | 0.000128208 | protein_coding |
| ENSG00000242689 | CNTF     | 1.659152604 | 0.006686163 | protein_coding |
| ENSG00000152818 | UTRN     | 1.659693577 | 0.000106424 | protein_coding |
| ENSG00000169314 | C22orf15 | 1.662217371 | 0.026105331 | protein_coding |
| ENSG00000180071 | ANKRD18A | 1.663548779 | 0.000394533 | protein_coding |
| ENSG00000186469 | GNG2     | 1.664419208 | 0.000639909 | protein_coding |
| ENSG00000116127 | ALMS1    | 1.674599051 | 0.000105951 | protein_coding |
| ENSG00000142396 | ERVK3-1  | 1.67649588  | 0.000334703 | protein_coding |
| ENSG00000124942 | AHNAK    | 1.677722972 | 8.13E-05    | protein_coding |
| ENSG00000065060 | UHRF1BP1 | 1.680383083 | 8.62E-05    | protein_coding |
| ENSG00000157404 | KIT      | 1.681794336 | 0.000119576 | protein_coding |
| ENSG00000120800 | UTP20    | 1.681877796 | 7.82E-05    | protein_coding |
| ENSG00000048052 | HDAC9    | 1.682145192 | 0.002565378 | protein_coding |
| ENSG00000162885 | B3GALNT2 | 1.683633572 | 0.000106381 | protein_coding |
| ENSG00000205238 | SPDYE2   | 1.683746314 | 0.007259967 | protein_coding |
| ENSG00000196912 | ANKRD36B | 1.685253921 | 0.000443499 | protein_coding |
| ENSG00000164171 | ITGA2    | 1.688662886 | 0.000199232 | protein_coding |
| ENSG00000173567 | ADGRF3   | 1.688997205 | 0.033910222 | protein_coding |
| ENSG00000133019 | CHRM3    | 1.688997205 | 0.033910222 | protein_coding |
| ENSG00000176771 | NCKAP5   | 1.689659304 | 0.003863477 | protein_coding |
| ENSG00000149256 | TENM4    | 1.693340472 | 0.000180889 | protein_coding |
| ENSG00000178033 | CALHM5   | 1.693921139 | 0.016051556 | protein_coding |
| ENSG00000174501 | ANKRD36C | 1.695887206 | 0.0003108   | protein_coding |
| ENSG00000152377 | SPOCK1   | 1.69689086  | 0.008764824 | protein_coding |
| ENSG00000112159 | MDN1     | 1.698847211 | 5.99E-05    | protein_coding |
| ENSG00000184588 | PDE4B    | 1.698877121 | 0.008356463 | protein_coding |
| ENSG00000150893 | FREM2    | 1.703059914 | 0.000135322 | protein_coding |
| ENSG00000114541 | FRMD4B   | 1.70414796  | 0.000255176 | protein_coding |
| ENSG00000172733 | PURG     | 1.704867089 | 0.000826852 | protein_coding |
| ENSG00000140836 | ZFHX3    | 1.706499866 | 0.00011899  | protein_coding |
| ENSG00000145675 | PIK3R1   | 1.708158629 | 0.000101321 | protein_coding |
| ENSG00000066279 | ASPM     | 1.714529846 | 5.26E-05    | protein_coding |
| ENSG00000108021 | FAM208B  | 1.7165249   | 5.10E-05    | protein_coding |
| ENSG00000158427 | TMSB15B  | 1.718197502 | 0.010384446 | protein_coding |
| ENSG00000137393 | RNF144B  | 1.721995339 | 0.001490418 | protein_coding |

|                 |           |             |             |                |
|-----------------|-----------|-------------|-------------|----------------|
| ENSG00000150627 | WDR17     | 1.722449857 | 0.000119358 | protein_coding |
| ENSG00000153707 | PTPRD     | 1.725045925 | 8.52E-05    | protein_coding |
| ENSG00000136040 | PLXNC1    | 1.728552161 | 0.001127459 | protein_coding |
| ENSG00000145734 | BDP1      | 1.730600264 | 5.09E-05    | protein_coding |
| ENSG00000180263 | FGD6      | 1.730736588 | 0.000136106 | protein_coding |
| ENSG00000162849 | KIF26B    | 1.734513932 | 0.000286059 | protein_coding |
| ENSG00000164187 | LMBRD2    | 1.736457661 | 0.00010159  | protein_coding |
| ENSG00000197969 | VPS13A    | 1.737418406 | 4.57E-05    | protein_coding |
| ENSG00000197312 | DDI2      | 1.738304609 | 4.58E-05    | protein_coding |
| ENSG00000104517 | UBR5      | 1.742879689 | 4.03E-05    | protein_coding |
| ENSG00000156675 | RAB11FIP1 | 1.744321703 | 5.44E-05    | protein_coding |
| ENSG00000141367 | CLTC      | 1.745486264 | 3.70E-05    | protein_coding |
| ENSG00000187801 | ZFP69B    | 1.747700817 | 0.001240795 | protein_coding |
| ENSG00000166446 | CDYL2     | 1.750101932 | 0.000159047 | protein_coding |
| ENSG00000131711 | MAP1B     | 1.750780864 | 4.59E-05    | protein_coding |
| ENSG00000138688 | KIAA1109  | 1.755052342 | 5.93E-05    | protein_coding |
| ENSG00000136197 | C7orf25   | 1.755710159 | 0.025475297 | protein_coding |
| ENSG00000087494 | PTHLH     | 1.755710159 | 0.025475297 | protein_coding |
| ENSG00000121101 | TEX14     | 1.755710159 | 0.025475297 | protein_coding |
| ENSG00000180530 | NRIP1     | 1.756846255 | 6.88E-05    | protein_coding |
| ENSG00000038295 | TLL1      | 1.762415722 | 0.008204261 | protein_coding |
| ENSG00000081479 | LRP2      | 1.762987354 | 5.20E-05    | protein_coding |
| ENSG00000110344 | UBE4A     | 1.777797759 | 3.83E-05    | protein_coding |
| ENSG00000130783 | CCDC62    | 1.777899623 | 0.045202178 | protein_coding |
| ENSG00000176928 | GCNT4     | 1.777899623 | 0.045202178 | protein_coding |
| ENSG00000203814 | HIST2H2BF | 1.777899623 | 0.045202178 | protein_coding |
| ENSG00000137261 | KIAA0319  | 1.777899623 | 0.045202178 | protein_coding |
| ENSG00000188064 | WNT7B     | 1.777899623 | 0.045202178 | protein_coding |
| ENSG00000145794 | MEGF10    | 1.785809915 | 0.00374952  | protein_coding |
| ENSG00000198780 | FAM169A   | 1.789625708 | 6.15E-05    | protein_coding |
| ENSG00000261150 | EPPK1     | 1.791082152 | 0.000306115 | protein_coding |
| ENSG00000119547 | ONECUT2   | 1.792830264 | 3.25E-05    | protein_coding |
| ENSG00000168769 | TET2      | 1.796930299 | 4.59E-05    | protein_coding |
| ENSG00000070669 | ASNS      | 1.797253478 | 0.000251613 | protein_coding |
| ENSG00000057468 | MSH4      | 1.802890026 | 0.033376343 | protein_coding |
| ENSG00000119121 | TRPM6     | 1.802890026 | 0.033376343 | protein_coding |
| ENSG00000064309 | CDON      | 1.803896811 | 3.54E-05    | protein_coding |
| ENSG00000156011 | PSD3      | 1.803928892 | 3.40E-05    | protein_coding |
| ENSG00000074410 | CA12      | 1.813447702 | 4.82E-05    | protein_coding |
| ENSG00000162490 | DRAXIN    | 1.819474048 | 0.019137366 | protein_coding |
| ENSG00000103534 | TMC5      | 1.819474048 | 0.019137366 | protein_coding |
| ENSG00000230453 | ANKRD18B  | 1.820314568 | 9.13E-05    | protein_coding |
| ENSG00000134532 | SOX5      | 1.821627016 | 0.000256125 | protein_coding |

|                 |            |             |             |                |
|-----------------|------------|-------------|-------------|----------------|
| ENSG00000123104 | ITPR2      | 1.826962631 | 2.84E-05    | protein_coding |
| ENSG00000138119 | MYOF       | 1.829736683 | 0.003870034 | protein_coding |
| ENSG00000113810 | SMC4       | 1.830974398 | 1.66E-05    | protein_coding |
| ENSG00000156218 | ADAMTSL3   | 1.835336115 | 0.003476403 | protein_coding |
| ENSG00000177483 | RBM44      | 1.8401208   | 0.007582043 | protein_coding |
| ENSG00000258881 | AC007040.2 | 1.840125196 | 0.002638872 | protein_coding |
| ENSG00000173517 | PEAK1      | 1.845405353 | 1.92E-05    | protein_coding |
| ENSG00000139209 | SLC38A4    | 1.84698292  | 0.00512978  | protein_coding |
| ENSG00000140937 | CDH11      | 1.847887059 | 0.001614421 | protein_coding |
| ENSG00000176244 | ACBD7      | 1.852558997 | 0.000433815 | protein_coding |
| ENSG00000107249 | GLIS3      | 1.864339988 | 0.000511591 | protein_coding |
| ENSG00000253729 | PRKDC      | 1.865211579 | 1.09E-05    | protein_coding |
| ENSG00000119285 | HEATR1     | 1.865747931 | 1.14E-05    | protein_coding |
| ENSG00000204524 | ZNF805     | 1.868660561 | 0.000338464 | protein_coding |
| ENSG00000284862 | CCDC39     | 1.870238424 | 0.032292239 | protein_coding |
| ENSG00000090339 | ICAM1      | 1.870238424 | 0.032292239 | protein_coding |
| ENSG00000182400 | TRAPPC6B   | 1.873204296 | 0.000121634 | protein_coding |
| ENSG00000151835 | SACS       | 1.875909836 | 1.19E-05    | protein_coding |
| ENSG00000188158 | NHS        | 1.876694399 | 8.97E-05    | protein_coding |
| ENSG00000005810 | MYCBP2     | 1.8770259   | 1.05E-05    | protein_coding |
| ENSG00000113522 | RAD50      | 1.877836135 | 0.000147997 | protein_coding |
| ENSG00000119737 | GPR75      | 1.879289672 | 0.000524355 | protein_coding |
| ENSG00000145826 | LECT2      | 1.880538599 | 0.014380224 | protein_coding |
| ENSG00000127329 | PTPRB      | 1.883505264 | 0.00898543  | protein_coding |
| ENSG00000171724 | VAT1L      | 1.883505264 | 0.00898543  | protein_coding |
| ENSG00000196660 | SLC30A10   | 1.890015129 | 0.002125384 | protein_coding |
| ENSG00000103888 | CEMIP      | 1.89096877  | 0.002641227 | protein_coding |
| ENSG00000165323 | FAT3       | 1.903268712 | 1.92E-05    | protein_coding |
| ENSG00000177200 | CHD9       | 1.905022104 | 1.17E-05    | protein_coding |
| ENSG00000173166 | RAPH1      | 1.909250224 | 0.000174393 | protein_coding |
| ENSG00000145242 | EPHA5      | 1.911578956 | 0.000351831 | protein_coding |
| ENSG00000182901 | RGS7       | 1.924382764 | 0.002322339 | protein_coding |
| ENSG00000143341 | HMCN1      | 1.930744995 | 0.000481604 | protein_coding |
| ENSG00000107890 | ANKRD26    | 1.94048301  | 1.98E-05    | protein_coding |
| ENSG00000182389 | CACNB4     | 1.944851693 | 1.32E-05    | protein_coding |
| ENSG00000242265 | PEG10      | 1.946351172 | 0.018003167 | protein_coding |
| ENSG00000097096 | SYDE2      | 1.948220768 | 1.81E-05    | protein_coding |
| ENSG00000198963 | RORB       | 1.952670797 | 7.86E-05    | protein_coding |
| ENSG00000165813 | CCDC186    | 1.959398793 | 1.18E-05    | protein_coding |
| ENSG00000198729 | PPP1R14C   | 1.962666637 | 9.20E-06    | protein_coding |
| ENSG00000156869 | FRRS1      | 1.96556378  | 6.07E-05    | protein_coding |
| ENSG00000146858 | ZC3HAV1L   | 1.966993866 | 9.73E-06    | protein_coding |
| ENSG00000241484 | ARHGAP8    | 1.968682577 | 6.30E-05    | protein_coding |



|                 |            |             |             |                |
|-----------------|------------|-------------|-------------|----------------|
| ENSG00000000005 | TNMD       | 1.972858635 | 0.00360343  | protein_coding |
| ENSG00000001626 | CFTR       | 1.974359603 | 0.043991311 | protein_coding |
| ENSG00000073464 | CLCN4      | 1.974359603 | 0.043991311 | protein_coding |
| ENSG00000206384 | COL6A6     | 1.974359603 | 0.043991311 | protein_coding |
| ENSG00000173258 | ZNF483     | 1.987027818 | 0.000189959 | protein_coding |
| ENSG00000160401 | CFAP157    | 1.997639638 | 0.000150461 | protein_coding |
| ENSG00000177076 | ACER2      | 2.006147899 | 0.001496038 | protein_coding |
| ENSG00000196159 | FAT4       | 2.013227867 | 1.48E-05    | protein_coding |
| ENSG00000133863 | TEX15      | 2.014496886 | 4.10E-06    | protein_coding |
| ENSG00000185477 | GPRIN3     | 2.016214427 | 5.15E-06    | protein_coding |
| ENSG00000131016 | AKAP12     | 2.019819803 | 2.52E-06    | protein_coding |
| ENSG00000188848 | BEND4      | 2.021710131 | 5.70E-06    | protein_coding |
| ENSG00000255423 | EBLN2      | 2.023913006 | 0.000977512 | protein_coding |
| ENSG00000166004 | CEP295     | 2.024453143 | 5.88E-06    | protein_coding |
| ENSG00000155629 | PIK3AP1    | 2.043914303 | 3.38E-05    | protein_coding |
| ENSG00000189184 | PCDH18     | 2.052036269 | 3.13E-05    | protein_coding |
| ENSG00000182986 | ZNF320     | 2.055017197 | 0.002205393 | protein_coding |
| ENSG00000112379 | ARFGEF3    | 2.066732585 | 5.54E-06    | protein_coding |
| ENSG00000157106 | SMG1       | 2.069643947 | 1.38E-06    | protein_coding |
| ENSG00000020577 | SAMD4A     | 2.070436178 | 3.66E-06    | protein_coding |
| ENSG00000134317 | GRHL1      | 2.076376212 | 2.92E-05    | protein_coding |
| ENSG00000099260 | PALMD      | 2.076828015 | 0.009732694 | protein_coding |
| ENSG00000163377 | FAM19A4    | 2.080259875 | 0.030348148 | protein_coding |
| ENSG00000198146 | ZNF770     | 2.09297018  | 1.66E-06    | protein_coding |
| ENSG00000004799 | PDK4       | 2.101826493 | 0.004621058 | protein_coding |
| ENSG00000102908 | NFAT5      | 2.10674693  | 1.58E-06    | protein_coding |
| ENSG00000165194 | PCDH19     | 2.110641212 | 1.02E-05    | protein_coding |
| ENSG00000166126 | AMN        | 2.116339181 | 0.016492881 | protein_coding |
| ENSG00000137571 | SLCO5A1    | 2.118142393 | 1.53E-05    | protein_coding |
| ENSG00000138769 | CDKL2      | 2.130372933 | 0.000890608 | protein_coding |
| ENSG00000169432 | SCN9A      | 2.138437934 | 3.68E-05    | protein_coding |
| ENSG00000172292 | CERS6      | 2.138760603 | 1.19E-06    | protein_coding |
| ENSG00000180801 | ARSJ       | 2.14666337  | 6.76E-05    | protein_coding |
| ENSG00000267216 | AC020915.1 | 2.176045253 | 0.00064876  | protein_coding |
| ENSG00000234284 | ZNF879     | 2.178477119 | 0.00013211  | protein_coding |
| ENSG00000148204 | CRB2       | 2.178915363 | 0.020952111 | protein_coding |
| ENSG00000028137 | TNFRSF1B   | 2.178915363 | 0.020952111 | protein_coding |
| ENSG00000133124 | IRS4       | 2.18959203  | 3.34E-07    | protein_coding |
| ENSG00000106278 | PTPRZ1     | 2.189852236 | 0.011803031 | protein_coding |
| ENSG00000111913 | RIPOR2     | 2.189852236 | 0.011803031 | protein_coding |
| ENSG00000115464 | USP34      | 2.190390421 | 4.43E-07    | protein_coding |
| ENSG00000115232 | ITGA4      | 2.190633679 | 1.41E-06    | protein_coding |
| ENSG00000112137 | PHACTR1    | 2.193012989 | 0.000204205 | protein_coding |

|                 |            |             |             |                |
|-----------------|------------|-------------|-------------|----------------|
| ENSG00000120500 | ARR3       | 2.196477074 | 0.005286278 | protein_coding |
| ENSG00000169856 | ONECUT1    | 2.196477074 | 0.005286278 | protein_coding |
| ENSG00000169403 | PTAFR      | 2.196477074 | 0.005286278 | protein_coding |
| ENSG00000159905 | ZNF221     | 2.204106808 | 0.001436097 | protein_coding |
| ENSG00000046889 | PREX2      | 2.215859245 | 2.61E-06    | protein_coding |
| ENSG00000151012 | SLC7A11    | 2.218139691 | 4.49E-07    | protein_coding |
| ENSG00000173678 | SPDYE2B    | 2.248026154 | 0.001998931 | protein_coding |
| ENSG00000189195 | BTBD8      | 2.266310999 | 0.000273264 | protein_coding |
| ENSG00000023445 | BIRC3      | 2.271254164 | 0.014485426 | protein_coding |
| ENSG00000186047 | DLEU7      | 2.271254164 | 0.014485426 | protein_coding |
| ENSG00000179331 | RAB39A     | 2.283506676 | 3.36E-06    | protein_coding |
| ENSG00000132561 | MATN2      | 2.283990175 | 0.000860935 | protein_coding |
| ENSG00000164142 | FAM160A1   | 2.285009301 | 3.62E-06    | protein_coding |
| ENSG00000165376 | CLDN2      | 2.293253063 | 0.041032031 | protein_coding |
| ENSG00000255154 | HTD2       | 2.293253063 | 0.041032031 | protein_coding |
| ENSG00000142512 | SIGLEC10   | 2.293253063 | 0.041032031 | protein_coding |
| ENSG00000110436 | SLC1A2     | 2.293253063 | 0.041032031 | protein_coding |
| ENSG00000183638 | RP1L1      | 2.293642619 | 0.001516645 | protein_coding |
| ENSG00000197837 | HIST4H4    | 2.306958564 | 0.00288962  | protein_coding |
| ENSG00000188167 | TMPPE      | 2.318718056 | 2.18E-05    | protein_coding |
| ENSG00000197779 | ZNF81      | 2.324104073 | 5.78E-07    | protein_coding |
| ENSG00000152580 | IGSF10     | 2.326513282 | 0.006072876 | protein_coding |
| ENSG00000092969 | TGFB2      | 2.326513282 | 0.006072876 | protein_coding |
| ENSG00000139973 | SYT16      | 2.34502156  | 2.80E-05    | protein_coding |
| ENSG00000146414 | SHPRH      | 2.35299151  | 1.08E-07    | protein_coding |
| ENSG00000179902 | C1orf194   | 2.358036719 | 0.010033723 | protein_coding |
| ENSG00000131730 | CKMT2      | 2.359681431 | 0.000519431 | protein_coding |
| ENSG00000188033 | ZNF490     | 2.359681431 | 0.000519431 | protein_coding |
| ENSG00000144893 | MED12L     | 2.374339114 | 7.67E-07    | protein_coding |
| ENSG00000233757 | AC092835.1 | 2.396088153 | 0.000404469 | protein_coding |
| ENSG00000149970 | CNKS2      | 2.417386885 | 0.02704271  | protein_coding |
| ENSG00000204882 | GPR20      | 2.417386885 | 0.02704271  | protein_coding |
| ENSG00000164532 | TBX20      | 2.431848671 | 1.69E-05    | protein_coding |
| ENSG00000109906 | ZBTB16     | 2.434070994 | 5.74E-05    | protein_coding |
| ENSG00000280987 | MATR3      | 2.439893911 | 0.010033723 | protein_coding |
| ENSG00000106125 | MINDY4     | 2.439893911 | 0.010033723 | protein_coding |
| ENSG00000104321 | TRPA1      | 2.439893911 | 0.010033723 | protein_coding |
| ENSG00000135913 | USP37      | 2.450374023 | 7.17E-08    | protein_coding |
| ENSG00000008311 | AASS       | 2.450469332 | 9.42E-08    | protein_coding |
| ENSG00000171189 | GRIK1      | 2.451341722 | 0.003149424 | protein_coding |
| ENSG00000033122 | LRRC7      | 2.451585365 | 7.64E-05    | protein_coding |
| ENSG00000100852 | ARHGAP5    | 2.485741296 | 2.43E-08    | protein_coding |
| ENSG00000140009 | ESR2       | 2.495221266 | 5.31E-05    | protein_coding |

|                 |                  |             |             |                |
|-----------------|------------------|-------------|-------------|----------------|
| ENSG00000166439 | RNF169           | 2.496854103 | 2.59E-08    | protein_coding |
| ENSG00000163635 | ATXN7            | 2.505380121 | 0.000883969 | protein_coding |
| ENSG00000174130 | TLR6             | 2.509926229 | 0.002275868 | protein_coding |
| ENSG00000182108 | DEXI             | 2.515317833 | 7.76E-07    | protein_coding |
| ENSG00000053328 | METTL24          | 2.51735492  | 0.006966163 | protein_coding |
| ENSG00000160229 | ZNF66            | 2.531680917 | 0.017862218 | protein_coding |
| ENSG00000197714 | ZNF460           | 2.53640587  | 6.32E-06    | protein_coding |
| ENSG00000133816 | MICAL2           | 2.542918878 | 2.45E-07    | protein_coding |
| ENSG00000172575 | RASGRP1          | 2.549679762 | 2.08E-06    | protein_coding |
| ENSG00000135436 | FAM186B          | 2.566224299 | 0.001648699 | protein_coding |
| ENSG00000249931 | GOLGA8K          | 2.566224299 | 0.001648699 | protein_coding |
| ENSG00000185900 | POMK             | 2.575406271 | 5.31E-08    | protein_coding |
| ENSG00000137801 | THBS1            | 2.590867976 | 0.004849114 | protein_coding |
| ENSG00000198785 | GRIN3A           | 2.620407719 | 0.001197455 | protein_coding |
| ENSG00000218305 | CDC14C           | 2.637581188 | 0.011832427 | protein_coding |
| ENSG00000157999 | ANKRD61          | 2.64991994  | 0.000137515 | protein_coding |
| ENSG00000122420 | PTGFR            | 2.660816067 | 0.003385132 | protein_coding |
| ENSG00000261732 | AL031708.1       | 2.727529021 | 0.002370371 | protein_coding |
| ENSG00000155011 | DKK2             | 2.736236676 | 0.007864773 | protein_coding |
| ENSG00000151322 | NPAS3            | 2.736236676 | 0.007864773 | protein_coding |
| ENSG00000248405 | PRR5-<br>ARHGAP8 | 2.736236676 | 0.007864773 | protein_coding |
| ENSG00000144426 | NBEAL1           | 2.75269007  | 5.06E-08    | protein_coding |
| ENSG00000137959 | IFI44L           | 2.771723241 | 0.000466301 | protein_coding |
| ENSG00000188211 | NCR3LG1          | 2.789086287 | 4.75E-10    | protein_coding |
| ENSG00000168454 | TXNDC2           | 2.79129291  | 0.001665133 | protein_coding |
| ENSG00000080200 | CRYBG3           | 2.810448053 | 7.49E-10    | protein_coding |
| ENSG00000175556 | LONRF3           | 2.827566775 | 1.97E-09    | protein_coding |
| ENSG00000187987 | ZSCAN23          | 2.864752801 | 2.96E-06    | protein_coding |
| ENSG00000134042 | MRO              | 2.910941968 | 0.000829981 | protein_coding |
| ENSG00000136206 | SPDYE1           | 2.915358032 | 0.003515158 | protein_coding |
| ENSG00000283208 | AC001226.2       | 2.927583998 | 0.034866602 | protein_coding |
| ENSG00000175820 | CCDC168          | 2.927583998 | 0.034866602 | protein_coding |
| ENSG00000176153 | GPX2             | 2.927583998 | 0.034866602 | protein_coding |
| ENSG00000148082 | SHC3             | 2.927583998 | 0.034866602 | protein_coding |
| ENSG00000162753 | SLC9C2           | 2.927583998 | 0.034866602 | protein_coding |
| ENSG00000177301 | KCNA2            | 2.930698097 | 7.50E-06    | protein_coding |
| ENSG00000205413 | SAMD9            | 2.967240038 | 0.000589    | protein_coding |
| ENSG00000151967 | SCHIP1           | 2.993231159 | 0.000102431 | protein_coding |
| ENSG00000133107 | TRPC4            | 2.997215225 | 0.003515158 | protein_coding |
| ENSG00000185666 | SYN3             | 3.008844338 | 2.42E-05    | protein_coding |
| ENSG00000165521 | EML5             | 3.020040061 | 7.50E-10    | protein_coding |
| ENSG00000041353 | RAB27B           | 3.073645355 | 0.000299755 | protein_coding |

|                 |                 |             |             |                |
|-----------------|-----------------|-------------|-------------|----------------|
| ENSG00000129048 | ACKR4           | 3.074676234 | 0.002364823 | protein_coding |
| ENSG00000169435 | RASSF6          | 3.074676234 | 0.002364823 | protein_coding |
| ENSG00000165972 | CCDC38          | 3.077542886 | 0.021566548 | protein_coding |
| ENSG00000172404 | DNAJB7          | 3.077542886 | 0.021566548 | protein_coding |
| ENSG00000182732 | RGS6            | 3.077542886 | 0.021566548 | protein_coding |
| ENSG00000112212 | TSPO2           | 3.077542886 | 0.021566548 | protein_coding |
| ENSG00000178502 | KLHL11          | 3.180205542 | 1.51E-10    | protein_coding |
| ENSG00000283761 | AC118553.2      | 3.21337172  | 0.013412089 | protein_coding |
| ENSG00000167601 | AXL             | 3.21337172  | 0.013412089 | protein_coding |
| ENSG00000165168 | CYBB            | 3.21337172  | 0.013412089 | protein_coding |
| ENSG00000122735 | DNAI1           | 3.21337172  | 0.013412089 | protein_coding |
| ENSG00000184599 | FAM19A3         | 3.21337172  | 0.013412089 | protein_coding |
| ENSG00000182329 | KIAA2012        | 3.21337172  | 0.013412089 | protein_coding |
| ENSG00000262180 | OCLM            | 3.21337172  | 0.013412089 | protein_coding |
| ENSG00000114757 | PEX5L           | 3.21337172  | 0.013412089 | protein_coding |
| ENSG00000158683 | PKD1L1          | 3.21337172  | 0.013412089 | protein_coding |
| ENSG00000165646 | SLC18A2         | 3.21337172  | 0.013412089 | protein_coding |
| ENSG00000259224 | SLC35G6         | 3.21337172  | 0.013412089 | protein_coding |
| ENSG00000105989 | WNT2            | 3.21337172  | 0.013412089 | protein_coding |
| ENSG00000131379 | C3orf20         | 3.218137381 | 0.001084588 | protein_coding |
| ENSG00000173157 | ADAMTS20        | 3.308352831 | 9.30E-08    | protein_coding |
| ENSG00000265107 | GJA5            | 3.337505542 | 0.008390282 | protein_coding |
| ENSG00000188921 | HACD4           | 3.337505542 | 0.008390282 | protein_coding |
| ENSG00000174145 | NWD2            | 3.337505542 | 0.008390282 | protein_coding |
| ENSG00000101349 | PAK5            | 3.337505542 | 0.008390282 | protein_coding |
| ENSG00000162924 | REL             | 3.345425804 | 8.37E-12    | protein_coding |
| ENSG00000171217 | CLDN20          | 3.451799574 | 0.005281544 | protein_coding |
| ENSG00000204767 | INSYN2B         | 3.451799574 | 0.005281544 | protein_coding |
| ENSG00000166800 | LDHAL6A         | 3.451799574 | 0.005281544 | protein_coding |
| ENSG00000080854 | IGSF9B          | 3.490554174 | 4.86E-11    | protein_coding |
| ENSG00000281106 | TMEM272         | 3.524561352 | 0.000167283 | protein_coding |
| ENSG00000196811 | CHRNA7          | 3.557699845 | 0.003346055 | protein_coding |
| ENSG00000108950 | FAM20A          | 3.557699845 | 0.003346055 | protein_coding |
| ENSG00000164197 | RNF180          | 3.656355333 | 0.002133716 | protein_coding |
| ENSG00000104728 | ARHGAP10        | 3.656396259 | 3.89E-06    | protein_coding |
| ENSG00000157654 | PALM2-<br>AKAP2 | 3.748694134 | 0.001369576 | protein_coding |
| ENSG00000187243 | MAGED4B         | 3.758713601 | 1.10E-11    | protein_coding |
| ENSG00000132357 | CARD6           | 3.818196698 | 9.57E-07    | protein_coding |
| ENSG00000166960 | CCDC178         | 3.83547669  | 0.000884859 | protein_coding |
| ENSG00000103184 | SEC14L5         | 3.83547669  | 0.000884859 | protein_coding |
| ENSG00000243444 | PALM2           | 3.994794891 | 0.000575412 | protein_coding |
| ENSG00000267710 | EDDM13          | 4.204968992 | 0.000164371 | protein_coding |

|                 |            |             |             |                |
|-----------------|------------|-------------|-------------|----------------|
| ENSG00000188107 | EYS        | 4.204968992 | 0.000164371 | protein_coding |
| ENSG00000197410 | DCHS2      | 4.329797432 | 7.35E-05    | protein_coding |
| ENSG00000261247 | GOLGA8T    | 4.650178951 | 7.53E-06    | protein_coding |
| ENSG00000173208 | ABCD2      | 5.567319661 | 0.040964585 | protein_coding |
| ENSG00000281593 | AC006978.2 | 5.567319661 | 0.040964585 | protein_coding |
| ENSG00000273291 | AC092042.3 | 5.567319661 | 0.040964585 | protein_coding |
| ENSG00000258466 | AL049779.1 | 5.567319661 | 0.040964585 | protein_coding |
| ENSG00000164122 | ASB5       | 5.567319661 | 0.040964585 | protein_coding |
| ENSG00000152430 | BOLL       | 5.567319661 | 0.040964585 | protein_coding |
| ENSG00000181215 | C4orf50    | 5.567319661 | 0.040964585 | protein_coding |
| ENSG00000123500 | COL10A1    | 5.567319661 | 0.040964585 | protein_coding |
| ENSG00000124875 | CXCL6      | 5.567319661 | 0.040964585 | protein_coding |
| ENSG00000173198 | CYSLTR1    | 5.567319661 | 0.040964585 | protein_coding |
| ENSG00000124721 | DNAH8      | 5.567319661 | 0.040964585 | protein_coding |
| ENSG00000170074 | FAM153A    | 5.567319661 | 0.040964585 | protein_coding |
| ENSG00000164125 | FAM198B    | 5.567319661 | 0.040964585 | protein_coding |
| ENSG00000115474 | KCNJ13     | 5.567319661 | 0.040964585 | protein_coding |
| ENSG00000184261 | KCNK12     | 5.567319661 | 0.040964585 | protein_coding |
| ENSG00000226650 | KIF4B      | 5.567319661 | 0.040964585 | protein_coding |
| ENSG00000101977 | MCF2       | 5.567319661 | 0.040964585 | protein_coding |
| ENSG00000162992 | NEUROD1    | 5.567319661 | 0.040964585 | protein_coding |
| ENSG00000132915 | PDE6A      | 5.567319661 | 0.040964585 | protein_coding |
| ENSG00000095303 | PTGS1      | 5.567319661 | 0.040964585 | protein_coding |
| ENSG00000188050 | RNF133     | 5.567319661 | 0.040964585 | protein_coding |
| ENSG00000106327 | TFR2       | 5.567319661 | 0.040964585 | protein_coding |
| ENSG00000234224 | TMEM229A   | 5.567319661 | 0.040964585 | protein_coding |
| ENSG00000049249 | TNFRSF9    | 5.567319661 | 0.040964585 | protein_coding |
| ENSG00000106927 | AMBP       | 5.785358955 | 0.022676824 | protein_coding |
| ENSG00000091879 | ANGPT2     | 5.785358955 | 0.022676824 | protein_coding |
| ENSG00000164287 | CDC20B     | 5.785358955 | 0.022676824 | protein_coding |
| ENSG00000104432 | IL7        | 5.785358955 | 0.022676824 | protein_coding |
| ENSG00000184361 | SPATA32    | 5.785358955 | 0.022676824 | protein_coding |
| ENSG00000116194 | ANGPTL1    | 5.974730546 | 0.012730848 | protein_coding |
| ENSG00000232196 | MTRNR2L4   | 5.974730546 | 0.012730848 | protein_coding |
| ENSG00000154645 | CHODL      | 6.142104357 | 0.007243414 | protein_coding |
| ENSG00000143226 | FCGR2A     | 6.142104357 | 0.007243414 | protein_coding |
| ENSG00000153253 | SCN3A      | 6.142104357 | 0.007243414 | protein_coding |
| ENSG00000182584 | ACTL10     | 6.292063245 | 0.004174171 | protein_coding |
| ENSG00000124701 | APOBEC2    | 6.292063245 | 0.004174171 | protein_coding |
| ENSG00000205882 | DEFB134    | 6.292063245 | 0.004174171 | protein_coding |
| ENSG00000263874 | LINC00672  | 6.292063245 | 0.004174171 | protein_coding |
| ENSG00000115956 | PLEK       | 6.292063245 | 0.004174171 | protein_coding |
| ENSG00000151062 | CACNA2D4   | 6.42789208  | 0.002434933 | protein_coding |

|                 |           |             |             |                |
|-----------------|-----------|-------------|-------------|----------------|
| ENSG00000135960 | EDAR      | 6.42789208  | 0.002434933 | protein_coding |
| ENSG00000019991 | HGF       | 6.42789208  | 0.002434933 | protein_coding |
| ENSG00000056291 | NPFFR2    | 6.42789208  | 0.002434933 | protein_coding |
| ENSG00000102359 | SRPX2     | 6.42789208  | 0.002434933 | protein_coding |
| ENSG00000276203 | ANKRD20A3 | 6.552025902 | 0.00143701  | protein_coding |
| ENSG00000127362 | TAS2R3    | 6.552025902 | 0.00143701  | protein_coding |
| ENSG00000257315 | ZBED6     | 6.552025902 | 0.00143701  | protein_coding |
| ENSG00000138379 | MSTN      | 6.666319933 | 0.00085757  | protein_coding |
| ENSG00000113494 | PRLR      | 6.666319933 | 0.00085757  | protein_coding |
| ENSG00000055813 | CCDC85A   | 6.772220205 | 0.000517265 | protein_coding |
| ENSG00000204323 | SMIM5     | 6.870875693 | 0.000315208 | protein_coding |
| ENSG00000242950 | ERVW-1    | 6.963214494 | 0.000193974 | protein_coding |
| ENSG00000120215 | MLANA     | 7.765605685 | 1.61E-06    | protein_coding |

| Genes differentially expressed in shBLM cells (p<0.05; log2FoldChang>1) |              |                |             |                |
|-------------------------------------------------------------------------|--------------|----------------|-------------|----------------|
| Gene_id                                                                 | Gene_name    | log2FoldChange | P value     | Gene_biotype   |
| ENSG00000162032                                                         | SPSB3        | -7.339690146   | 3.05E-05    | protein_coding |
| ENSG00000130489                                                         | SCO2         | -7.188676326   | 7.55E-05    | protein_coding |
| ENSG00000175832                                                         | ETV4         | -7.019986963   | 0.000193974 | protein_coding |
| ENSG00000132518                                                         | GUCY2D       | -6.72298963    | 0.00085757  | protein_coding |
| ENSG00000254585                                                         | MAGEL2       | -6.72298963    | 0.00085757  | protein_coding |
| ENSG00000100060                                                         | MFNG         | -6.608650041   | 0.00143701  | protein_coding |
| ENSG00000273154                                                         | AL121845.3   | -6.484462474   | 0.002434933 | protein_coding |
| ENSG00000171847                                                         | FAM90A1      | -6.484462474   | 0.002434933 | protein_coding |
| ENSG00000164855                                                         | TMEM184A     | -6.484462474   | 0.002434933 | protein_coding |
| ENSG00000261408                                                         | TEN1-CDK3    | -6.348569279   | 0.004174171 | protein_coding |
| ENSG00000169744                                                         | LDB2         | -6.198531926   | 0.007243414 | protein_coding |
| ENSG00000259305                                                         | ZHX1-C8orf76 | -6.198531926   | 0.007243414 | protein_coding |
| ENSG00000224712                                                         | NPIPA3       | -6.198531926   | 0.007243414 | protein_coding |
| ENSG00000102452                                                         | NALCN        | -6.198531926   | 0.007243414 | protein_coding |
| ENSG00000132274                                                         | TRIM22       | -6.198531926   | 0.007243414 | protein_coding |
| ENSG00000006047                                                         | YBX2         | -6.031060341   | 0.012730848 | protein_coding |
| ENSG00000114547                                                         | ROPN1B       | -6.031060341   | 0.012730848 | protein_coding |
| ENSG00000198844                                                         | ARHGEF15     | -6.031060341   | 0.012730848 | protein_coding |
| ENSG00000010704                                                         | HFE          | -5.841563537   | 0.022676824 | protein_coding |
| ENSG00000169181                                                         | GSG1L        | -5.841563537   | 0.022676824 | protein_coding |
| ENSG00000158816                                                         | VWA5B1       | -5.841563537   | 0.022676824 | protein_coding |
| ENSG00000109758                                                         | HGFAC        | -5.623358155   | 0.040964585 | protein_coding |
| ENSG00000132026                                                         | RTBDN        | -5.623358155   | 0.040964585 | protein_coding |
| ENSG00000182584                                                         | ACTL10       | -5.623358155   | 0.040964585 | protein_coding |
| ENSG00000112245                                                         | PTP4A1       | -5.623358155   | 0.040964585 | protein_coding |
| ENSG00000100985                                                         | MMP9         | -5.623358155   | 0.040964585 | protein_coding |
| ENSG00000197479                                                         | PCDHB11      | -5.623358155   | 0.040964585 | protein_coding |
| ENSG00000102931                                                         | ARL2BP       | -5.304971107   | 5.77E-15    | protein_coding |
| ENSG00000154545                                                         | MAGED4       | -4.431882214   | 1.32E-16    | protein_coding |
| ENSG00000188263                                                         | IL17REL      | -4.314255447   | 0.000109596 | protein_coding |
| ENSG00000183153                                                         | GJD3         | -4.177561833   | 0.000248027 | protein_coding |
| ENSG00000159884                                                         | CCDC107      | -3.900509294   | 7.18E-10    | protein_coding |
| ENSG00000125533                                                         | BHLHE23      | -3.765490121   | 0.002133716 | protein_coding |
| ENSG00000166920                                                         | C15orf48     | -3.765490121   | 0.002133716 | protein_coding |
| ENSG00000128645                                                         | HOXD1        | -3.666800696   | 0.003346055 | protein_coding |
| ENSG00000258674                                                         | AC011448.1   | -3.626030568   | 9.35E-06    | protein_coding |
| ENSG00000127774                                                         | EMC6         | -3.616919864   | 2.49E-07    | protein_coding |
| ENSG00000185105                                                         | MYADML2      | -3.560861317   | 0.005281544 | protein_coding |
| ENSG00000241697                                                         | TMEFF1       | -3.472256066   | 8.61E-08    | protein_coding |

|                 |             |              |             |                |
|-----------------|-------------|--------------|-------------|----------------|
| ENSG00000171450 | CDK5R2      | -3.460955611 | 0.000348534 | protein_coding |
| ENSG00000167476 | JSRP1       | -3.446521728 | 0.008390282 | protein_coding |
| ENSG00000278558 | TMEM191B    | -3.41803842  | 1.56E-06    | protein_coding |
| ENSG00000161958 | FGF11       | -3.397177551 | 0.000506526 | protein_coding |
| ENSG00000073067 | CYP2W1      | -3.322334161 | 0.013412089 | protein_coding |
| ENSG00000241360 | PDXP        | -3.265392632 | 3.94E-12    | protein_coding |
| ENSG00000205670 | SMIM11A     | -3.257429287 | 1.00E-09    | protein_coding |
| ENSG00000101084 | RAB5IF      | -3.233948316 | 6.03E-12    | protein_coding |
| ENSG00000168282 | MGAT2       | -3.231665043 | 9.00E-07    | protein_coding |
| ENSG00000180875 | GREM2       | -3.186952043 | 0.001597933 | protein_coding |
| ENSG00000179388 | EGR3        | -3.186440965 | 0.021566548 | protein_coding |
| ENSG00000135144 | DTX1        | -3.186440965 | 0.021566548 | protein_coding |
| ENSG00000176472 | ZNF575      | -3.186440965 | 0.021566548 | protein_coding |
| ENSG00000128482 | RNF112      | -3.186440965 | 0.021566548 | protein_coding |
| ENSG00000058673 | ZC3H11A     | -3.186440965 | 0.021566548 | protein_coding |
| ENSG00000244187 | TMEM141     | -3.173406503 | 3.81E-11    | protein_coding |
| ENSG00000181029 | TRAPPC5     | -3.126940244 | 1.03E-06    | protein_coding |
| ENSG00000179284 | DAND5       | -3.109470117 | 0.002364823 | protein_coding |
| ENSG00000184357 | HIST1H1B    | -3.036403613 | 0.034866602 | protein_coding |
| ENSG00000179580 | RNF151      | -3.036403613 | 0.034866602 | protein_coding |
| ENSG00000161929 | SCIMP       | -3.036403613 | 0.034866602 | protein_coding |
| ENSG00000116014 | KISS1R      | -3.024401896 | 0.000589    | protein_coding |
| ENSG00000158427 | TMSB15B     | -2.897294553 | 6.17E-08    | protein_coding |
| ENSG00000177989 | ODF3B       | -2.888440236 | 1.83E-05    | protein_coding |
| ENSG00000139540 | SLC39A5     | -2.848412224 | 0.007864773 | protein_coding |
| ENSG00000135100 | HNF1A       | -2.848412224 | 0.007864773 | protein_coding |
| ENSG00000259803 | SLC22A31    | -2.845946005 | 1.48E-06    | protein_coding |
| ENSG00000254413 | CHKB-CPT1B  | -2.840949818 | 0.001665133 | protein_coding |
| ENSG00000284874 | SEPT5-GP1BB | -2.77422135  | 0.002370371 | protein_coding |
| ENSG00000187902 | SHISA7      | -2.77422135  | 0.002370371 | protein_coding |
| ENSG00000168481 | LGI3        | -2.752560433 | 0.000280171 | protein_coding |
| ENSG00000230778 | ANKRD63     | -2.729114802 | 0.000137515 | protein_coding |
| ENSG00000179673 | RPRML       | -2.721793598 | 6.24E-07    | protein_coding |
| ENSG00000162959 | MEMO1       | -2.686711021 | 6.53E-06    | protein_coding |
| ENSG00000167996 | FTH1        | -2.671633874 | 1.17E-09    | protein_coding |
| ENSG00000213996 | TM6SF2      | -2.643783421 | 0.017862218 | protein_coding |
| ENSG00000173621 | LRFN4       | -2.593074649 | 8.91E-09    | protein_coding |
| ENSG00000243989 | ACY1        | -2.565352822 | 0.002275868 | protein_coding |
| ENSG00000001630 | CYP51A1     | -2.547082086 | 2.52E-07    | protein_coding |
| ENSG00000130748 | TMEM160     | -2.542065788 | 1.32E-08    | protein_coding |
| ENSG00000258429 | PDF         | -2.534975972 | 5.25E-08    | protein_coding |
| ENSG00000185883 | ATP6V0C     | -2.529984575 | 3.27E-06    | protein_coding |
| ENSG00000146221 | TCTE1       | -2.529443832 | 0.02704271  | protein_coding |



|                 |          |              |             |                |
|-----------------|----------|--------------|-------------|----------------|
| ENSG00000105251 | SHD      | -2.529443832 | 0.02704271  | protein_coding |
| ENSG00000174791 | RIN1     | -2.529443832 | 0.02704271  | protein_coding |
| ENSG00000009790 | TRAF3IP3 | -2.529443832 | 0.02704271  | protein_coding |
| ENSG00000106003 | LFNG     | -2.486360495 | 3.71E-05    | protein_coding |
| ENSG00000186010 | NDUFA13  | -2.48504363  | 1.96E-05    | protein_coding |
| ENSG00000149925 | ALDOA    | -2.472084412 | 1.14E-06    | protein_coding |
| ENSG00000162068 | NTN3     | -2.471361832 | 0.010033723 | protein_coding |
| ENSG00000168913 | ENHO     | -2.460844186 | 2.10E-07    | protein_coding |
| ENSG00000215612 | HMX1     | -2.447195519 | 3.98E-08    | protein_coding |
| ENSG00000176919 | C8G      | -2.405256265 | 0.041032031 | protein_coding |
| ENSG00000269226 | TMSB15B  | -2.405256265 | 0.041032031 | protein_coding |
| ENSG00000146216 | TTBK1    | -2.405256265 | 0.041032031 | protein_coding |
| ENSG00000176153 | GPX2     | -2.405256265 | 0.041032031 | protein_coding |
| ENSG00000204335 | SP5      | -2.405256265 | 0.041032031 | protein_coding |
| ENSG00000169314 | C22orf15 | -2.384553021 | 0.014485426 | protein_coding |
| ENSG00000141744 | PNMT     | -2.373768745 | 0.006072876 | protein_coding |
| ENSG00000100300 | TSPO     | -2.352138624 | 6.66E-08    | protein_coding |
| ENSG00000161992 | PRR35    | -2.351271263 | 0.000110315 | protein_coding |
| ENSG00000156875 | MFSD14A  | -2.328395513 | 9.69E-05    | protein_coding |
| ENSG00000099866 | MADCAM1  | -2.321501041 | 0.000660415 | protein_coding |
| ENSG00000271303 | SRXN1    | -2.321422709 | 1.01E-05    | protein_coding |
| ENSG00000130700 | GATA5    | -2.31556555  | 0.001998931 | protein_coding |
| ENSG00000132522 | GPS2     | -2.309260746 | 1.13E-05    | protein_coding |
| ENSG00000183397 | C19orf71 | -2.2369455   | 0.000197348 | protein_coding |
| ENSG00000105963 | ADAP1    | -2.230559877 | 6.96E-06    | protein_coding |
| ENSG00000184702 | 5-Sep    | -2.224235728 | 0.000812684 | protein_coding |
| ENSG00000116032 | GRIN3B   | -2.209388459 | 0.001356148 | protein_coding |
| ENSG00000179886 | TIGD5    | -2.205856409 | 6.81E-07    | protein_coding |
| ENSG00000164794 | KCNV1    | -2.193495067 | 0.030348148 | protein_coding |
| ENSG00000100038 | TOP3B    | -2.189574085 | 0.001019268 | protein_coding |
| ENSG00000251493 | FOXD1    | -2.179038484 | 7.84E-07    | protein_coding |
| ENSG00000160255 | ITGB2    | -2.164223407 | 0.004621058 | protein_coding |
| ENSG00000149489 | ROM1     | -2.164223407 | 0.004621058 | protein_coding |
| ENSG00000280789 | PAGR1    | -2.153001984 | 2.01E-06    | protein_coding |
| ENSG00000182327 | GLTPD2   | -2.141142966 | 0.000974164 | protein_coding |
| ENSG00000168209 | DDIT4    | -2.1375022   | 9.44E-07    | protein_coding |
| ENSG00000262814 | MRPL12   | -2.130133222 | 1.24E-06    | protein_coding |
| ENSG00000272325 | NUDT3    | -2.109573689 | 7.07E-06    | protein_coding |
| ENSG00000167680 | SEMA6B   | -2.095270688 | 6.21E-06    | protein_coding |
| ENSG00000178809 | TRIM73   | -2.087555688 | 0.043991311 | protein_coding |
| ENSG00000148357 | HMCN2    | -2.087555688 | 0.043991311 | protein_coding |
| ENSG00000213658 | LAT      | -2.087555688 | 0.043991311 | protein_coding |
| ENSG00000179304 | FAM156B  | -2.087555688 | 0.043991311 | protein_coding |

|                 |            |              |             |                |
|-----------------|------------|--------------|-------------|----------------|
| ENSG00000130287 | NCAN       | -2.087555688 | 0.043991311 | protein_coding |
| ENSG00000116176 | TPSG1      | -2.087555688 | 0.043991311 | protein_coding |
| ENSG00000177374 | HIC1       | -2.07177523  | 0.000284129 | protein_coding |
| ENSG00000151322 | NPAS3      | -2.070909227 | 0.023070854 | protein_coding |
| ENSG00000240972 | MIF        | -2.053720637 | 0.008135331 | protein_coding |
| ENSG00000243449 | C4orf48    | -2.05284796  | 3.40E-06    | protein_coding |
| ENSG00000131650 | KREMEN2    | -2.050475964 | 2.00E-05    | protein_coding |
| ENSG00000185668 | POU3F1     | -2.049505845 | 0.000283294 | protein_coding |
| ENSG00000187045 | TMPRSS6    | -2.04870614  | 0.005290723 | protein_coding |
| ENSG00000172936 | MYD88      | -2.040688197 | 0.000105733 | protein_coding |
| ENSG00000167136 | ENDOG      | -2.039623575 | 4.70E-06    | protein_coding |
| ENSG00000015413 | DPEP1      | -2.000689275 | 0.004613369 | protein_coding |
| ENSG00000159674 | SPON2      | -1.998299844 | 0.006891763 | protein_coding |
| ENSG00000273238 | TMEM271    | -1.996840618 | 0.000168126 | protein_coding |
| ENSG00000181284 | TMEM102    | -1.996482614 | 2.55E-05    | protein_coding |
| ENSG00000267216 | AC020915.1 | -1.990697743 | 0.018003167 | protein_coding |
| ENSG00000130176 | CNN1       | -1.990697743 | 0.018003167 | protein_coding |
| ENSG00000245848 | CEBPA      | -1.985133365 | 1.20E-05    | protein_coding |
| ENSG00000203896 | LIME1      | -1.984343973 | 0.000784949 | protein_coding |
| ENSG00000182103 | FAM181B    | -1.984343973 | 0.000784949 | protein_coding |
| ENSG00000183628 | DGCR6      | -1.984100416 | 0.032292239 | protein_coding |
| ENSG00000178531 | CTXN1      | -1.974980718 | 6.36E-06    | protein_coding |
| ENSG00000142694 | EVA1B      | -1.97018595  | 0.000170467 | protein_coding |
| ENSG00000204176 | SYT15      | -1.963919068 | 0.000243382 | protein_coding |
| ENSG00000181409 | AATK       | -1.960546366 | 6.69E-05    | protein_coding |
| ENSG00000249931 | GOLGA8K    | -1.955065557 | 0.005911861 | protein_coding |
| ENSG00000167550 | RHEBL1     | -1.938348528 | 0.002617946 | protein_coding |
| ENSG00000213977 | TAX1BP3    | -1.93404662  | 0.014380224 | protein_coding |
| ENSG00000235169 | SMIM1      | -1.93404662  | 0.014380224 | protein_coding |
| ENSG00000181408 | UTS2R      | -1.918942783 | 0.000310788 | protein_coding |
| ENSG00000183048 | SLC25A10   | -1.917883634 | 1.39E-05    | protein_coding |
| ENSG00000107738 | VSIR       | -1.91716585  | 0.024510598 | protein_coding |
| ENSG00000183476 | SH2D7      | -1.91716585  | 0.024510598 | protein_coding |
| ENSG00000248643 | RBM14-RBM4 | -1.91716585  | 0.024510598 | protein_coding |
| ENSG00000274791 | F8A2       | -1.91716585  | 0.024510598 | protein_coding |
| ENSG00000100836 | PABPN1     | -1.914210053 | 7.97E-06    | protein_coding |
| ENSG00000198242 | RPL23A     | -1.911432662 | 6.85E-06    | protein_coding |
| ENSG00000167700 | MFSD3      | -1.910407228 | 8.96E-06    | protein_coding |
| ENSG00000162373 | BEND5      | -1.891731886 | 0.045202178 | protein_coding |
| ENSG00000166337 | TAF10      | -1.875205813 | 3.76E-05    | protein_coding |
| ENSG00000166206 | GABRB3     | -1.874113722 | 0.000614658 | protein_coding |
| ENSG00000179168 | GGN        | -1.870268559 | 0.019137366 | protein_coding |
| ENSG00000203883 | SOX18      | -1.864247677 | 0.000177085 | protein_coding |

|                 |            |              |             |                |
|-----------------|------------|--------------|-------------|----------------|
| ENSG00000167964 | RAB26      | -1.853594609 | 0.000291081 | protein_coding |
| ENSG00000103260 | METRN      | -1.850300774 | 2.86E-05    | protein_coding |
| ENSG00000182511 | FES        | -1.848025648 | 0.00355334  | protein_coding |
| ENSG00000196118 | CCDC189    | -1.846404794 | 0.000288547 | protein_coding |
| ENSG00000186193 | SAPCD2     | -1.846104423 | 2.05E-05    | protein_coding |
| ENSG00000259529 | AL136295.5 | -1.839683923 | 0.033376343 | protein_coding |
| ENSG00000100399 | CHADL      | -1.839683923 | 0.033376343 | protein_coding |
| ENSG00000253304 | TMEM200B   | -1.839683923 | 0.033376343 | protein_coding |
| ENSG00000261052 | SULT1A3    | -1.839683923 | 0.033376343 | protein_coding |
| ENSG00000105404 | RABAC1     | -1.834822233 | 8.47E-05    | protein_coding |
| ENSG00000278500 | AC009336.2 | -1.833247366 | 0.008204261 | protein_coding |
| ENSG00000198517 | MAFK       | -1.833182353 | 3.71E-05    | protein_coding |
| ENSG00000160161 | CILP2      | -1.830804302 | 0.000154123 | protein_coding |
| ENSG00000111775 | COX6A1     | -1.813333709 | 2.38E-05    | protein_coding |
| ENSG00000106992 | AK1        | -1.812504755 | 0.000536078 | protein_coding |
| ENSG00000008516 | MMP25      | -1.812038524 | 0.00701327  | protein_coding |
| ENSG00000125652 | ALKBH7     | -1.810669497 | 4.21E-05    | protein_coding |
| ENSG00000234965 | SHISA8     | -1.809508696 | 0.000124997 | protein_coding |
| ENSG00000145949 | MYLK4      | -1.808841046 | 0.012495401 | protein_coding |
| ENSG00000181781 | ODF3L2     | -1.803540091 | 0.025475297 | protein_coding |
| ENSG00000179588 | ZFPM1      | -1.802510128 | 7.10E-05    | protein_coding |
| ENSG00000117984 | CTSD       | -1.785162737 | 3.48E-05    | protein_coding |
| ENSG00000169972 | PUSL1      | -1.784149117 | 4.54E-05    | protein_coding |
| ENSG00000168061 | SAC3D1     | -1.782693185 | 3.77E-05    | protein_coding |
| ENSG00000127588 | GNG13      | -1.776969204 | 0.019987884 | protein_coding |
| ENSG00000173928 | SWSAP1     | -1.77667478  | 0.000469394 | protein_coding |
| ENSG00000131730 | CKMT2      | -1.770368427 | 0.008764824 | protein_coding |
| ENSG00000103024 | NME3       | -1.764825985 | 3.75E-05    | protein_coding |
| ENSG00000268606 | MAGEA2     | -1.761820358 | 0.001379077 | protein_coding |
| ENSG00000100926 | TM9SF1     | -1.760523929 | 0.00025249  | protein_coding |
| ENSG00000157766 | ACAN       | -1.757803372 | 0.045435959 | protein_coding |
| ENSG00000130812 | ANGPTL6    | -1.757803372 | 0.045435959 | protein_coding |
| ENSG00000144485 | HES6       | -1.756019231 | 5.89E-05    | protein_coding |
| ENSG00000198835 | GJC2       | -1.755536952 | 0.002621569 | protein_coding |
| ENSG00000174886 | NDUFA11    | -1.7523753   | 8.54E-05    | protein_coding |
| ENSG00000130675 | MNX1       | -1.751605187 | 5.74E-05    | protein_coding |
| ENSG00000225663 | MCRIP1     | -1.746415291 | 4.71E-05    | protein_coding |
| ENSG00000100726 | TELO2      | -1.745634563 | 3.91E-05    | protein_coding |
| ENSG00000187688 | TRPV2      | -1.733574945 | 0.033910222 | protein_coding |
| ENSG00000179862 | CITED4     | -1.729290739 | 0.000921866 | protein_coding |
| ENSG00000184163 | C1QTNF12   | -1.727458862 | 0.010958385 | protein_coding |
| ENSG00000180834 | MAP6D1     | -1.727458862 | 0.010958385 | protein_coding |
| ENSG00000160325 | CACFD1     | -1.725067717 | 0.000120811 | protein_coding |

|                 |            |              |             |                |
|-----------------|------------|--------------|-------------|----------------|
| ENSG00000257704 | INAFM1     | -1.724626615 | 0.000371577 | protein_coding |
| ENSG00000168040 | FADD       | -1.713340591 | 0.000106933 | protein_coding |
| ENSG00000167701 | GPT        | -1.709872628 | 0.000992022 | protein_coding |
| ENSG00000159423 | ALDH4A1    | -1.709031715 | 0.000384966 | protein_coding |
| ENSG00000161653 | NAGS       | -1.699851509 | 0.006889608 | protein_coding |
| ENSG00000239857 | GET4       | -1.697248025 | 0.000175395 | protein_coding |
| ENSG00000184897 | HIFX       | -1.694640269 | 6.12E-05    | protein_coding |
| ENSG00000213638 | ADAT3      | -1.694420859 | 0.000167991 | protein_coding |
| ENSG00000051523 | CYBA       | -1.693963712 | 0.000142788 | protein_coding |
| ENSG00000116544 | DLGAP3     | -1.687357982 | 0.005336669 | protein_coding |
| ENSG00000177045 | SIX5       | -1.677350881 | 0.00022047  | protein_coding |
| ENSG00000127564 | PKMYT1     | -1.672360128 | 8.51E-05    | protein_coding |
| ENSG00000132702 | HAPLN2     | -1.6700316   | 0.003514632 | protein_coding |
| ENSG00000130751 | NPAS1      | -1.665919435 | 0.000111871 | protein_coding |
| ENSG00000196976 | LAGE3      | -1.665298123 | 9.22E-05    | protein_coding |
| ENSG00000105327 | BBC3       | -1.660554226 | 0.000143524 | protein_coding |
| ENSG00000176532 | PRR15      | -1.660043051 | 0.045117465 | protein_coding |
| ENSG00000180044 | C3orf80    | -1.65836274  | 0.000829098 | protein_coding |
| ENSG00000188290 | HES4       | -1.655142807 | 9.80E-05    | protein_coding |
| ENSG00000188368 | PRR19      | -1.652113595 | 0.034088382 | protein_coding |
| ENSG00000113721 | PDGFRB     | -1.652113595 | 0.034088382 | protein_coding |
| ENSG00000103067 | ESRP2      | -1.646106876 | 0.026497687 | protein_coding |
| ENSG00000186998 | EMID1      | -1.64161145  | 0.000277653 | protein_coding |
| ENSG00000188152 | NUTM2G     | -1.641399137 | 0.021096335 | protein_coding |
| ENSG00000244274 | DBNDD2     | -1.641399137 | 0.021096335 | protein_coding |
| ENSG00000090971 | NAT14      | -1.639702413 | 0.000138832 | protein_coding |
| ENSG00000182871 | COL18A1    | -1.637530104 | 0.000126577 | protein_coding |
| ENSG00000261221 | ZNF865     | -1.636565973 | 0.000176016 | protein_coding |
| ENSG00000099625 | CBARP      | -1.632244504 | 0.000436055 | protein_coding |
| ENSG00000158792 | SPATA2L    | -1.63194428  | 0.000200983 | protein_coding |
| ENSG00000198576 | ARC        | -1.622247281 | 0.005296084 | protein_coding |
| ENSG00000143382 | ADAMTSL4   | -1.620303293 | 0.004313732 | protein_coding |
| ENSG00000161955 | TNFSF13    | -1.619468525 | 0.003928027 | protein_coding |
| ENSG00000125657 | TNFSF9     | -1.616024352 | 0.000625839 | protein_coding |
| ENSG00000163362 | INAVA      | -1.613367862 | 0.001575555 | protein_coding |
| ENSG00000204060 | FOXO6      | -1.611066591 | 0.001096601 | protein_coding |
| ENSG00000104899 | AMH        | -1.610898616 | 0.000189366 | protein_coding |
| ENSG00000161847 | RAVER1     | -1.606259028 | 0.000159246 | protein_coding |
| ENSG00000130589 | HELZ2      | -1.600021213 | 0.000231284 | protein_coding |
| ENSG00000119673 | ACOT2      | -1.599032526 | 0.000202281 | protein_coding |
| ENSG00000163995 | ABLIM2     | -1.596505422 | 0.004998675 | protein_coding |
| ENSG00000172346 | CSDC2      | -1.59618791  | 0.005549857 | protein_coding |
| ENSG00000285043 | AC093512.2 | -1.59618791  | 0.005549857 | protein_coding |

|                 |                    |              |             |                |
|-----------------|--------------------|--------------|-------------|----------------|
| ENSG00000174276 | ZNHIT2             | -1.594523944 | 0.000324665 | protein_coding |
| ENSG00000130643 | CALY               | -1.593923998 | 0.010511842 | protein_coding |
| ENSG00000166546 | BEAN1              | -1.590496342 | 0.021443929 | protein_coding |
| ENSG00000158050 | DUSP2              | -1.586241643 | 0.001591919 | protein_coding |
| ENSG00000183186 | C2CD4C             | -1.586241643 | 0.001591919 | protein_coding |
| ENSG00000171017 | LRRC8E             | -1.585385127 | 0.044489089 | protein_coding |
| ENSG00000130829 | DUSP9              | -1.583915424 | 0.000186446 | protein_coding |
| ENSG00000244486 | SCARF2             | -1.579339663 | 0.000234094 | protein_coding |
| ENSG00000197019 | SERTAD1            | -1.57716137  | 0.000849028 | protein_coding |
| ENSG00000162591 | MEGF6              | -1.575306479 | 0.001531537 | protein_coding |
| ENSG00000104524 | PYCR3              | -1.574983191 | 0.000224227 | protein_coding |
| ENSG00000175756 | AURKAIP1           | -1.573816034 | 0.000204152 | protein_coding |
| ENSG00000196421 | C20orf204          | -1.573754999 | 0.00522492  | protein_coding |
| ENSG00000161682 | FAM171A2           | -1.572729854 | 0.000249673 | protein_coding |
| ENSG00000181588 | MEX3D              | -1.570954588 | 0.000264409 | protein_coding |
| ENSG00000218891 | ZNF579             | -1.568788315 | 0.000304621 | protein_coding |
| ENSG00000198113 | TOR4A              | -1.56843775  | 0.002266125 | protein_coding |
| ENSG00000026036 | RTEL1-<br>TNFRSF6B | -1.567327832 | 0.002403488 | protein_coding |
| ENSG00000160401 | CFAP157            | -1.567327832 | 0.002403488 | protein_coding |
| ENSG00000103254 | FAM173A            | -1.564879665 | 0.00032642  | protein_coding |
| ENSG00000176340 | COX8A              | -1.563921952 | 0.000240056 | protein_coding |
| ENSG00000185269 | NOTUM              | -1.562165648 | 0.010850785 | protein_coding |
| ENSG00000169750 | RAC3               | -1.553093639 | 0.000238837 | protein_coding |
| ENSG00000006327 | TNFRSF12A          | -1.546730772 | 0.001549286 | protein_coding |
| ENSG00000146826 | C7orf43            | -1.539534275 | 0.000474189 | protein_coding |
| ENSG00000129911 | KLF16              | -1.538945922 | 0.000352641 | protein_coding |
| ENSG00000136826 | KLF4               | -1.535852656 | 0.00167674  | protein_coding |
| ENSG00000283378 | CNTNAP3C           | -1.534974084 | 0.033832332 | protein_coding |
| ENSG00000131116 | ZNF428             | -1.533588802 | 0.000371098 | protein_coding |
| ENSG00000180828 | BHLHE22            | -1.529093248 | 0.01296303  | protein_coding |
| ENSG00000129932 | DOHH               | -1.527397988 | 0.000384771 | protein_coding |
| ENSG00000249992 | TMEM158            | -1.52468671  | 0.000615234 | protein_coding |
| ENSG00000168936 | TMEM129            | -1.523893988 | 0.000329865 | protein_coding |
| ENSG00000140323 | DISP2              | -1.522074389 | 0.004879682 | protein_coding |
| ENSG00000213563 | C8orf82            | -1.519092291 | 0.00039331  | protein_coding |
| ENSG00000174871 | CNIH2              | -1.519031864 | 0.003322547 | protein_coding |
| ENSG00000171811 | CFAP46             | -1.517562331 | 0.018121122 | protein_coding |
| ENSG00000104529 | EEF1D              | -1.513644708 | 0.000338249 | protein_coding |
| ENSG00000151651 | ADAM8              | -1.511641142 | 0.003034831 | protein_coding |
| ENSG00000220008 | LINGO3             | -1.510323509 | 0.021872151 | protein_coding |
| ENSG00000139192 | TAPBPL             | -1.510323509 | 0.021872151 | protein_coding |
| ENSG00000185988 | PLK5               | -1.508197631 | 0.011440165 | protein_coding |

|                 |            |              |             |                |
|-----------------|------------|--------------|-------------|----------------|
| ENSG00000185215 | TNFAIP2    | -1.508197631 | 0.011440165 | protein_coding |
| ENSG00000103269 | RHBDL1     | -1.507007349 | 0.001954481 | protein_coding |
| ENSG00000103326 | CAPN15     | -1.489813759 | 0.000407232 | protein_coding |
| ENSG00000167397 | VKORC1     | -1.487667529 | 0.001382596 | protein_coding |
| ENSG00000185761 | ADAMTSL5   | -1.487336061 | 0.018332243 | protein_coding |
| ENSG00000169230 | PRELID1    | -1.48588687  | 0.00041089  | protein_coding |
| ENSG00000161956 | SENP3      | -1.47917144  | 0.000520095 | protein_coding |
| ENSG00000151006 | PRSS53     | -1.477903224 | 0.013488043 | protein_coding |
| ENSG00000105135 | ILVBL      | -1.477512373 | 0.000494941 | protein_coding |
| ENSG00000173638 | SLC19A1    | -1.472577967 | 0.000496992 | protein_coding |
| ENSG00000185347 | TEDC1      | -1.47070664  | 0.000560849 | protein_coding |
| ENSG00000184343 | SRPK3      | -1.470696337 | 0.003296007 | protein_coding |
| ENSG00000105722 | ERF        | -1.467610931 | 0.000562435 | protein_coding |
| ENSG00000221821 | C6orf226   | -1.467413944 | 0.026780029 | protein_coding |
| ENSG00000167100 | SAMD14     | -1.466295295 | 0.008470153 | protein_coding |
| ENSG00000129951 | PLPPR3     | -1.463186832 | 0.001051065 | protein_coding |
| ENSG00000285976 | AL135905.2 | -1.462436335 | 0.002982265 | protein_coding |
| ENSG00000174021 | GNG5       | -1.462414178 | 0.001391223 | protein_coding |
| ENSG00000165804 | ZNF219     | -1.461827192 | 0.000695952 | protein_coding |
| ENSG00000129993 | CBFA2T3    | -1.456602972 | 0.007809391 | protein_coding |
| ENSG00000126062 | TMEM115    | -1.456082998 | 0.00062013  | protein_coding |
| ENSG00000168961 | LGALS9     | -1.45462268  | 0.033173684 | protein_coding |
| ENSG00000137267 | TUBB2A     | -1.453433533 | 0.000708874 | protein_coding |
| ENSG00000243678 | NME2       | -1.448900869 | 0.004090345 | protein_coding |
| ENSG00000182325 | FBXL6      | -1.447717078 | 0.00077698  | protein_coding |
| ENSG00000261150 | EPPK1      | -1.44695901  | 0.015902772 | protein_coding |
| ENSG00000122592 | HOXA7      | -1.444405504 | 0.004370755 | protein_coding |
| ENSG00000212123 | PRR22      | -1.44370519  | 0.001506118 | protein_coding |
| ENSG00000168993 | CPLX1      | -1.439481129 | 0.001129045 | protein_coding |
| ENSG00000160446 | ZDHHC12    | -1.439416324 | 0.000910093 | protein_coding |
| ENSG00000175602 | CCDC85B    | -1.435706886 | 0.000724138 | protein_coding |
| ENSG00000126603 | GLIS2      | -1.433720872 | 0.002518779 | protein_coding |
| ENSG00000128713 | HOXD11     | -1.431960125 | 0.001082401 | protein_coding |
| ENSG00000172366 | MCRIP2     | -1.430211973 | 0.000893224 | protein_coding |
| ENSG00000127585 | FBXL16     | -1.429717333 | 0.00433205  | protein_coding |
| ENSG00000158747 | NBL1       | -1.416426598 | 0.001404642 | protein_coding |
| ENSG00000188157 | AGRN       | -1.414829477 | 0.000806122 | protein_coding |
| ENSG00000183114 | FAM43B     | -1.412177801 | 0.004566454 | protein_coding |
| ENSG00000205544 | TMEM256    | -1.406535489 | 0.002551178 | protein_coding |
| ENSG00000144488 | ESPNL      | -1.406378744 | 0.001523294 | protein_coding |
| ENSG00000205609 | EIF3CL     | -1.405972189 | 0.001327587 | protein_coding |
| ENSG00000168802 | CHTF8      | -1.405895171 | 0.000871169 | protein_coding |
| ENSG00000125820 | NKX2-2     | -1.402558722 | 0.006166847 | protein_coding |

|                 |            |              |             |                |
|-----------------|------------|--------------|-------------|----------------|
| ENSG00000188322 | SBK1       | -1.401639701 | 0.001340018 | protein_coding |
| ENSG00000142235 | LMTK3      | -1.401100663 | 0.004513382 | protein_coding |
| ENSG00000138119 | MYOF       | -1.400297207 | 0.010248829 | protein_coding |
| ENSG00000183741 | CBX6       | -1.39788218  | 0.000852223 | protein_coding |
| ENSG00000128626 | MRPS12     | -1.395255061 | 0.000977952 | protein_coding |
| ENSG00000099974 | DDTL       | -1.39450865  | 0.0029212   | protein_coding |
| ENSG00000161970 | RPL26      | -1.394330913 | 0.001028732 | protein_coding |
| ENSG00000131187 | F12        | -1.394026179 | 0.001842597 | protein_coding |
| ENSG00000185090 | MANEAL     | -1.393669345 | 0.001113075 | protein_coding |
| ENSG00000133597 | ADCK2      | -1.393607793 | 0.000991389 | protein_coding |
| ENSG00000123576 | ESX1       | -1.392374621 | 0.008684563 | protein_coding |
| ENSG00000185022 | MAFF       | -1.391629371 | 0.011442905 | protein_coding |
| ENSG00000182612 | TSPAN10    | -1.391267345 | 0.003028139 | protein_coding |
| ENSG00000179044 | EXOC3L1    | -1.388656935 | 0.026398783 | protein_coding |
| ENSG00000167702 | KIFC2      | -1.387956726 | 0.001353959 | protein_coding |
| ENSG00000254470 | AP5B1      | -1.387649647 | 0.001104642 | protein_coding |
| ENSG00000184990 | SIVA1      | -1.387340759 | 0.00095807  | protein_coding |
| ENSG00000276345 | AC004556.1 | -1.384584798 | 0.0095587   | protein_coding |
| ENSG00000184916 | JAG2       | -1.3825477   | 0.00112842  | protein_coding |
| ENSG00000066230 | SLC9A3     | -1.379384914 | 0.005822763 | protein_coding |
| ENSG00000132003 | ZSWIM4     | -1.379218481 | 0.008225538 | protein_coding |
| ENSG00000177943 | MAMDC4     | -1.378180106 | 0.004048099 | protein_coding |
| ENSG00000132329 | RAMP1      | -1.37761371  | 0.001649936 | protein_coding |
| ENSG00000125775 | SDCBP2     | -1.377565193 | 0.040101413 | protein_coding |
| ENSG00000184281 | TSSC4      | -1.377188185 | 0.001270967 | protein_coding |
| ENSG00000171443 | ZNF524     | -1.373769351 | 0.004247991 | protein_coding |
| ENSG00000213445 | SIPA1      | -1.373687616 | 0.001305075 | protein_coding |
| ENSG00000162413 | KLHL21     | -1.372197991 | 0.001268824 | protein_coding |
| ENSG00000162302 | RPS6KA4    | -1.370278378 | 0.001335543 | protein_coding |
| ENSG00000117862 | TXNDC12    | -1.3702094   | 0.002189851 | protein_coding |
| ENSG00000185615 | PDIA2      | -1.369181327 | 0.004464258 | protein_coding |
| ENSG00000238227 | TMEM250    | -1.368658926 | 0.001135571 | protein_coding |
| ENSG00000160113 | NR2F6      | -1.368101521 | 0.001151411 | protein_coding |
| ENSG00000105559 | PLEKHA4    | -1.366667351 | 0.006714756 | protein_coding |
| ENSG00000008710 | PKD1       | -1.366393646 | 0.001200451 | protein_coding |
| ENSG00000115266 | APC2       | -1.365993073 | 0.002567315 | protein_coding |
| ENSG00000129757 | CDKN1C     | -1.365326769 | 0.006369487 | protein_coding |
| ENSG00000161996 | WDR90      | -1.362523633 | 0.001325042 | protein_coding |
| ENSG00000165655 | ZNF503     | -1.361161074 | 0.001207805 | protein_coding |
| ENSG00000123360 | PDE1B      | -1.361070426 | 0.005330258 | protein_coding |
| ENSG00000122971 | ACADS      | -1.36062162  | 0.001749744 | protein_coding |
| ENSG00000183317 | EPHA10     | -1.360498938 | 0.016548945 | protein_coding |
| ENSG00000160685 | ZBTB7B     | -1.359887632 | 0.001555867 | protein_coding |

|                 |                  |              |             |                |
|-----------------|------------------|--------------|-------------|----------------|
| ENSG00000167543 | TP53I13          | -1.35797079  | 0.001510799 | protein_coding |
| ENSG00000130511 | SSBP4            | -1.356654547 | 0.00133384  | protein_coding |
| ENSG00000262246 | CORO7            | -1.355725985 | 0.004153771 | protein_coding |
| ENSG00000174939 | ASPHD1           | -1.354960289 | 0.010860269 | protein_coding |
| ENSG00000185803 | SLC52A2          | -1.348490377 | 0.001573675 | protein_coding |
| ENSG00000161677 | JOSD2            | -1.346841356 | 0.002666411 | protein_coding |
| ENSG00000178149 | DALRD3           | -1.345879776 | 0.002179059 | protein_coding |
| ENSG00000106006 | HOXA6            | -1.345821169 | 0.003923782 | protein_coding |
| ENSG00000126709 | IFI6             | -1.345263198 | 0.010994238 | protein_coding |
| ENSG00000130052 | STARD8           | -1.343871295 | 0.0070897   | protein_coding |
| ENSG00000188760 | TMEM198          | -1.340958501 | 0.002529213 | protein_coding |
| ENSG00000107281 | NPDC1            | -1.338521934 | 0.001705223 | protein_coding |
| ENSG00000171425 | ZNF581           | -1.33816155  | 0.001825393 | protein_coding |
| ENSG00000176428 | VPS37D           | -1.337423398 | 0.005728899 | protein_coding |
| ENSG00000149761 | NUDT22           | -1.336489671 | 0.002559538 | protein_coding |
| ENSG00000187730 | GABRD            | -1.336489285 | 0.008637514 | protein_coding |
| ENSG00000159214 | CCDC24           | -1.335323606 | 0.014864917 | protein_coding |
| ENSG00000100429 | HDAC10           | -1.334974326 | 0.0167062   | protein_coding |
| ENSG00000170608 | FOXA3            | -1.334067115 | 0.021979843 | protein_coding |
| ENSG00000156860 | FBR5             | -1.333802682 | 0.001483329 | protein_coding |
| ENSG00000168477 | TNXB             | -1.332708768 | 0.031103696 | protein_coding |
| ENSG00000100918 | REC8             | -1.332708768 | 0.031103696 | protein_coding |
| ENSG00000069482 | GAL              | -1.331337472 | 0.001595051 | protein_coding |
| ENSG00000127220 | ABHD8            | -1.330932928 | 0.003639631 | protein_coding |
| ENSG00000168071 | CCDC88B          | -1.330677135 | 0.006953612 | protein_coding |
| ENSG00000254995 | STX16-<br>NPEPL1 | -1.330451424 | 0.049028188 | protein_coding |
| ENSG00000204388 | HSPA1B           | -1.320040048 | 0.001663938 | protein_coding |
| ENSG00000160326 | SLC2A6           | -1.318739986 | 0.002915705 | protein_coding |
| ENSG00000177427 | MIEF2            | -1.316724581 | 0.002837651 | protein_coding |
| ENSG00000117013 | KCNQ4            | -1.316549776 | 0.013582069 | protein_coding |
| ENSG00000128242 | GAL3ST1          | -1.31608452  | 0.030695741 | protein_coding |
| ENSG00000170604 | IRF2BP1          | -1.314350757 | 0.001815214 | protein_coding |
| ENSG00000151611 | MMAA             | -1.312998796 | 0.016825845 | protein_coding |
| ENSG00000181649 | PHLDA2           | -1.309781524 | 0.012477797 | protein_coding |
| ENSG00000127666 | TICAM1           | -1.309781524 | 0.012477797 | protein_coding |
| ENSG00000261794 | GOLGA8H          | -1.308863147 | 0.04754413  | protein_coding |
| ENSG00000185112 | FAM43A           | -1.305395119 | 0.005916014 | protein_coding |
| ENSG00000239264 | TXNDC5           | -1.304809098 | 0.0035895   | protein_coding |
| ENSG00000213906 | LTB4R2           | -1.304113006 | 0.010498239 | protein_coding |
| ENSG00000025708 | TYMP             | -1.302010095 | 0.012577059 | protein_coding |
| ENSG00000104883 | PEX11G           | -1.302010095 | 0.012577059 | protein_coding |
| ENSG00000214967 | NPIPA7           | -1.302010095 | 0.012577059 | protein_coding |



|                 |          |              |             |                |
|-----------------|----------|--------------|-------------|----------------|
| ENSG00000136295 | TTYH3    | -1.300515356 | 0.001920975 | protein_coding |
| ENSG00000163874 | ZC3H12A  | -1.300373534 | 0.00690822  | protein_coding |
| ENSG00000149809 | TM7SF2   | -1.299025738 | 0.002939148 | protein_coding |
| ENSG00000099849 | RASSF7   | -1.298627581 | 0.003122318 | protein_coding |
| ENSG00000173546 | CSPG4    | -1.296174414 | 0.005761229 | protein_coding |
| ENSG00000160226 | CFAP410  | -1.294244348 | 0.004697147 | protein_coding |
| ENSG00000188763 | FZD9     | -1.29312195  | 0.003701595 | protein_coding |
| ENSG00000136167 | LCP1     | -1.29033177  | 0.003023635 | protein_coding |
| ENSG00000142544 | CTU1     | -1.289869645 | 0.002994335 | protein_coding |
| ENSG00000184160 | ADRA2C   | -1.28896409  | 0.002676693 | protein_coding |
| ENSG00000161835 | GRASP    | -1.287609968 | 0.029914245 | protein_coding |
| ENSG00000063176 | SPHK2    | -1.287010695 | 0.003058123 | protein_coding |
| ENSG00000105376 | ICAM5    | -1.286950453 | 0.003130647 | protein_coding |
| ENSG00000068137 | PLEKHH3  | -1.286157506 | 0.002463842 | protein_coding |
| ENSG00000185818 | NAT8L    | -1.284035882 | 0.002304281 | protein_coding |
| ENSG00000186907 | RTN4RL2  | -1.282056262 | 0.004636612 | protein_coding |
| ENSG00000160345 | C9orf116 | -1.280823322 | 0.006242505 | protein_coding |
| ENSG00000198931 | APRT     | -1.280593277 | 0.002185917 | protein_coding |
| ENSG00000148832 | PAOX     | -1.277088579 | 0.016984831 | protein_coding |
| ENSG00000147119 | CHST7    | -1.276140506 | 0.004573553 | protein_coding |
| ENSG00000129194 | SOX15    | -1.275322412 | 0.029542889 | protein_coding |
| ENSG00000109906 | ZBTB16   | -1.275322412 | 0.029542889 | protein_coding |
| ENSG00000214026 | MRPL23   | -1.272473443 | 0.002516834 | protein_coding |
| ENSG00000163623 | NKX6-1   | -1.267987523 | 0.004069632 | protein_coding |
| ENSG00000136490 | LIMD2    | -1.266889828 | 0.003579474 | protein_coding |
| ENSG00000111786 | SRSF9    | -1.261109563 | 0.0025382   | protein_coding |
| ENSG00000168000 | BSCL2    | -1.258943275 | 0.043684225 | protein_coding |
| ENSG00000161328 | LRRC56   | -1.258808248 | 0.021473972 | protein_coding |
| ENSG00000119669 | IRF2BPL  | -1.256991907 | 0.003399879 | protein_coding |
| ENSG00000128011 | LRFN1    | -1.256213367 | 0.003293086 | protein_coding |
| ENSG00000267796 | LIN37    | -1.25598746  | 0.034842559 | protein_coding |
| ENSG00000162576 | MXRA8    | -1.255806331 | 0.005461128 | protein_coding |
| ENSG00000008283 | CYB561   | -1.255793606 | 0.004510333 | protein_coding |
| ENSG00000143590 | EFNA3    | -1.254984185 | 0.007182091 | protein_coding |
| ENSG00000126391 | FRMD8    | -1.250426799 | 0.003175703 | protein_coding |
| ENSG00000119559 | C19orf25 | -1.249386046 | 0.003203421 | protein_coding |
| ENSG00000169884 | WNT10B   | -1.248941764 | 0.004876986 | protein_coding |
| ENSG00000126461 | SCAF1    | -1.24873143  | 0.002868972 | protein_coding |
| ENSG00000174307 | PHLDA3   | -1.248159492 | 0.003284778 | protein_coding |
| ENSG00000188549 | CCDC9B   | -1.246647469 | 0.01145021  | protein_coding |
| ENSG00000167968 | DNASE1L2 | -1.245907925 | 0.042571852 | protein_coding |
| ENSG00000162066 | AMDHD2   | -1.245735581 | 0.005003214 | protein_coding |
| ENSG00000112787 | FBRSL1   | -1.244274465 | 0.002912174 | protein_coding |

|                 |            |              |             |                |
|-----------------|------------|--------------|-------------|----------------|
| ENSG00000142330 | CAPN10     | -1.244168393 | 0.003600321 | protein_coding |
| ENSG00000007541 | PIGQ       | -1.244165011 | 0.003281797 | protein_coding |
| ENSG00000213923 | CSNK1E     | -1.241899901 | 0.0029589   | protein_coding |
| ENSG00000243279 | PRAF2      | -1.239026686 | 0.005577294 | protein_coding |
| ENSG00000125931 | CITED1     | -1.237851965 | 0.004995688 | protein_coding |
| ENSG00000104044 | OCA2       | -1.234346983 | 0.010492033 | protein_coding |
| ENSG00000136856 | SLC2A8     | -1.234276275 | 0.004011908 | protein_coding |
| ENSG00000167600 | CYP2S1     | -1.234021272 | 0.011041262 | protein_coding |
| ENSG00000115884 | SDC1       | -1.232996722 | 0.004620553 | protein_coding |
| ENSG00000130881 | LRP3       | -1.232420323 | 0.003287898 | protein_coding |
| ENSG00000161618 | ALDH16A1   | -1.23101991  | 0.004073274 | protein_coding |
| ENSG00000120913 | PDLIM2     | -1.230860585 | 0.018901676 | protein_coding |
| ENSG00000066735 | KIF26A     | -1.229772187 | 0.003468016 | protein_coding |
| ENSG00000221838 | AP4M1      | -1.228582769 | 0.005454297 | protein_coding |
| ENSG00000173153 | ESRRA      | -1.22528042  | 0.003776767 | protein_coding |
| ENSG00000163888 | CAMK2N2    | -1.223656254 | 0.040567706 | protein_coding |
| ENSG00000118231 | CRYGD      | -1.22245883  | 0.009862478 | protein_coding |
| ENSG00000132507 | EIF5A      | -1.221978876 | 0.003341394 | protein_coding |
| ENSG00000165644 | COMTD1     | -1.221667942 | 0.003976322 | protein_coding |
| ENSG00000198324 | PHETA1     | -1.220589926 | 0.005507158 | protein_coding |
| ENSG00000167536 | DHRS13     | -1.218440374 | 0.005948764 | protein_coding |
| ENSG00000128311 | TST        | -1.217707141 | 0.004225961 | protein_coding |
| ENSG00000128274 | A4GALT     | -1.215796078 | 0.023740669 | protein_coding |
| ENSG00000074181 | NOTCH3     | -1.215154806 | 0.003850168 | protein_coding |
| ENSG00000179431 | FJX1       | -1.213583197 | 0.004426543 | protein_coding |
| ENSG00000167716 | WDR81      | -1.213099061 | 0.004361129 | protein_coding |
| ENSG00000196711 | ALKAL1     | -1.211852901 | 0.013557267 | protein_coding |
| ENSG00000008735 | MAPK8IP2   | -1.210433725 | 0.003973741 | protein_coding |
| ENSG00000160360 | GPSM1      | -1.209112325 | 0.004042095 | protein_coding |
| ENSG00000183691 | NOG        | -1.206050154 | 0.007983103 | protein_coding |
| ENSG00000126749 | EMG1       | -1.205582318 | 0.004406156 | protein_coding |
| ENSG00000125510 | OPRL1      | -1.205362441 | 0.038817849 | protein_coding |
| ENSG00000165886 | UBTD1      | -1.205244554 | 0.005685451 | protein_coding |
| ENSG00000160991 | ORAI2      | -1.204567574 | 0.004730026 | protein_coding |
| ENSG00000139832 | RAB20      | -1.204221154 | 0.023443495 | protein_coding |
| ENSG00000277758 | FO681492.1 | -1.202299244 | 0.014618718 | protein_coding |
| ENSG00000040608 | RTN4R      | -1.200696193 | 0.010018876 | protein_coding |
| ENSG00000009694 | TENM1      | -1.200469408 | 0.006077466 | protein_coding |
| ENSG00000152082 | MZT2B      | -1.200361585 | 0.004410352 | protein_coding |
| ENSG00000179111 | HES7       | -1.199549415 | 0.048597149 | protein_coding |
| ENSG00000081692 | JMJD4      | -1.199517795 | 0.005145234 | protein_coding |
| ENSG00000108839 | ALOX12     | -1.197838705 | 0.013743256 | protein_coding |
| ENSG00000141965 | FEM1A      | -1.197007439 | 0.00700597  | protein_coding |

|                 |          |              |             |                |
|-----------------|----------|--------------|-------------|----------------|
| ENSG00000103245 | CIAO3    | -1.196263532 | 0.004797722 | protein_coding |
| ENSG00000204387 | C6orf48  | -1.196090099 | 0.005847008 | protein_coding |
| ENSG00000112658 | SRF      | -1.195538717 | 0.004382231 | protein_coding |
| ENSG00000197982 | C1orf122 | -1.194002323 | 0.005152789 | protein_coding |
| ENSG00000125753 | VASP     | -1.193956331 | 0.004878744 | protein_coding |
| ENSG00000198108 | CHSY3    | -1.192263441 | 0.015803617 | protein_coding |
| ENSG00000186654 | PRR5     | -1.191538025 | 0.006022428 | protein_coding |
| ENSG00000185504 | FAAP100  | -1.190978751 | 0.004632174 | protein_coding |
| ENSG00000004838 | ZMYND10  | -1.190583855 | 0.047212297 | protein_coding |
| ENSG00000105289 | TJP3     | -1.190583855 | 0.047212297 | protein_coding |
| ENSG00000185800 | DMWD     | -1.190282193 | 0.004997608 | protein_coding |
| ENSG00000185838 | GNB1L    | -1.190068217 | 0.005489694 | protein_coding |
| ENSG00000213533 | STIMATE  | -1.190055613 | 0.037281246 | protein_coding |
| ENSG00000105699 | LSR      | -1.189975615 | 0.006051246 | protein_coding |
| ENSG00000198598 | MMP17    | -1.188142267 | 0.008680636 | protein_coding |
| ENSG00000166189 | HPS6     | -1.187116941 | 0.005786778 | protein_coding |
| ENSG00000090266 | NDUFB2   | -1.185430394 | 0.004817797 | protein_coding |
| ENSG00000174721 | FGFBP3   | -1.184988516 | 0.018736468 | protein_coding |
| ENSG00000177733 | HNRNPA0  | -1.183814894 | 0.004500265 | protein_coding |
| ENSG00000275993 | SIK1B    | -1.183302429 | 0.036582079 | protein_coding |
| ENSG00000167604 | NFKBID   | -1.182932172 | 0.01393897  | protein_coding |
| ENSG00000109089 | CDR2L    | -1.182506723 | 0.005430587 | protein_coding |
| ENSG00000189120 | SP6      | -1.182461283 | 0.045931264 | protein_coding |
| ENSG00000147813 | NAPRT    | -1.1821825   | 0.015857762 | protein_coding |
| ENSG00000213347 | MXD3     | -1.181689957 | 0.005850198 | protein_coding |
| ENSG00000177595 | PIDD1    | -1.181539898 | 0.005297996 | protein_coding |
| ENSG00000128591 | FLNC     | -1.180572495 | 0.004966583 | protein_coding |
| ENSG00000213859 | KCTD11   | -1.17970241  | 0.014839224 | protein_coding |
| ENSG00000186222 | BLOC1S4  | -1.178114186 | 0.005992335 | protein_coding |
| ENSG00000173457 | PPP1R14B | -1.177605569 | 0.004751913 | protein_coding |
| ENSG00000148411 | NACC2    | -1.176704781 | 0.005749299 | protein_coding |
| ENSG00000102981 | PARD6A   | -1.175068034 | 0.044743519 | protein_coding |
| ENSG00000103495 | MAZ      | -1.173892635 | 0.004905849 | protein_coding |
| ENSG00000117410 | ATP6V0B  | -1.17342585  | 0.005050741 | protein_coding |
| ENSG00000055118 | KCNH2    | -1.173202811 | 0.015901775 | protein_coding |
| ENSG00000128268 | MGAT3    | -1.173042604 | 0.006157794 | protein_coding |
| ENSG00000145214 | DGKQ     | -1.170942093 | 0.006021378 | protein_coding |
| ENSG00000160201 | U2AF1    | -1.170500429 | 0.008243672 | protein_coding |
| ENSG00000187140 | FOXD3    | -1.17021658  | 0.012812646 | protein_coding |
| ENSG00000214063 | TSPAN4   | -1.169219273 | 0.00639358  | protein_coding |
| ENSG00000099385 | BCL7C    | -1.168105642 | 0.006079629 | protein_coding |
| ENSG00000167470 | MIDN     | -1.166482313 | 0.005520879 | protein_coding |
| ENSG00000101220 | C20orf27 | -1.164382739 | 0.005307507 | protein_coding |

|                 |          |              |             |                |
|-----------------|----------|--------------|-------------|----------------|
| ENSG00000125740 | FOSB     | -1.160866205 | 0.034165251 | protein_coding |
| ENSG00000177542 | SLC25A22 | -1.160859635 | 0.006128465 | protein_coding |
| ENSG00000204922 | UQCC3    | -1.160467593 | 0.007560008 | protein_coding |
| ENSG00000140320 | BAHD1    | -1.159692366 | 0.006117718 | protein_coding |
| ENSG00000164107 | HAND2    | -1.159357507 | 0.024868925 | protein_coding |
| ENSG00000088727 | KIF9     | -1.15847506  | 0.018507342 | protein_coding |
| ENSG00000125835 | SNRNPB   | -1.155777457 | 0.005508556 | protein_coding |
| ENSG00000162849 | KIF26B   | -1.155681806 | 0.017093035 | protein_coding |
| ENSG00000131094 | C1QL1    | -1.155455595 | 0.011067613 | protein_coding |
| ENSG00000108784 | NAGLU    | -1.155428333 | 0.006300305 | protein_coding |
| ENSG00000020129 | NCDN     | -1.155272517 | 0.005843537 | protein_coding |
| ENSG00000139438 | FAM222A  | -1.154197674 | 0.010119109 | protein_coding |
| ENSG00000108557 | RAI1     | -1.152711842 | 0.006241563 | protein_coding |
| ENSG00000142627 | EPHA2    | -1.152674479 | 0.007952166 | protein_coding |
| ENSG00000273604 | EPOP     | -1.152341238 | 0.007014917 | protein_coding |
| ENSG00000165879 | FRAT1    | -1.152136247 | 0.009490703 | protein_coding |
| ENSG00000100065 | CARD10   | -1.151890213 | 0.00715608  | protein_coding |
| ENSG00000183779 | ZNF703   | -1.151740887 | 0.005665021 | protein_coding |
| ENSG00000140691 | ARMC5    | -1.150689318 | 0.008076974 | protein_coding |
| ENSG00000161179 | YDJC     | -1.148632413 | 0.005924888 | protein_coding |
| ENSG00000130810 | PPAN     | -1.147538018 | 0.011013732 | protein_coding |
| ENSG00000140968 | IRF8     | -1.14665502  | 0.014402495 | protein_coding |
| ENSG00000160877 | NACC1    | -1.145816726 | 0.006129493 | protein_coding |
| ENSG00000184986 | TMEM121  | -1.145055475 | 0.008997218 | protein_coding |
| ENSG00000103066 | PLA2G15  | -1.144861622 | 0.009276308 | protein_coding |
| ENSG00000111671 | SPSB2    | -1.144816208 | 0.020003231 | protein_coding |
| ENSG00000156381 | ANKRD9   | -1.143325051 | 0.006959518 | protein_coding |
| ENSG00000106330 | MOSPD3   | -1.143324915 | 0.010896389 | protein_coding |
| ENSG00000101311 | FERMT1   | -1.142335406 | 0.019947493 | protein_coding |
| ENSG00000187634 | SAMD11   | -1.142159108 | 0.006564423 | protein_coding |
| ENSG00000189366 | ALG1L    | -1.142105185 | 0.027297833 | protein_coding |
| ENSG00000275074 | NUDT18   | -1.141845148 | 0.014462221 | protein_coding |
| ENSG00000144649 | FAM198A  | -1.140881216 | 0.021996589 | protein_coding |
| ENSG00000119715 | ESRRB    | -1.140522976 | 0.017045813 | protein_coding |
| ENSG00000070423 | RNF126   | -1.138449059 | 0.006503478 | protein_coding |
| ENSG00000171159 | C9orf16  | -1.137477369 | 0.007810535 | protein_coding |
| ENSG00000127084 | FGD3     | -1.137454528 | 0.038387234 | protein_coding |
| ENSG00000130702 | LAMA5    | -1.136086056 | 0.006828803 | protein_coding |
| ENSG00000130382 | MLLT1    | -1.135905756 | 0.006620667 | protein_coding |
| ENSG00000188566 | NDOR1    | -1.134489078 | 0.007681472 | protein_coding |
| ENSG00000176170 | SPHK1    | -1.134357825 | 0.00942682  | protein_coding |
| ENSG00000109736 | MFSD10   | -1.132370595 | 0.007195771 | protein_coding |
| ENSG00000104880 | ARHGEF18 | -1.131254482 | 0.01968691  | protein_coding |

|                 |            |              |             |                |
|-----------------|------------|--------------|-------------|----------------|
| ENSG00000130208 | APOC1      | -1.131050054 | 0.010024373 | protein_coding |
| ENSG00000063660 | GPC1       | -1.130252003 | 0.007591794 | protein_coding |
| ENSG00000148343 | MIGA2      | -1.13018627  | 0.007622649 | protein_coding |
| ENSG00000120738 | EGR1       | -1.129807786 | 0.012437341 | protein_coding |
| ENSG00000107816 | LZTS2      | -1.128103601 | 0.007368029 | protein_coding |
| ENSG00000050820 | BCAR1      | -1.127532291 | 0.00744024  | protein_coding |
| ENSG00000169635 | HIC2       | -1.127076103 | 0.007242824 | protein_coding |
| ENSG00000170906 | NDUFA3     | -1.125416218 | 0.007754895 | protein_coding |
| ENSG00000167775 | CD320      | -1.124428502 | 0.007207943 | protein_coding |
| ENSG00000184058 | TBX1       | -1.122401514 | 0.007387855 | protein_coding |
| ENSG00000180447 | GAS1       | -1.12221183  | 0.008390892 | protein_coding |
| ENSG00000107859 | PITX3      | -1.120752969 | 0.045117399 | protein_coding |
| ENSG00000072195 | SPEG       | -1.120252218 | 0.008869534 | protein_coding |
| ENSG00000159714 | ZDHHC1     | -1.120124828 | 0.011481661 | protein_coding |
| ENSG00000159314 | ARHGAP27   | -1.118121291 | 0.013506089 | protein_coding |
| ENSG00000175040 | CHST2      | -1.117643124 | 0.010469837 | protein_coding |
| ENSG00000141570 | CBX8       | -1.114609987 | 0.010011362 | protein_coding |
| ENSG00000180900 | SCRIB      | -1.114600919 | 0.007459868 | protein_coding |
| ENSG00000166595 | CIAO2B     | -1.114272363 | 0.008108398 | protein_coding |
| ENSG00000100263 | RHBDD3     | -1.114168952 | 0.008162588 | protein_coding |
| ENSG00000099617 | EFNA2      | -1.113656658 | 0.043119316 | protein_coding |
| ENSG00000103335 | PIEZO1     | -1.113309789 | 0.00769284  | protein_coding |
| ENSG00000284976 | BX255925.3 | -1.111597019 | 0.009071626 | protein_coding |
| ENSG00000138835 | RGS3       | -1.110462594 | 0.042214057 | protein_coding |
| ENSG00000142327 | RNPEPL1    | -1.110461846 | 0.00906644  | protein_coding |
| ENSG00000104960 | PTOV1      | -1.109461993 | 0.00793785  | protein_coding |
| ENSG00000144589 | STK11IP    | -1.109074665 | 0.009380459 | protein_coding |
| ENSG00000158106 | RHPN1      | -1.107521893 | 0.009681928 | protein_coding |
| ENSG00000099814 | CEP170B    | -1.107227887 | 0.008310346 | protein_coding |
| ENSG00000107404 | DVL1       | -1.107087227 | 0.008091372 | protein_coding |
| ENSG00000102109 | PCSK1N     | -1.106428561 | 0.008602489 | protein_coding |
| ENSG00000162073 | PAQR4      | -1.106410557 | 0.009631756 | protein_coding |
| ENSG00000064545 | TMEM161A   | -1.105914562 | 0.008211469 | protein_coding |
| ENSG00000214706 | IFRD2      | -1.104117571 | 0.008160716 | protein_coding |
| ENSG00000142409 | ZNF787     | -1.10282476  | 0.008882003 | protein_coding |
| ENSG00000123146 | ADGRE5     | -1.102183412 | 0.01167373  | protein_coding |
| ENSG00000124507 | PACSIN1    | -1.102039655 | 0.039811039 | protein_coding |
| ENSG00000142798 | HSPG2      | -1.101225772 | 0.012165774 | protein_coding |
| ENSG00000141933 | TPGS1      | -1.099941131 | 0.012838679 | protein_coding |
| ENSG00000163870 | TPRA1      | -1.099718105 | 0.009243396 | protein_coding |
| ENSG00000068001 | HYAL2      | -1.096937865 | 0.010198881 | protein_coding |
| ENSG00000006062 | MAP3K14    | -1.094074623 | 0.021834404 | protein_coding |
| ENSG00000251322 | SHANK3     | -1.093918743 | 0.009369883 | protein_coding |

|                 |          |              |             |                |
|-----------------|----------|--------------|-------------|----------------|
| ENSG00000197119 | SLC25A29 | -1.093832527 | 0.012288879 | protein_coding |
| ENSG00000136830 | FAM129B  | -1.093638255 | 0.008975579 | protein_coding |
| ENSG00000163794 | UCN      | -1.092930008 | 0.037190124 | protein_coding |
| ENSG00000205476 | CCDC85C  | -1.091656589 | 0.009288847 | protein_coding |
| ENSG00000203772 | SPRN     | -1.087528242 | 0.023682354 | protein_coding |
| ENSG00000105520 | PLPPR2   | -1.087174573 | 0.01017802  | protein_coding |
| ENSG00000168273 | SMIM4    | -1.086550634 | 0.01327429  | protein_coding |
| ENSG00000181790 | ADGRB1   | -1.086507865 | 0.015474095 | protein_coding |
| ENSG00000115844 | DLX2     | -1.086119602 | 0.009642413 | protein_coding |
| ENSG00000185522 | LMNTD2   | -1.085594891 | 0.0350671   | protein_coding |
| ENSG00000148824 | MTG1     | -1.085535132 | 0.014475445 | protein_coding |
| ENSG00000078900 | TP73     | -1.085102696 | 0.013120503 | protein_coding |
| ENSG00000006118 | TMEM132A | -1.08450056  | 0.009533045 | protein_coding |
| ENSG00000184470 | TXNRD2   | -1.084282873 | 0.009935738 | protein_coding |
| ENSG00000127561 | SYNGR3   | -1.084228327 | 0.023339508 | protein_coding |
| ENSG00000125503 | PPP1R12C | -1.083919286 | 0.009637029 | protein_coding |
| ENSG00000164362 | TERT     | -1.083495075 | 0.013601213 | protein_coding |
| ENSG00000179403 | VWA1     | -1.083005369 | 0.013391952 | protein_coding |
| ENSG00000167703 | SLC43A2  | -1.082448403 | 0.014536118 | protein_coding |
| ENSG00000122490 | PQLC1    | -1.08166423  | 0.010543425 | protein_coding |
| ENSG00000212864 | RNF208   | -1.079995165 | 0.025927384 | protein_coding |
| ENSG00000112667 | DNPH1    | -1.07998811  | 0.009658496 | protein_coding |
| ENSG00000197858 | GPAA1    | -1.076603676 | 0.00995706  | protein_coding |
| ENSG00000006638 | TBXA2R   | -1.075422307 | 0.041706837 | protein_coding |
| ENSG00000115649 | CNPPD1   | -1.074930779 | 0.011560094 | protein_coding |
| ENSG00000177700 | POLR2L   | -1.07292361  | 0.010246408 | protein_coding |
| ENSG00000176022 | B3GALT6  | -1.072579955 | 0.011081681 | protein_coding |
| ENSG00000235034 | C19orf81 | -1.07220402  | 0.022061377 | protein_coding |
| ENSG00000011105 | TSPAN9   | -1.071643551 | 0.013202403 | protein_coding |
| ENSG00000130762 | ARHGEF16 | -1.071587149 | 0.018465063 | protein_coding |
| ENSG00000169991 | IFFO2    | -1.070771905 | 0.014763849 | protein_coding |
| ENSG00000167925 | GHDC     | -1.068787274 | 0.012678429 | protein_coding |
| ENSG00000197696 | NMB      | -1.068557268 | 0.014806683 | protein_coding |
| ENSG00000161395 | PGAP3    | -1.067295435 | 0.015165069 | protein_coding |
| ENSG00000103253 | HAGHL    | -1.067246696 | 0.014312481 | protein_coding |
| ENSG00000107819 | SFXN3    | -1.066390618 | 0.01457207  | protein_coding |
| ENSG00000100299 | ARSA     | -1.0654519   | 0.012507969 | protein_coding |
| ENSG00000166823 | MESP1    | -1.065423217 | 0.019443105 | protein_coding |
| ENSG00000197114 | ZGPAT    | -1.063646661 | 0.023354046 | protein_coding |
| ENSG00000169710 | FASN     | -1.062512587 | 0.010471664 | protein_coding |
| ENSG00000099875 | MKNK2    | -1.059814226 | 0.011045592 | protein_coding |
| ENSG00000213420 | GPC2     | -1.059179295 | 0.031516168 | protein_coding |
| ENSG00000177519 | RPRM     | -1.059050659 | 0.049131109 | protein_coding |

|                 |          |              |             |                |
|-----------------|----------|--------------|-------------|----------------|
| ENSG00000183655 | KLHL25   | -1.057258888 | 0.015630023 | protein_coding |
| ENSG00000030110 | BAK1     | -1.057245671 | 0.012260039 | protein_coding |
| ENSG00000114395 | CYB561D2 | -1.056383151 | 0.017200456 | protein_coding |
| ENSG00000186666 | BCDIN3D  | -1.056353554 | 0.025128849 | protein_coding |
| ENSG00000198355 | PIM3     | -1.056151808 | 0.011260876 | protein_coding |
| ENSG00000185909 | KLHDC8B  | -1.056080817 | 0.016034731 | protein_coding |
| ENSG00000135424 | ITGA7    | -1.055440394 | 0.01652734  | protein_coding |
| ENSG00000100445 | SDR39U1  | -1.055399072 | 0.016032055 | protein_coding |
| ENSG00000188486 | H2AFX    | -1.054475596 | 0.011328536 | protein_coding |
| ENSG00000204580 | DDR1     | -1.054314437 | 0.013202044 | protein_coding |
| ENSG00000164403 | SHROOM1  | -1.054014525 | 0.015647243 | protein_coding |
| ENSG00000167799 | NUDT8    | -1.053310377 | 0.017104255 | protein_coding |
| ENSG00000106009 | BRAT1    | -1.052897265 | 0.011687749 | protein_coding |
| ENSG00000070404 | FSTL3    | -1.052052399 | 0.021840876 | protein_coding |
| ENSG00000244165 | P2RY11   | -1.051947982 | 0.019800385 | protein_coding |
| ENSG00000170684 | ZNF296   | -1.049314732 | 0.021381169 | protein_coding |
| ENSG00000179627 | ZBTB42   | -1.049075174 | 0.027592909 | protein_coding |
| ENSG00000171858 | RPS21    | -1.048839689 | 0.011671488 | protein_coding |
| ENSG00000160963 | COL26A1  | -1.04861446  | 0.019432215 | protein_coding |
| ENSG00000061656 | SPAG4    | -1.04859108  | 0.036686451 | protein_coding |
| ENSG00000130332 | LSM7     | -1.048518675 | 0.011965783 | protein_coding |
| ENSG00000130821 | SLC6A8   | -1.047844192 | 0.011804023 | protein_coding |
| ENSG00000177283 | FZD8     | -1.046259859 | 0.015669297 | protein_coding |
| ENSG00000224940 | PRRT4    | -1.045921523 | 0.017526681 | protein_coding |
| ENSG00000183479 | TREX2    | -1.045402315 | 0.034402898 | protein_coding |
| ENSG00000110628 | SLC22A18 | -1.045402315 | 0.034402898 | protein_coding |
| ENSG00000152669 | CCNO     | -1.045290291 | 0.026127706 | protein_coding |
| ENSG00000083807 | SLC27A5  | -1.044925202 | 0.025986633 | protein_coding |
| ENSG00000169258 | GPRIN1   | -1.044609865 | 0.013013139 | protein_coding |
| ENSG00000185340 | GAS2L1   | -1.044569456 | 0.01835622  | protein_coding |
| ENSG00000160959 | LRRC14   | -1.044373292 | 0.013480286 | protein_coding |
| ENSG00000176182 | MYPOP    | -1.044252973 | 0.015995594 | protein_coding |
| ENSG00000131409 | LRRC4B   | -1.043657156 | 0.017398061 | protein_coding |
| ENSG00000155034 | FBXL18   | -1.043641946 | 0.015991852 | protein_coding |
| ENSG00000115457 | IGFBP2   | -1.043502869 | 0.012791772 | protein_coding |
| ENSG00000254858 | MPV17L2  | -1.043421244 | 0.014124514 | protein_coding |
| ENSG00000125912 | NCLN     | -1.043387974 | 0.012154716 | protein_coding |
| ENSG00000137409 | MTCH1    | -1.04300886  | 0.012224782 | protein_coding |
| ENSG00000161513 | FDXR     | -1.042963196 | 0.014151678 | protein_coding |
| ENSG00000079313 | REXO1    | -1.040572172 | 0.013349203 | protein_coding |
| ENSG00000247596 | TWF2     | -1.038500092 | 0.014170767 | protein_coding |
| ENSG00000126464 | PRR12    | -1.038410419 | 0.01353717  | protein_coding |
| ENSG00000099364 | FBXL19   | -1.037516877 | 0.012776929 | protein_coding |

|                 |             |              |             |                |
|-----------------|-------------|--------------|-------------|----------------|
| ENSG00000275183 | LENG9       | -1.037296299 | 0.028677061 | protein_coding |
| ENSG00000171119 | NRTN        | -1.037180584 | 0.021301892 | protein_coding |
| ENSG00000178252 | WDR6        | -1.036767031 | 0.012672682 | protein_coding |
| ENSG00000074071 | MRPS34      | -1.035440619 | 0.012780927 | protein_coding |
| ENSG00000075399 | VPS9D1      | -1.035413536 | 0.017519473 | protein_coding |
| ENSG00000224420 | ADM5        | -1.034923812 | 0.049644069 | protein_coding |
| ENSG00000135454 | B4GALNT1    | -1.034730982 | 0.018352883 | protein_coding |
| ENSG00000168890 | TMEM150A    | -1.034363879 | 0.024191052 | protein_coding |
| ENSG00000136840 | ST6GALNAC4  | -1.034300578 | 0.015294333 | protein_coding |
| ENSG00000107140 | TESK1       | -1.033200688 | 0.018129142 | protein_coding |
| ENSG00000004777 | ARHGAP33    | -1.031883086 | 0.022930178 | protein_coding |
| ENSG00000153976 | HS3ST3A1    | -1.031563586 | 0.017887715 | protein_coding |
| ENSG00000188070 | C11orf95    | -1.031311267 | 0.01419527  | protein_coding |
| ENSG00000100968 | NFATC4      | -1.029685362 | 0.015713248 | protein_coding |
| ENSG00000171813 | PWWP2B      | -1.029591234 | 0.01867871  | protein_coding |
| ENSG00000164167 | LSM6        | -1.028752577 | 0.018477718 | protein_coding |
| ENSG00000079999 | KEAP1       | -1.02801019  | 0.013882969 | protein_coding |
| ENSG00000071655 | MBD3        | -1.027590555 | 0.013656087 | protein_coding |
| ENSG00000269113 | TRABD2B     | -1.025848157 | 0.02872419  | protein_coding |
| ENSG00000118046 | STK11       | -1.025714462 | 0.013790837 | protein_coding |
| ENSG00000166016 | ABTB2       | -1.025253184 | 0.01677698  | protein_coding |
| ENSG00000160072 | ATAD3B      | -1.025016335 | 0.014189747 | protein_coding |
| ENSG00000095596 | CYP26A1     | -1.024003486 | 0.02362233  | protein_coding |
| ENSG00000140983 | RHOT2       | -1.023998126 | 0.014011891 | protein_coding |
| ENSG00000188747 | NOXA1       | -1.023013114 | 0.022365683 | protein_coding |
| ENSG00000280071 | GATD3B      | -1.023013114 | 0.022365683 | protein_coding |
| ENSG00000185085 | INTS5       | -1.02184121  | 0.015580902 | protein_coding |
| ENSG00000198816 | ZNF358      | -1.021615551 | 0.016583931 | protein_coding |
| ENSG00000076826 | CAMSAP3     | -1.019698204 | 0.016932778 | protein_coding |
| ENSG00000187961 | KLHL17      | -1.019065028 | 0.01606264  | protein_coding |
| ENSG00000153443 | UBALD1      | -1.017439117 | 0.015861772 | protein_coding |
| ENSG00000076351 | SLC46A1     | -1.017106112 | 0.019845673 | protein_coding |
| ENSG00000105516 | DBP         | -1.017039197 | 0.020413161 | protein_coding |
| ENSG00000134072 | CAMK1       | -1.016942058 | 0.021241841 | protein_coding |
| ENSG00000136352 | NKX2-1      | -1.016646668 | 0.02484791  | protein_coding |
| ENSG00000100258 | LMF2        | -1.016299085 | 0.014928976 | protein_coding |
| ENSG00000156453 | PCDH1       | -1.016169614 | 0.033356057 | protein_coding |
| ENSG00000166289 | PLEKHF1     | -1.016099268 | 0.034333329 | protein_coding |
| ENSG00000283154 | IQCJ-SCHIP1 | -1.016048403 | 0.035045218 | protein_coding |
| ENSG00000182749 | PAQR7       | -1.016021657 | 0.035421272 | protein_coding |
| ENSG00000187479 | C11orf96    | -1.015367818 | 0.049024715 | protein_coding |
| ENSG00000103152 | MPG         | -1.015250925 | 0.017226587 | protein_coding |
| ENSG00000160285 | LSS         | -1.014158794 | 0.015072296 | protein_coding |



|                 |          |              |             |                |
|-----------------|----------|--------------|-------------|----------------|
| ENSG00000008441 | NFIX     | -1.013996594 | 0.016592381 | protein_coding |
| ENSG00000166886 | NAB2     | -1.013985595 | 0.019102624 | protein_coding |
| ENSG00000164880 | INTS1    | -1.013575006 | 0.014707962 | protein_coding |
| ENSG00000127399 | LRRC61   | -1.013070156 | 0.017489674 | protein_coding |
| ENSG00000161091 | MFSD12   | -1.012122457 | 0.015738784 | protein_coding |
| ENSG00000171222 | SCAND1   | -1.01126733  | 0.016238236 | protein_coding |
| ENSG00000187051 | RPS19BP1 | -1.010929883 | 0.015375822 | protein_coding |
| ENSG00000177697 | CD151    | -1.009337618 | 0.015530114 | protein_coding |
| ENSG00000007264 | MATK     | -1.009192098 | 0.016374912 | protein_coding |
| ENSG00000189319 | FAM53B   | -1.009112035 | 0.016880043 | protein_coding |
| ENSG00000140859 | KIFC3    | -1.008863161 | 0.021086073 | protein_coding |
| ENSG00000168101 | NUDT16L1 | -1.008242618 | 0.018106369 | protein_coding |
| ENSG00000101199 | ARFGAP1  | -1.006827511 | 0.015676531 | protein_coding |
| ENSG00000162062 | TEDC2    | -1.00674735  | 0.016981717 | protein_coding |
| ENSG00000126106 | TMEM53   | -1.00579038  | 0.033808665 | protein_coding |
| ENSG00000095906 | NUBP2    | -1.005594418 | 0.015873931 | protein_coding |
| ENSG00000139546 | TARBP2   | -1.004799129 | 0.01691636  | protein_coding |
| ENSG00000184207 | PGP      | -1.004262785 | 0.016253828 | protein_coding |
| ENSG00000099904 | ZDHHC8   | -1.003773648 | 0.016394883 | protein_coding |
| ENSG00000104964 | AES      | -1.003528004 | 0.016383561 | protein_coding |
| ENSG00000184489 | PTP4A3   | -1.001070576 | 0.02197215  | protein_coding |
| ENSG00000075618 | FSCN1    | -1.000467282 | 0.016182601 | protein_coding |
| ENSG00000064225 | ST3GAL6  | 1.002125332  | 0.021513207 | protein_coding |
| ENSG00000176209 | SMIM19   | 1.002820603  | 0.020662192 | protein_coding |
| ENSG00000106052 | TAX1BP1  | 1.003350983  | 0.016357959 | protein_coding |
| ENSG00000113387 | SUB1     | 1.003679111  | 0.015781879 | protein_coding |
| ENSG00000120860 | WASHC3   | 1.005956237  | 0.022717051 | protein_coding |
| ENSG00000256294 | ZNF225   | 1.008146465  | 0.038011217 | protein_coding |
| ENSG00000163634 | THOC7    | 1.010125488  | 0.015825052 | protein_coding |
| ENSG00000003436 | TFPI     | 1.010851687  | 0.040725658 | protein_coding |
| ENSG00000197603 | CPLANE1  | 1.011476041  | 0.018533563 | protein_coding |
| ENSG00000139117 | CPNE8    | 1.012555754  | 0.019312824 | protein_coding |
| ENSG00000147118 | ZNF182   | 1.012988896  | 0.022602575 | protein_coding |
| ENSG00000151422 | FER      | 1.019438059  | 0.018534001 | protein_coding |
| ENSG00000173230 | GOLGB1   | 1.020508188  | 0.014545221 | protein_coding |
| ENSG00000123595 | RAB9A    | 1.021980013  | 0.015581262 | protein_coding |
| ENSG00000166200 | COPS2    | 1.022981504  | 0.014545666 | protein_coding |
| ENSG00000082146 | STRADB   | 1.025456938  | 0.014679274 | protein_coding |
| ENSG00000116030 | SUMO1    | 1.025978179  | 0.013825109 | protein_coding |
| ENSG00000116044 | NFE2L2   | 1.028844384  | 0.014570899 | protein_coding |
| ENSG00000180574 | EIF2S3B  | 1.030030917  | 0.019682578 | protein_coding |
| ENSG00000205571 | SMN2     | 1.030777412  | 0.016989336 | protein_coding |
| ENSG00000140905 | GCSH     | 1.032836103  | 0.016631176 | protein_coding |

|                 |          |             |             |                |
|-----------------|----------|-------------|-------------|----------------|
| ENSG00000274276 | CBSL     | 1.037709075 | 0.013856152 | protein_coding |
| ENSG00000153132 | CLGN     | 1.039931376 | 0.016370148 | protein_coding |
| ENSG00000087502 | ERGIC2   | 1.044495053 | 0.013815891 | protein_coding |
| ENSG00000162994 | CLHC1    | 1.045838437 | 0.036686451 | protein_coding |
| ENSG00000132357 | CARD6    | 1.047311088 | 0.037209159 | protein_coding |
| ENSG00000152404 | CWF19L2  | 1.047925114 | 0.015657741 | protein_coding |
| ENSG00000130021 | PUDP     | 1.048266881 | 0.01897787  | protein_coding |
| ENSG00000206530 | CFAP44   | 1.048630489 | 0.020379833 | protein_coding |
| ENSG00000031691 | CENPQ    | 1.051554678 | 0.018284874 | protein_coding |
| ENSG00000117262 | GPR89A   | 1.051717846 | 0.016984613 | protein_coding |
| ENSG00000118292 | C1orf54  | 1.05217005  | 0.035558915 | protein_coding |
| ENSG00000104412 | EMC2     | 1.053344992 | 0.013502186 | protein_coding |
| ENSG00000174720 | LARP7    | 1.057243709 | 0.01234026  | protein_coding |
| ENSG00000274419 | TBC1D3D  | 1.058331384 | 0.032924312 | protein_coding |
| ENSG00000159256 | MORC3    | 1.063368935 | 0.013650699 | protein_coding |
| ENSG00000138433 | CIR1     | 1.064968766 | 0.013574352 | protein_coding |
| ENSG00000083535 | PIBF1    | 1.06547327  | 0.012166632 | protein_coding |
| ENSG00000153975 | ZUP1     | 1.070118607 | 0.012501753 | protein_coding |
| ENSG00000164221 | CCDC112  | 1.072420204 | 0.014410862 | protein_coding |
| ENSG00000276180 | HIST1H4I | 1.075221917 | 0.013772335 | protein_coding |
| ENSG00000087495 | PHACTR3  | 1.075439238 | 0.023682354 | protein_coding |
| ENSG00000141642 | ELAC1    | 1.075452996 | 0.019938131 | protein_coding |
| ENSG00000133112 | TPT1     | 1.076357444 | 0.009524794 | protein_coding |
| ENSG00000151743 | AMN1     | 1.077503532 | 0.030996237 | protein_coding |
| ENSG00000163029 | SMC6     | 1.084765552 | 0.009880827 | protein_coding |
| ENSG00000240344 | PPIL3    | 1.089349603 | 0.011595878 | protein_coding |
| ENSG00000135205 | CCDC146  | 1.089633458 | 0.046223025 | protein_coding |
| ENSG00000151366 | NDUFC2   | 1.093508997 | 0.009705878 | protein_coding |
| ENSG00000135968 | GCC2     | 1.093550485 | 0.009524648 | protein_coding |
| ENSG00000127914 | AKAP9    | 1.093930072 | 0.009651232 | protein_coding |
| ENSG00000133710 | SPINK5   | 1.095889298 | 0.025248005 | protein_coding |
| ENSG00000175354 | PTPN2    | 1.096067149 | 0.01078456  | protein_coding |
| ENSG00000129534 | MIS18BP1 | 1.09900599  | 0.009317663 | protein_coding |
| ENSG00000198839 | ZNF277   | 1.100440522 | 0.010736504 | protein_coding |
| ENSG00000095261 | PSMD5    | 1.100872242 | 0.014420139 | protein_coding |
| ENSG00000137821 | LRRC49   | 1.109735173 | 0.013357164 | protein_coding |
| ENSG00000166896 | ATP23    | 1.111968492 | 0.014749201 | protein_coding |
| ENSG00000166192 | SENP8    | 1.116904189 | 0.015229158 | protein_coding |
| ENSG00000107890 | ANKRD26  | 1.122639199 | 0.010594506 | protein_coding |
| ENSG00000153140 | CETN3    | 1.128302951 | 0.00879816  | protein_coding |
| ENSG00000096872 | IFT74    | 1.129492403 | 0.009787573 | protein_coding |
| ENSG00000139618 | BRCA2    | 1.129622886 | 0.007593524 | protein_coding |
| ENSG00000174718 | KIAA1551 | 1.130030204 | 0.009642512 | protein_coding |

|                 |            |             |             |                |
|-----------------|------------|-------------|-------------|----------------|
| ENSG00000147687 | TATDN1     | 1.130363564 | 0.009112864 | protein_coding |
| ENSG00000137500 | CCDC90B    | 1.131408886 | 0.008237673 | protein_coding |
| ENSG00000140386 | SCAPER     | 1.141533345 | 0.008745638 | protein_coding |
| ENSG00000122008 | POLK       | 1.142182591 | 0.008466081 | protein_coding |
| ENSG00000135336 | ORC3       | 1.145042464 | 0.006804293 | protein_coding |
| ENSG00000131013 | PPIL4      | 1.145316217 | 0.006476972 | protein_coding |
| ENSG00000130649 | CYP2E1     | 1.148341896 | 0.014188412 | protein_coding |
| ENSG00000168679 | SLC16A4    | 1.149590822 | 0.022901013 | protein_coding |
| ENSG00000020426 | MNAT1      | 1.15294259  | 0.006762291 | protein_coding |
| ENSG00000224578 | HNRNPA1P48 | 1.152971568 | 0.006861736 | protein_coding |
| ENSG00000164162 | ANAPC10    | 1.153366035 | 0.014959466 | protein_coding |
| ENSG00000137831 | UACA       | 1.153851622 | 0.006121945 | protein_coding |
| ENSG00000169621 | APLF       | 1.154078416 | 0.023030426 | protein_coding |
| ENSG00000090612 | ZNF268     | 1.154884185 | 0.008756328 | protein_coding |
| ENSG00000143971 | ETAA1      | 1.165146822 | 0.006804991 | protein_coding |
| ENSG00000170860 | LSM3       | 1.169165152 | 0.005168978 | protein_coding |
| ENSG00000106013 | ANKRD7     | 1.170307959 | 0.038817849 | protein_coding |
| ENSG00000056277 | ZNF280C    | 1.172446482 | 0.005507475 | protein_coding |
| ENSG00000100629 | CEP128     | 1.17393847  | 0.007140174 | protein_coding |
| ENSG00000117477 | CCDC181    | 1.174364008 | 0.007733495 | protein_coding |
| ENSG00000101871 | MID1       | 1.176854681 | 0.00497534  | protein_coding |
| ENSG00000198707 | CEP290     | 1.180101605 | 0.005483223 | protein_coding |
| ENSG00000133640 | LRRIQ1     | 1.182403675 | 0.032606579 | protein_coding |
| ENSG00000176204 | LRRTM4     | 1.18627475  | 0.018765093 | protein_coding |
| ENSG00000118514 | ALDH8A1    | 1.190820547 | 0.033121091 | protein_coding |
| ENSG00000233087 | RAB6D      | 1.192495751 | 0.027887688 | protein_coding |
| ENSG00000196172 | ZNF681     | 1.192495751 | 0.027887688 | protein_coding |
| ENSG00000111832 | RWDD1      | 1.193649445 | 0.004442718 | protein_coding |
| ENSG00000109063 | MYH3       | 1.193848379 | 0.014618718 | protein_coding |
| ENSG00000188452 | CERKL      | 1.198364955 | 0.009728465 | protein_coding |
| ENSG00000180336 | MEIOC      | 1.199180327 | 0.041535125 | protein_coding |
| ENSG00000151490 | PTPRO      | 1.199180327 | 0.041535125 | protein_coding |
| ENSG00000164414 | SLC35A1    | 1.203321443 | 0.009547575 | protein_coding |
| ENSG00000152422 | XRCC4      | 1.207985909 | 0.007816474 | protein_coding |
| ENSG00000196873 | CBWD3      | 1.208568834 | 0.008913313 | protein_coding |
| ENSG00000185829 | ARL17A     | 1.208787203 | 0.006610262 | protein_coding |
| ENSG00000138311 | ZNF365     | 1.217104898 | 0.024563218 | protein_coding |
| ENSG00000251192 | ZNF674     | 1.217613777 | 0.010563916 | protein_coding |
| ENSG00000166750 | SLFN5      | 1.220443385 | 0.008238935 | protein_coding |
| ENSG00000241399 | CD302      | 1.221545742 | 0.010492033 | protein_coding |
| ENSG00000152932 | RAB3C      | 1.228491768 | 0.009862954 | protein_coding |
| ENSG00000100815 | TRIP11     | 1.230248253 | 0.003908673 | protein_coding |
| ENSG00000165169 | DYNLT3     | 1.231338491 | 0.004195302 | protein_coding |

|                 |            |             |             |                |
|-----------------|------------|-------------|-------------|----------------|
| ENSG00000179021 | C3orf38    | 1.236465113 | 0.004078934 | protein_coding |
| ENSG00000196912 | ANKRD36B   | 1.238707351 | 0.006940806 | protein_coding |
| ENSG00000165512 | ZNF22      | 1.245860873 | 0.003597623 | protein_coding |
| ENSG00000205707 | ETFRF1     | 1.246745553 | 0.00570038  | protein_coding |
| ENSG00000134198 | TSPAN2     | 1.251908257 | 0.008196656 | protein_coding |
| ENSG00000084453 | SLCO1A2    | 1.25256836  | 0.029914245 | protein_coding |
| ENSG00000166352 | C11orf74   | 1.252686533 | 0.00405002  | protein_coding |
| ENSG00000171817 | ZNF540     | 1.255086126 | 0.046163285 | protein_coding |
| ENSG00000138380 | CARF       | 1.260376354 | 0.009278173 | protein_coding |
| ENSG00000147041 | SYTL5      | 1.260848891 | 0.007128095 | protein_coding |
| ENSG00000168944 | CEP120     | 1.261343538 | 0.003245518 | protein_coding |
| ENSG00000176971 | FIBIN      | 1.265098571 | 0.019047235 | protein_coding |
| ENSG00000173210 | ABLIM3     | 1.266098735 | 0.030298791 | protein_coding |
| ENSG00000146757 | ZNF92      | 1.266330762 | 0.003803657 | protein_coding |
| ENSG00000163141 | BNIP1      | 1.27389492  | 0.04754413  | protein_coding |
| ENSG00000166669 | ATF7IP2    | 1.274114308 | 0.005833977 | protein_coding |
| ENSG00000180479 | ZNF571     | 1.286278989 | 0.010719151 | protein_coding |
| ENSG00000204869 | IGFL4      | 1.296754387 | 0.038410682 | protein_coding |
| ENSG00000158055 | GRHL3      | 1.297695698 | 0.031103696 | protein_coding |
| ENSG00000001561 | ENPP4      | 1.299573999 | 0.003228083 | protein_coding |
| ENSG00000113396 | SLC27A6    | 1.301001795 | 0.01112167  | protein_coding |
| ENSG00000152582 | SPEF2      | 1.301791612 | 0.008570113 | protein_coding |
| ENSG00000129991 | TNNI3      | 1.302107826 | 0.007273056 | protein_coding |
| ENSG00000163319 | MRPS18C    | 1.316048883 | 0.002076061 | protein_coding |
| ENSG00000072201 | LNX1       | 1.31630161  | 0.031520396 | protein_coding |
| ENSG00000176046 | NUPR1      | 1.332235601 | 0.004030262 | protein_coding |
| ENSG00000243696 | AC006254.1 | 1.337252882 | 0.031942348 | protein_coding |
| ENSG00000143248 | RGS5       | 1.342385654 | 0.006611351 | protein_coding |
| ENSG00000135315 | CEP162     | 1.343408101 | 0.002637051 | protein_coding |
| ENSG00000172086 | KRCC1      | 1.348902817 | 0.003337939 | protein_coding |
| ENSG00000175197 | DDIT3      | 1.355731974 | 0.003676385 | protein_coding |
| ENSG00000115594 | IL1R1      | 1.360993488 | 0.018835279 | protein_coding |
| ENSG00000172159 | FRMD3      | 1.372547878 | 0.016215654 | protein_coding |
| ENSG00000147082 | CCNB3      | 1.378530467 | 0.0100741   | protein_coding |
| ENSG00000169627 | BOLA2B     | 1.384772588 | 0.011094044 | protein_coding |
| ENSG00000101132 | PFDN4      | 1.388824901 | 0.001042569 | protein_coding |
| ENSG00000223658 | C1GALT1C1L | 1.391286925 | 0.01607015  | protein_coding |
| ENSG00000188611 | ASAH2      | 1.409284709 | 0.005307868 | protein_coding |
| ENSG00000168491 | CCDC110    | 1.414991035 | 0.022064739 | protein_coding |
| ENSG00000183137 | CEP57L1    | 1.415623661 | 0.001179573 | protein_coding |
| ENSG00000187554 | TLR5       | 1.443789307 | 0.042814164 | protein_coding |
| ENSG00000133739 | LRRCC1     | 1.448803431 | 0.001226946 | protein_coding |
| ENSG00000219626 | FAM228B    | 1.450029804 | 0.011696955 | protein_coding |

|                 |           |             |             |                |
|-----------------|-----------|-------------|-------------|----------------|
| ENSG00000175564 | UCP3      | 1.450029804 | 0.011696955 | protein_coding |
| ENSG00000197580 | BCO2      | 1.456476784 | 0.033533086 | protein_coding |
| ENSG00000089199 | CHGB      | 1.456476784 | 0.033533086 | protein_coding |
| ENSG00000070081 | NUCB2     | 1.458130072 | 0.000625575 | protein_coding |
| ENSG00000170542 | SERPINB9  | 1.462126846 | 0.009030878 | protein_coding |
| ENSG00000109452 | INPP4B    | 1.473167477 | 0.011440165 | protein_coding |
| ENSG00000118557 | PMFBP1    | 1.475365094 | 0.021872151 | protein_coding |
| ENSG00000185267 | CDNF      | 1.506474109 | 0.008515683 | protein_coding |
| ENSG00000163666 | HESX1     | 1.517033355 | 0.017860441 | protein_coding |
| ENSG00000197405 | C5AR1     | 1.517033355 | 0.017860441 | protein_coding |
| ENSG00000145700 | ANKRD31   | 1.527156627 | 0.010850785 | protein_coding |
| ENSG00000240038 | AMY2B     | 1.533889169 | 0.007267388 | protein_coding |
| ENSG00000106686 | SPATA6L   | 1.53565874  | 0.006465915 | protein_coding |
| ENSG00000086717 | PPEF1     | 1.550593732 | 0.044489089 | protein_coding |
| ENSG00000196267 | ZNF836    | 1.552668053 | 0.034035355 | protein_coding |
| ENSG00000060140 | STYK1     | 1.556645043 | 0.017539069 | protein_coding |
| ENSG00000129204 | USP6      | 1.591108179 | 0.007606008 | protein_coding |
| ENSG00000198075 | SULT1C4   | 1.605645375 | 0.001503329 | protein_coding |
| ENSG00000182459 | TEX19     | 1.625312966 | 0.045117465 | protein_coding |
| ENSG00000118307 | CASC1     | 1.625312966 | 0.045117465 | protein_coding |
| ENSG00000118997 | DNAH7     | 1.625312966 | 0.045117465 | protein_coding |
| ENSG00000164989 | CCDC171   | 1.627404741 | 0.000784384 | protein_coding |
| ENSG00000197279 | ZNF165    | 1.631692615 | 0.003215074 | protein_coding |
| ENSG00000128052 | KDR       | 1.681091252 | 0.026105331 | protein_coding |
| ENSG00000135346 | CGA       | 1.681091252 | 0.026105331 | protein_coding |
| ENSG00000170006 | TMEM154   | 1.698839143 | 0.033910222 | protein_coding |
| ENSG00000267508 | ZNF285    | 1.698839143 | 0.033910222 | protein_coding |
| ENSG00000075673 | ATP12A    | 1.705619684 | 0.013149317 | protein_coding |
| ENSG00000122477 | LRRC39    | 1.713443113 | 0.00168007  | protein_coding |
| ENSG00000188738 | FSIP2     | 1.720204879 | 0.001306375 | protein_coding |
| ENSG00000129749 | CHRNA10   | 1.721112036 | 0.007498916 | protein_coding |
| ENSG00000264343 | NOTCH2NLA | 1.723156814 | 0.045435959 | protein_coding |
| ENSG00000274290 | HIST1H2BE | 1.723156814 | 0.045435959 | protein_coding |
| ENSG00000119888 | EPCAM     | 1.731785431 | 0.004688294 | protein_coding |
| ENSG00000114638 | UPK1B     | 1.735445856 | 0.008764824 | protein_coding |
| ENSG00000123689 | G0S2      | 1.75189985  | 0.000137656 | protein_coding |
| ENSG00000172803 | SNX32     | 1.798352624 | 0.008204261 | protein_coding |
| ENSG00000226763 | SRRM5     | 1.805030277 | 0.033376343 | protein_coding |
| ENSG00000136206 | SPDYE1    | 1.805030277 | 0.033376343 | protein_coding |
| ENSG00000183346 | CABCO1    | 1.805030277 | 0.033376343 | protein_coding |
| ENSG00000137101 | CD72      | 1.813053776 | 0.00355334  | protein_coding |
| ENSG00000162526 | TSSK3     | 1.824389332 | 0.009730816 | protein_coding |
| ENSG00000183161 | FANCF     | 1.835522874 | 0.019137366 | protein_coding |

|                 |            |             |             |                |
|-----------------|------------|-------------|-------------|----------------|
| ENSG00000241106 | HLA-DOB    | 1.84257559  | 0.00648527  | protein_coding |
| ENSG00000104848 | KCNA7      | 1.857206395 | 0.045202178 | protein_coding |
| ENSG00000125851 | PCSK2      | 1.857206395 | 0.045202178 | protein_coding |
| ENSG00000165621 | OXGR1      | 1.87309127  | 0.007582043 | protein_coding |
| ENSG00000172264 | MACROD2    | 1.874198558 | 0.001315159 | protein_coding |
| ENSG00000197980 | LEKR1      | 1.882505856 | 0.024510598 | protein_coding |
| ENSG00000276600 | RAB7B      | 1.882505856 | 0.024510598 | protein_coding |
| ENSG00000222014 | RAB6C      | 1.895350766 | 0.003605466 | protein_coding |
| ENSG00000171121 | KCNMB3     | 1.899296634 | 0.014380224 | protein_coding |
| ENSG00000203872 | C6orf163   | 1.920202692 | 0.005911861 | protein_coding |
| ENSG00000106804 | C5         | 1.932703443 | 0.002892433 | protein_coding |
| ENSG00000100362 | PVALB      | 1.949565903 | 0.032292239 | protein_coding |
| ENSG00000206384 | COL6A6     | 1.949565903 | 0.032292239 | protein_coding |
| ENSG00000148942 | SLC5A12    | 1.965824209 | 0.004613369 | protein_coding |
| ENSG00000196335 | STK31      | 1.972160805 | 0.001027717 | protein_coding |
| ENSG00000120215 | MLANA      | 2.036366746 | 0.023070854 | protein_coding |
| ENSG00000275895 | U2AF1L5    | 2.041568501 | 4.75E-06    | protein_coding |
| ENSG00000172062 | SMN1       | 2.047432769 | 2.87E-06    | protein_coding |
| ENSG00000188107 | EYS        | 2.053223049 | 0.043991311 | protein_coding |
| ENSG00000164100 | NDST3      | 2.053223049 | 0.043991311 | protein_coding |
| ENSG00000169548 | ZNF280A    | 2.053223049 | 0.043991311 | protein_coding |
| ENSG00000104112 | SCG3       | 2.056872743 | 0.000243475 | protein_coding |
| ENSG00000256591 | AP003108.2 | 2.092715764 | 0.009732694 | protein_coding |
| ENSG00000242220 | TCP10L     | 2.156489525 | 0.007167784 | protein_coding |
| ENSG00000249437 | NAIP       | 2.15915056  | 0.030348148 | protein_coding |
| ENSG00000184113 | CLDN5      | 2.15915056  | 0.030348148 | protein_coding |
| ENSG00000226650 | KIF4B      | 2.15915056  | 0.030348148 | protein_coding |
| ENSG00000145920 | CPLX2      | 2.15915056  | 0.030348148 | protein_coding |
| ENSG00000152822 | GRM1       | 2.15915056  | 0.030348148 | protein_coding |
| ENSG00000230667 | SETSIP     | 2.257829686 | 0.020952111 | protein_coding |
| ENSG00000005102 | MEOX1      | 2.257829686 | 0.020952111 | protein_coding |
| ENSG00000196747 | HIST1H2AI  | 2.257829686 | 0.020952111 | protein_coding |
| ENSG00000092200 | RPGRIP1    | 2.28662232  | 0.000660415 | protein_coding |
| ENSG00000154269 | ENPP3      | 2.339201936 | 0.006072876 | protein_coding |
| ENSG00000100191 | SLC5A4     | 2.350189193 | 0.014485426 | protein_coding |
| ENSG00000153165 | RGPD3      | 2.371285094 | 0.041032031 | protein_coding |
| ENSG00000165917 | RAPSN      | 2.371285094 | 0.041032031 | protein_coding |
| ENSG00000124678 | TCP11      | 2.371285094 | 0.041032031 | protein_coding |
| ENSG00000112706 | IMPG1      | 2.371285094 | 0.041032031 | protein_coding |
| ENSG00000189058 | APOD       | 2.371285094 | 0.041032031 | protein_coding |
| ENSG00000171522 | PTGER4     | 2.405925696 | 0.004368548 | protein_coding |
| ENSG00000254852 | NPIPA2     | 2.436990037 | 0.010033723 | protein_coding |
| ENSG00000100298 | APOBEC3H   | 2.469699457 | 0.003149424 | protein_coding |

|                 |            |             |             |                |
|-----------------|------------|-------------|-------------|----------------|
| ENSG00000132639 | SNAP25     | 2.5188635   | 0.006966163 | protein_coding |
| ENSG00000183889 | PKD1P1     | 2.576365131 | 2.97E-05    | protein_coding |
| ENSG00000120440 | TTLL2      | 2.585097769 | 0.000660977 | protein_coding |
| ENSG00000081041 | CXCL2      | 2.715709624 | 0.011832427 | protein_coding |
| ENSG00000124091 | GCNT7      | 2.715709624 | 0.011832427 | protein_coding |
| ENSG00000197153 | HIST1H3J   | 2.715709624 | 0.011832427 | protein_coding |
| ENSG00000154263 | ABCA10     | 2.739825227 | 0.002370371 | protein_coding |
| ENSG00000166278 | C2         | 2.806548987 | 0.001665133 | protein_coding |
| ENSG00000127364 | TAS2R4     | 2.81438875  | 0.007864773 | protein_coding |
| ENSG00000276966 | HIST1H4E   | 2.81438875  | 0.007864773 | protein_coding |
| ENSG00000169393 | ELSPBP1    | 2.993549101 | 0.003515158 | protein_coding |
| ENSG00000187944 | C2orf66    | 3.003396154 | 0.034866602 | protein_coding |
| ENSG00000083814 | ZNF671     | 3.003396154 | 0.034866602 | protein_coding |
| ENSG00000182916 | TCEAL7     | 3.003396154 | 0.034866602 | protein_coding |
| ENSG00000249156 | TAF11L12   | 3.003396154 | 0.034866602 | protein_coding |
| ENSG00000205572 | SERF1B     | 3.061832655 | 1.02E-10    | protein_coding |
| ENSG00000104435 | STMN2      | 3.075422564 | 0.002364823 | protein_coding |
| ENSG00000187243 | MAGED4B    | 3.116888107 | 3.93E-07    | protein_coding |
| ENSG00000151164 | RAD9B      | 3.152898143 | 0.001597933 | protein_coding |
| ENSG00000267710 | EDDM13     | 3.152898143 | 0.001597933 | protein_coding |
| ENSG00000250673 | REELD1     | 3.153409692 | 0.021566548 | protein_coding |
| ENSG00000186453 | FAM228A    | 3.153409692 | 0.021566548 | protein_coding |
| ENSG00000140093 | SERPINA10  | 3.251819569 | 0.000111734 | protein_coding |
| ENSG00000198939 | ZFP2       | 3.289283354 | 0.013412089 | protein_coding |
| ENSG00000124334 | IL9R       | 3.289283354 | 0.013412089 | protein_coding |
| ENSG00000123338 | NCKAP1L    | 3.289283354 | 0.013412089 | protein_coding |
| ENSG00000146674 | IGFBP3     | 3.41345461  | 0.008390282 | protein_coding |
| ENSG00000187398 | LUZP2      | 3.41345461  | 0.008390282 | protein_coding |
| ENSG00000127507 | ADGRE2     | 3.41345461  | 0.008390282 | protein_coding |
| ENSG00000078596 | ITM2A      | 3.60285402  | 0.000116677 | protein_coding |
| ENSG00000102271 | KLHL4      | 5.068848838 | 1.08E-13    | protein_coding |
| ENSG00000000005 | TNMD       | 5.277000344 | 5.34E-08    | protein_coding |
| ENSG00000176358 | TAC4       | 5.606115201 | 0.040964585 | protein_coding |
| ENSG00000166869 | CHP2       | 5.606115201 | 0.040964585 | protein_coding |
| ENSG00000169302 | STK32A     | 5.606115201 | 0.040964585 | protein_coding |
| ENSG00000168404 | MLKL       | 5.606115201 | 0.040964585 | protein_coding |
| ENSG00000261582 | AL121753.1 | 5.606115201 | 0.040964585 | protein_coding |
| ENSG00000184995 | IFNE       | 5.606115201 | 0.040964585 | protein_coding |
| ENSG00000179873 | NLRP11     | 5.606115201 | 0.040964585 | protein_coding |
| ENSG00000168843 | FSTL5      | 5.606115201 | 0.040964585 | protein_coding |
| ENSG00000078579 | FGF20      | 5.606115201 | 0.040964585 | protein_coding |
| ENSG00000262576 | PCDHGA4    | 5.606115201 | 0.040964585 | protein_coding |
| ENSG00000178460 | MCMD2C2    | 5.824270165 | 0.022676824 | protein_coding |

|                 |          |             |             |                |
|-----------------|----------|-------------|-------------|----------------|
| ENSG00000147613 | PSKH2    | 5.824270165 | 0.022676824 | protein_coding |
| ENSG00000101842 | VSIG1    | 5.824270165 | 0.022676824 | protein_coding |
| ENSG00000126838 | PZP      | 5.824270165 | 0.022676824 | protein_coding |
| ENSG00000138356 | AOX1     | 5.824270165 | 0.022676824 | protein_coding |
| ENSG00000185955 | C7orf61  | 5.824270165 | 0.022676824 | protein_coding |
| ENSG00000149970 | CNKSR2   | 6.013728963 | 0.012730848 | protein_coding |
| ENSG00000004948 | CALCR    | 6.013728963 | 0.012730848 | protein_coding |
| ENSG00000010932 | FMO1     | 6.013728963 | 0.012730848 | protein_coding |
| ENSG00000162843 | WDR64    | 6.013728963 | 0.012730848 | protein_coding |
| ENSG00000124343 | XG       | 6.013728963 | 0.012730848 | protein_coding |
| ENSG00000183378 | OVCH2    | 6.013728963 | 0.012730848 | protein_coding |
| ENSG00000213714 | FAM209B  | 6.181170872 | 0.007243414 | protein_coding |
| ENSG00000172717 | FAM71D   | 6.181170872 | 0.007243414 | protein_coding |
| ENSG00000230561 | CCDC192  | 6.181170872 | 0.007243414 | protein_coding |
| ENSG00000188037 | CLCN1    | 6.181170872 | 0.007243414 | protein_coding |
| ENSG00000050628 | PTGER3   | 6.331184409 | 0.004174171 | protein_coding |
| ENSG00000204287 | HLA-DRA  | 6.331184409 | 0.004174171 | protein_coding |
| ENSG00000163705 | FANCD2OS | 6.331184409 | 0.004174171 | protein_coding |
| ENSG00000175426 | PCSK1    | 6.591229327 | 0.00143701  | protein_coding |
| ENSG00000001626 | CFTR     | 6.811482601 | 0.000517265 | protein_coding |



| <b>Commonly<br/>changed genes</b> |
|-----------------------------------|
| <b>Gene name</b>                  |
| SPSB3                             |
| AL121845.3                        |
| TEN1-CDK3                         |
| HGFAC                             |
| ACTL10                            |
| MAGED4                            |
| TMEFF1                            |
| PDXP                              |
| SMIM11A                           |
| MGAT2                             |
| GREM2                             |
| TRAPPC5                           |
| TMSB15B                           |
| SLC22A31                          |
| CYP51A1                           |
| TMEM160                           |
| ATP6V0C                           |
| ALDOA                             |
| GPX2                              |
| C22orf15                          |
| PNMT                              |
| TSPO                              |
| PRR35                             |
| MADCAM1                           |
| GPS2                              |
| ROM1                              |
| MRPL12                            |
| LAT                               |
| NPAS3                             |
| C4orf48                           |
| DPEP1                             |
| AC020915.1                        |
| CTXN1                             |
| GOLGA8K                           |
| FES                               |
| CHADL                             |
| RABAC1                            |
| COX6A1                            |
| ALKBH7                            |
| SHISA8                            |

|                    |
|--------------------|
| SAC3D1             |
| GNG13              |
| SWSAP1             |
| CKMT2              |
| NME3               |
| NDUFA11            |
| MCRIP1             |
| TRPV2              |
| CITED4             |
| H1FX               |
| CYBA               |
| HAPLN2             |
| LAGE3              |
| HES4               |
| PRR19              |
| EMID1              |
| NUTM2G             |
| CBARP              |
| ARC                |
| CSDC2              |
| AC093512.2         |
| MEGF6              |
| RTEL1-<br>TNFRSF6B |
| CFAP157            |
| FAM173A            |
| COX8A              |
| RAC3               |
| KLF16              |
| ZNF428             |
| C8orf82            |
| CNIH2              |
| ADAM8              |
| PLK5               |
| VKORC1             |
| PRSS53             |
| ILVBL              |
| SRPK3              |
| AL135905.2         |
| GNG5               |
| EPPK1              |
| PRR22              |
| ZDHHC12            |

|          |
|----------|
| NBL1     |
| FAM43B   |
| TMEM256  |
| MYOF     |
| F12      |
| ESX1     |
| KIFC2    |
| MAMDC4   |
| ZNF524   |
| PLEKHA4  |
| WDR90    |
| ZNF503   |
| ACADS    |
| TP53I13  |
| DALRD3   |
| IFI6     |
| TMEM198  |
| NPDC1    |
| VPS37D   |
| TNXB     |
| IRF2BP1  |
| CFAP410  |
| CTU1     |
| ICAM5    |
| SOX15    |
| ZBTB16   |
| MRPL23   |
| LRRC56   |
| LIN37    |
| SCAF1    |
| CITED1   |
| ALDH16A1 |
| COMTD1   |
| TENM1    |
| C6orf48  |
| ZMYND10  |
| STIMATE  |
| NDUFB2   |
| NAPRT    |
| MXD3     |
| BCL7C    |
| UQCC3    |
| SNRPB    |

|            |
|------------|
| KIF26B     |
| ARMC5      |
| TMEM121    |
| MOSPD3     |
| SAMD11     |
| MFSD10     |
| BX255925.3 |
| PTOV1      |
| STK11IP    |
| PCSK1N     |
| TPGS1      |
| HYAL2      |
| UCN        |
| SMIM4      |
| POLR2L     |
| GHDC       |
| NMB        |
| PGAP3      |
| ZGPAT      |
| CYB561D2   |
| SDR39U1    |
| H2AFX      |
| NUDT8      |
| P2RY11     |
| SPAG4      |
| TREX2      |
| SLC22A18   |
| CCNO       |
| GAS2L1     |
| TWF2       |
| NRTN       |
| TMEM150A   |
| NFATC4     |
| RHOT2      |
| UBALD1     |
| DBP        |
| NUBP2      |
| SMIM19     |
| CPLANE1    |
| EIF2S3B    |
| CARD6      |
| CFAP44     |
| GPR89A     |

|            |
|------------|
| C1orf54    |
| TBC1D3D    |
| MORC3      |
| TPT1       |
| GCC2       |
| AKAP9      |
| MIS18BP1   |
| ANKRD26    |
| BRCA2      |
| KIAA1551   |
| POLK       |
| ANAPC10    |
| CEP290     |
| SLFN5      |
| TRIP11     |
| ANKRD36B   |
| SYTL5      |
| SLC27A6    |
| SERPINB9   |
| USP6       |
| FSIP2      |
| SPDYE1     |
| COL6A6     |
| MLANA      |
| EYS        |
| KIF4B      |
| SERF1B     |
| MAGED4B    |
| EDDM13     |
| TNMD       |
| CNKSR2     |
| CFTR       |
| Gene name  |
| SPSB3      |
| AL121845.3 |
| TEN1-CDK3  |
| HGFAC      |
| ACTL10     |
| MAGED4     |
| TMEFF1     |
| PDXP       |
| SMIM11A    |
| MGAT2      |

|            |
|------------|
| GREM2      |
| TRAPPC5    |
| TMSB15B    |
| SLC22A31   |
| CYP51A1    |
| TMEM160    |
| ATP6V0C    |
| ALDOA      |
| GPX2       |
| C22orf15   |
| PNMT       |
| TSPO       |
| PRR35      |
| MADCAM1    |
| GPS2       |
| ROM1       |
| MRPL12     |
| LAT        |
| NPAS3      |
| C4orf48    |
| DPEP1      |
| AC020915.1 |
| CTXN1      |
| GOLGA8K    |
| FES        |
| CHADL      |
| RABAC1     |
| COX6A1     |
| ALKBH7     |
| SHISA8     |
| SAC3D1     |
| GNG13      |
| SWSAP1     |
| CKMT2      |
| NME3       |
| NDUFA11    |
| MCRIP1     |
| TRPV2      |
| CITED4     |
| H1FX       |
| CYBA       |
| HAPLN2     |
| LAGE3      |

|                    |
|--------------------|
| HES4               |
| PRR19              |
| EMID1              |
| NUTM2G             |
| CBARP              |
| ARC                |
| CSDC2              |
| AC093512.2         |
| MEGF6              |
| RTEL1-<br>TNFRSF6B |
| CFAP157            |
| FAM173A            |
| COX8A              |
| RAC3               |
| KLF16              |
| ZNF428             |
| C8orf82            |
| CNIH2              |
| ADAM8              |
| PLK5               |
| VKORC1             |
| PRSS53             |
| ILVBL              |
| SRPK3              |
| AL135905.2         |
| GNG5               |
| EPPK1              |
| PRR22              |
| ZDHHC12            |
| NBL1               |
| FAM43B             |
| TMEM256            |
| MYOF               |
| F12                |
| ESX1               |
| KIFC2              |
| MAMDC4             |
| ZNF524             |
| PLEKHA4            |
| WDR90              |
| ZNF503             |
| ACADS              |

|            |
|------------|
| TP53I13    |
| DALRD3     |
| IFI6       |
| TMEM198    |
| NPDC1      |
| VPS37D     |
| TNXB       |
| IRF2BP1    |
| CFAP410    |
| CTU1       |
| ICAM5      |
| SOX15      |
| ZBTB16     |
| MRPL23     |
| LRRC56     |
| LIN37      |
| SCAF1      |
| CITED1     |
| ALDH16A1   |
| COMTD1     |
| TENM1      |
| C6orf48    |
| ZMYND10    |
| STIMATE    |
| NDUFB2     |
| NAPRT      |
| MXD3       |
| BCL7C      |
| UQCC3      |
| SNRPB      |
| KIF26B     |
| ARMC5      |
| TMEM121    |
| MOSPD3     |
| SAMD11     |
| MFSD10     |
| BX255925.3 |
| PTOV1      |
| STK11IP    |
| PCSK1N     |
| TPGS1      |
| HYAL2      |
| UCN        |



|          |
|----------|
| SMIM4    |
| POLR2L   |
| GHDC     |
| NMB      |
| PGAP3    |
| ZGPAT    |
| CYB561D2 |
| SDR39U1  |
| H2AFX    |
| NUDT8    |
| P2RY11   |
| SPAG4    |
| TREX2    |
| SLC22A18 |
| CCNO     |
| GAS2L1   |
| TWF2     |
| NRTN     |
| TMEM150A |
| NFATC4   |
| RHOT2    |
| UBALD1   |
| DBP      |
| NUBP2    |
| SMIM19   |
| CPLANE1  |
| EIF2S3B  |
| CARD6    |
| CFAP44   |
| GPR89A   |
| C1orf54  |
| TBC1D3D  |
| MORC3    |
| TPT1     |
| GCC2     |
| AKAP9    |
| MIS18BP1 |
| ANKRD26  |
| BRCA2    |
| KIAA1551 |
| POLK     |
| ANAPC10  |
| CEP290   |

|          |
|----------|
| SLFN5    |
| TRIP11   |
| ANKRD36B |
| SYTL5    |
| SLC27A6  |
| SERPINB9 |
| USP6     |
| FSIP2    |
| SPDYE1   |
| COL6A6   |
| MLANA    |
| EYS      |
| KIF4B    |
| SERF1B   |
| MAGED4B  |
| EDDM13   |
| TNMD     |
| CNKSR2   |
| CFTR     |
