# Supplementary material for: ML216 Prevents DNA Damage-Induced Senescence by Modulating DBC1–BLM Interaction
Source: MDPI journal article supplement (doi:10.3390/cells12010145), 2022-12-29
Supplement: s1 [file s1]

**Supplementary Table S2: Questionnaire for the technical personnel.**

| Relevant demographics                                          |                                                             |                                                                                                                                                                                                                                                      |
|----------------------------------------------------------------|-------------------------------------------------------------|------------------------------------------------------------------------------------------------------------------------------------------------------------------------------------------------------------------------------------------------------|
| No.                                                            | Question                                                    | Answer choices                                                                                                                                                                                                                                       |
| 1                                                              | Your position with the biobank?                             | Technical personnel<br>Biobank director<br>Project/ biobank management<br>Laboratory head<br>Quality management<br>IT co-worker                                                                                                                      |
| 2                                                              | What kind of education do you have as technical personnel?  | Medical technical assistant<br>Biological technical assistant<br>Laboratory technician<br>Another educational qualification, specifically: ( <i>free text field</i> )                                                                                |
| 3                                                              | For how many years have you been working with the biobank?  | Less than 1 year<br>1 to less than 3 years<br>3 to less than 5 years<br>5 years and longer                                                                                                                                                           |
| 4                                                              | What describes your English skills best?                    | I am a native speaker<br>I can communicate easily in English on technical subjects and understand texts straight away<br>I can communicate in English<br>My English is rather weak<br>I cannot speak English at all                                  |
| Educational needs                                              |                                                             |                                                                                                                                                                                                                                                      |
| No.                                                            | Question                                                    | Answer choices                                                                                                                                                                                                                                       |
| <i>In which areas would you like to have further training?</i> |                                                             |                                                                                                                                                                                                                                                      |
| 5.a                                                            | Collection and transport of biospecimens                    | <i>7-item likert scale:</i><br><input type="radio"/> Absolutely not interested<br><input type="radio"/><br><input type="radio"/><br><input type="radio"/><br><input type="radio"/><br><input type="radio"/><br><input type="radio"/> Very interested |
| 5.b                                                            | Which topic in this area is particularly important for you? | <i>Free text field</i>                                                                                                                                                                                                                               |
| 6.a                                                            | Entry, processing, and release of biospecimens              | <i>7-item likert scale:</i><br><input type="radio"/> Absolutely not interested<br><input type="radio"/><br><input type="radio"/><br><input type="radio"/><br><input type="radio"/><br><input type="radio"/><br><input type="radio"/> Very interested |
| 6.b                                                            | Which topic in this area is particularly important for you? | <i>Free text field</i>                                                                                                                                                                                                                               |
| 7.a                                                            | Storage of biospecimens                                     | <i>7-item likert scale:</i><br><input type="radio"/> Absolutely not interested<br><input type="radio"/><br><input type="radio"/><br><input type="radio"/><br><input type="radio"/><br><input type="radio"/><br><input type="radio"/> Very interested |

|      |                                                                                                                                            |                                                                                                                                                                                                                                                                                                                                  |
|------|--------------------------------------------------------------------------------------------------------------------------------------------|----------------------------------------------------------------------------------------------------------------------------------------------------------------------------------------------------------------------------------------------------------------------------------------------------------------------------------|
| 7.b  | Which topic in this area is particularly important for you?                                                                                | Free text field                                                                                                                                                                                                                                                                                                                  |
| 8.a  | Quality management                                                                                                                         | 7-item likert scale: <ul style="list-style-type: none"> <li><input type="radio"/> Absolutely not interested</li> <li><input type="radio"/></li> <li><input type="radio"/></li> <li><input type="radio"/></li> <li><input type="radio"/></li> <li><input type="radio"/></li> <li><input type="radio"/> Very interested</li> </ul> |
| 8.b  | Which topic in this area is particularly important for you?                                                                                | Free text field                                                                                                                                                                                                                                                                                                                  |
| 9.a  | Data management and data protection                                                                                                        | 7-item likert scale: <ul style="list-style-type: none"> <li><input type="radio"/> Absolutely not interested</li> <li><input type="radio"/></li> <li><input type="radio"/></li> <li><input type="radio"/></li> <li><input type="radio"/></li> <li><input type="radio"/></li> <li><input type="radio"/> Very interested</li> </ul> |
| 9.b  | Which topic in this area is particularly important for you?                                                                                | Free text field                                                                                                                                                                                                                                                                                                                  |
| 10.a | Occupational Safety                                                                                                                        | 7-item likert scale: <ul style="list-style-type: none"> <li><input type="radio"/> Absolutely not interested</li> <li><input type="radio"/></li> <li><input type="radio"/></li> <li><input type="radio"/></li> <li><input type="radio"/></li> <li><input type="radio"/></li> <li><input type="radio"/> Very interested</li> </ul> |
| 10.b | Which topic in this area is particularly important for you?                                                                                | Free text field                                                                                                                                                                                                                                                                                                                  |
| 11.a | Ethical, legal, and social issues                                                                                                          | 7-item likert scale: <ul style="list-style-type: none"> <li><input type="radio"/> Absolutely not interested</li> <li><input type="radio"/></li> <li><input type="radio"/></li> <li><input type="radio"/></li> <li><input type="radio"/></li> <li><input type="radio"/></li> <li><input type="radio"/> Very interested</li> </ul> |
| 11.b | Which topic in this area is particularly important for you?                                                                                | Free text field                                                                                                                                                                                                                                                                                                                  |
| 12   | If there are other topics from your point of view that are important to you in connection with further education, you can enter them here: | Free text field                                                                                                                                                                                                                                                                                                                  |
| 13   | For which of these areas do you need practical skills? (Multiple answers possible)                                                         | Collection and transport of biospecimens                                                                                                                                                                                                                                                                                         |
|      |                                                                                                                                            | Entry, processing, and release of biospecimens                                                                                                                                                                                                                                                                                   |
|      |                                                                                                                                            | Storage of biospecimens                                                                                                                                                                                                                                                                                                          |
|      |                                                                                                                                            | Quality management                                                                                                                                                                                                                                                                                                               |
|      |                                                                                                                                            | Data management and data protection                                                                                                                                                                                                                                                                                              |
|      |                                                                                                                                            | Occupational safety                                                                                                                                                                                                                                                                                                              |
|      |                                                                                                                                            | Ethical, legal, and social issues                                                                                                                                                                                                                                                                                                |
|      |                                                                                                                                            | Other (free text field)                                                                                                                                                                                                                                                                                                          |
| 14   | Which of these areas should be supported by practical exercises in a further training measure? (Multiple answers possible)                 | Collection and transport of biospecimens                                                                                                                                                                                                                                                                                         |
|      |                                                                                                                                            | Entry, processing, and release of biospecimens                                                                                                                                                                                                                                                                                   |
|      |                                                                                                                                            | Storage of biospecimens                                                                                                                                                                                                                                                                                                          |
|      |                                                                                                                                            | Quality management                                                                                                                                                                                                                                                                                                               |

|                                                                                            |                                                                                                                                        |                                                                                                                                                                                                                                                                                    |
|--------------------------------------------------------------------------------------------|----------------------------------------------------------------------------------------------------------------------------------------|------------------------------------------------------------------------------------------------------------------------------------------------------------------------------------------------------------------------------------------------------------------------------------|
|                                                                                            |                                                                                                                                        | Data management and data protection                                                                                                                                                                                                                                                |
|                                                                                            |                                                                                                                                        | Occupational safety                                                                                                                                                                                                                                                                |
|                                                                                            |                                                                                                                                        | Ethical, legal, and social issues                                                                                                                                                                                                                                                  |
|                                                                                            |                                                                                                                                        | Other ( <i>free text field</i> )                                                                                                                                                                                                                                                   |
| 15                                                                                         | In which of these areas is basic knowledge sufficient? (Multiple answers possible)                                                     | Collection and transport of biospecimens<br>Entry, processing, and release of biospecimens<br>Storage of biospecimens<br>Quality management<br>Data management and data protection<br>Occupational safety<br>Ethical, legal, and social issues<br>Other ( <i>free text field</i> ) |
| <b>Existing knowledge</b>                                                                  |                                                                                                                                        |                                                                                                                                                                                                                                                                                    |
| <b>No.</b>                                                                                 | <b>Question</b>                                                                                                                        | <b>Answer choices</b>                                                                                                                                                                                                                                                              |
| 16                                                                                         | I know what the main task of a biobank is.                                                                                             | Yes<br>No                                                                                                                                                                                                                                                                          |
| <i>Please assess your skills and knowledge on the following learning objectives below:</i> |                                                                                                                                        |                                                                                                                                                                                                                                                                                    |
| 17                                                                                         | I can explain the importance of pre-analytical factors for the quality of biospecimens and can describe how these shall be documented. | 7-item likert scale:<br><input type="radio"/> Disagree entirely<br><input type="radio"/><br><input type="radio"/><br><input type="radio"/><br><input type="radio"/><br><input type="radio"/><br><input type="radio"/> Agree entirely                                               |
| 18                                                                                         | I can describe different types of biospecimens.                                                                                        |                                                                                                                                                                                                                                                                                    |
| 19                                                                                         | I know for which analyses FFPE and cryogenic tissue are suitable or not suitable.                                                      |                                                                                                                                                                                                                                                                                    |
| 20                                                                                         | I can describe the necessary steps for the transport of biospecimens.                                                                  |                                                                                                                                                                                                                                                                                    |
| 21                                                                                         | I know how to document entry and release of biospecimens.                                                                              |                                                                                                                                                                                                                                                                                    |
| 22                                                                                         | I can explain different processing methods for biospecimens.                                                                           |                                                                                                                                                                                                                                                                                    |
| 23                                                                                         | I can describe important aspects of biospecimens processing and storage.                                                               |                                                                                                                                                                                                                                                                                    |
| 24                                                                                         | I know how to prepare different biospecimens for shipment (e.g. by courier transport).                                                 |                                                                                                                                                                                                                                                                                    |
| 25                                                                                         | I can describe how the treat biospecimens after storage for further processing.                                                        |                                                                                                                                                                                                                                                                                    |
| 26                                                                                         | I can describe how to store and retrieve biospecimens to ensure their optimal use.                                                     |                                                                                                                                                                                                                                                                                    |
| 27                                                                                         | I know how to handle stored biospecimens.                                                                                              |                                                                                                                                                                                                                                                                                    |
| 28                                                                                         | I know how to properly process cryospecimens without thawing them.                                                                     |                                                                                                                                                                                                                                                                                    |
| 29                                                                                         | I can document deviations from the SOP.                                                                                                |                                                                                                                                                                                                                                                                                    |
| 30                                                                                         | I know the difference between anonymization and pseudonymization                                                                       |                                                                                                                                                                                                                                                                                    |
| 31                                                                                         | I can explain the purpose of the "Material and Data Transfer Agreement".                                                               |                                                                                                                                                                                                                                                                                    |
| 32                                                                                         | I know how to dispose biospecimens that are not going to be used.                                                                      |                                                                                                                                                                                                                                                                                    |
| 33                                                                                         | I know what to do with stored biospecimens in the event of a revocation of consent.                                                    |                                                                                                                                                                                                                                                                                    |
| 34                                                                                         | I know how to handle liquid nitrogen and dry ice.                                                                                      |                                                                                                                                                                                                                                                                                    |
| 35                                                                                         | I know how to react in a case of an accident.                                                                                          |                                                                                                                                                                                                                                                                                    |
| <b>Previous participation in advanced trainings</b>                                        |                                                                                                                                        |                                                                                                                                                                                                                                                                                    |
| <b>No.</b>                                                                                 | <b>Question</b>                                                                                                                        | <b>Answer choices</b>                                                                                                                                                                                                                                                              |
| 36                                                                                         | In how many different training courses did you participate ?                                                                           | None                                                                                                                                                                                                                                                                               |
|                                                                                            |                                                                                                                                        | 1                                                                                                                                                                                                                                                                                  |
|                                                                                            |                                                                                                                                        | 2                                                                                                                                                                                                                                                                                  |
|                                                                                            |                                                                                                                                        | 3                                                                                                                                                                                                                                                                                  |
|                                                                                            |                                                                                                                                        | 4                                                                                                                                                                                                                                                                                  |
| 37                                                                                         | What was the topic of the training?                                                                                                    | <i>Free text field</i>                                                                                                                                                                                                                                                             |
| 38                                                                                         | Was the training specifically for technical staff?                                                                                     | Yes                                                                                                                                                                                                                                                                                |

|                                                                                         |                                                                                        |                                                   |
|-----------------------------------------------------------------------------------------|----------------------------------------------------------------------------------------|---------------------------------------------------|
|                                                                                         |                                                                                        | No                                                |
| 39                                                                                      | What was the format of the training?                                                   | Practical course                                  |
|                                                                                         |                                                                                        | Online course                                     |
|                                                                                         |                                                                                        | Lecture/ theory/ seminar                          |
|                                                                                         |                                                                                        | eLearning                                         |
|                                                                                         |                                                                                        | Other ( <i>free text field</i> )                  |
| 40                                                                                      | How long did the training last?                                                        | 1 to under 3 hours                                |
|                                                                                         |                                                                                        | 3 to under 5 hours                                |
|                                                                                         |                                                                                        | 5 to 8 hours                                      |
|                                                                                         |                                                                                        | 1 to 2 days                                       |
|                                                                                         |                                                                                        | 3 to 5 days                                       |
|                                                                                         |                                                                                        | Longer                                            |
| 41                                                                                      | In which environment did the training take place?                                      | Academy                                           |
|                                                                                         |                                                                                        | Industry                                          |
|                                                                                         |                                                                                        | Other ( <i>free text field</i> )                  |
| 42                                                                                      | How much did it cost? (in €)                                                           | <i>Free text field</i>                            |
| 43                                                                                      | How difficult was it for you to get time off for the training?                         | 7 -item likert scale:                             |
|                                                                                         |                                                                                        | <input type="radio"/> Very difficult              |
|                                                                                         |                                                                                        | <input type="radio"/>                             |
|                                                                                         |                                                                                        | <input type="radio"/> Not difficult at all        |
| 44                                                                                      | How motivated were you to participate in the training?                                 | 7-item Likert scale:                              |
|                                                                                         |                                                                                        | <input type="radio"/> Absolutely not motivated    |
|                                                                                         |                                                                                        | <input type="radio"/>                             |
|                                                                                         |                                                                                        | <input type="radio"/> Highly motivated            |
| 45                                                                                      | How satisfied were you with the training?                                              | 7-item Likert scale:                              |
|                                                                                         |                                                                                        | <input type="radio"/> Absolutely not satisfied    |
|                                                                                         |                                                                                        | <input type="radio"/>                             |
|                                                                                         |                                                                                        | <input type="radio"/> Very satisfied              |
| <b>Questions along the design of a future advanced training for biobank technicians</b> |                                                                                        |                                                   |
| <b>No.</b>                                                                              | <b>Question</b>                                                                        | <b>Answer choices</b>                             |
| 46                                                                                      | Do you have any suggestions and proposals on how to improve further training measures? | <i>Free text field</i>                            |
| 47                                                                                      | Have you already had experience with eLearning courses?                                | Yes                                               |
|                                                                                         |                                                                                        | No                                                |
| 48                                                                                      | What do you think are the advantages of eLearning?                                     | <i>Free text field</i>                            |
| 49                                                                                      | What do you think are the disadvantages of eLearning?                                  | <i>Free text field</i>                            |
| 50                                                                                      | What kind of learning method do you prefer?                                            | eLearning/ online course                          |
|                                                                                         |                                                                                        | Printed scripts                                   |
|                                                                                         |                                                                                        | Lecture/ theory/ seminar                          |
|                                                                                         |                                                                                        | Practical course                                  |
|                                                                                         |                                                                                        | Combination of theoretical and practical training |
|                                                                                         |                                                                                        | Other, please fill in: ( <i>free text field</i> ) |

|                             |                                                                                                                                                                |                                                              |
|-----------------------------|----------------------------------------------------------------------------------------------------------------------------------------------------------------|--------------------------------------------------------------|
| 51                          | Would you appreciate a final test in a further training measure to check your learning success?                                                                | Yes                                                          |
|                             |                                                                                                                                                                | No                                                           |
| 52                          | Would you like to receive a certificate as proof that you passed the examination?                                                                              | Yes                                                          |
|                             |                                                                                                                                                                | No                                                           |
| 53                          | In my opinion, a good further education measure should:                                                                                                        | ... be well organized                                        |
|                             |                                                                                                                                                                | ... communicate knowledge in a simple and understandable way |
|                             |                                                                                                                                                                | ... take place in groups                                     |
|                             |                                                                                                                                                                | ... be designed for self-study                               |
|                             |                                                                                                                                                                | ... be application-oriented                                  |
|                             |                                                                                                                                                                | Other (free text field)                                      |
| <b>Ending of the survey</b> |                                                                                                                                                                |                                                              |
| <b>No.</b>                  | <b>Question</b>                                                                                                                                                | <b>Answer choices</b>                                        |
| 54                          | What age group are you in?                                                                                                                                     | younger than 20                                              |
|                             |                                                                                                                                                                | 20-29                                                        |
|                             |                                                                                                                                                                | 30-39                                                        |
|                             |                                                                                                                                                                | 40-49                                                        |
|                             |                                                                                                                                                                | 50-59                                                        |
|                             |                                                                                                                                                                | 60 and older                                                 |
| 55                          | Is there anything else you would like to tell us concerning our survey or the topic of "Further training in biobanks"? Here you have the opportunity to do so: | Free text field                                              |
