# Supplementary material for: ML216 Prevents DNA Damage-Induced Senescence by Modulating DBC1–BLM Interaction
Source: MDPI journal article supplement (doi:10.3390/cells12010145), 2022-12-29
Supplement: s1 [file s1]

| gene name                 | forward sequence             | reverse sequence             |
|---------------------------|------------------------------|------------------------------|
| p21 (human)               | GACACCACTGGAGGGTGA<br>CT     | CAGGTCCACATGGTCTTCC<br>T     |
| p16 (human)               | CCAACGCACCGAATAGTT<br>ACG    | GCGCTGCCCATCATCATG           |
| cxcl1 (human)             | GAAAGCTTGCCTCAATCCT<br>G     | CACCAGTGAGCTTCCTCCT<br>C     |
| cxcl2 (human)             | AACTGCGCTGCCAGTGCT           | CCCATTCTTGAGTGTGGCT<br>A     |
| IL-6 (human)              | CCGGGAACGAAAGAGAAG<br>CT     | GCGCTTGTTGGAGAAGGAG<br>TT    |
| IL-8 (human)              | CTTTCCACCCCAAATTTAT<br>CAAAG | CAGACAGAGCTCTCTTCC<br>ATCAGA |
| MMP-2<br>(human)          | CCCACTGCGGTTTTCTCGA<br>AT    | CAAAGGGGTATCCATCGC<br>CAT    |
| MMP-9<br>(human)          | GCCACTACTGTGCCTTTGA<br>GTC   | CCCTCAGAGAATCGCCAG<br>TACT   |
| MMP-3<br>(human)          | ACTCACAGACCTGACTCG<br>GTT    | AAGCAGGATCACAGTTGG<br>CTGG   |
| MMP-12<br>(human)         | GATGCTGTCACTACCGTG<br>GGAA   | CAATGCCAGATGGCAAGG<br>TTGG   |
| TIMP1<br>(human)          | GGAGAGTGTCTGCGGATA<br>CTTC   | GCAGGTAGTGATGTGCAA<br>GAGTC  |
| IL-1 $\alpha$ (human)     | TGTATGTGACTGCCCAAG<br>ATGAAG | AGAGGAGGTTGGTCTCAC<br>TACC   |
| cyclinD1<br>(human)       | TCTACACCGACAACCTCCAT<br>CCG  | TCTGGCATTTTGGAGAGG<br>AAGTG  |
| cyclinE<br>(human)        | TGTGTCCTGGATGTTGACT<br>GCC   | CTCTATGTCGCACCACTGA<br>TACC  |
| 18sRNA<br>(human)         | GCTTAATTTGACTCAACAC<br>GGGA  | AGCTATCAATCTGTCAATC<br>CTGTC |
| DBC1<br>(human)           | ATGTCCCAGTTTAAGCGCC<br>AG    | CCCAAAGTAGTCATGCAA<br>GCTG   |
| BLM (human)               | CAGACTCCGAAGGAAGTT<br>GTATG  | TTTGGGGTGGTGTAACAA<br>ATGAT  |
| HPRT<br>(human)           | CCTGGCGTCGTGATTAGTG<br>AT    | AGACG TTCAGTCCTGTCCA<br>TAA  |
| <i>Gapdh</i><br>(mouse)   | GGAGAGTGTTTCCTCGTCC<br>C     | ACTGTGCCGTTGAATTTGC<br>C     |
| <i>Colla1</i> (mouse<br>) | GCTCCTCTTAGGGGCCACT          | ATTGGGGACCCTTAGGCC<br>AT     |
| <i>Col2A1</i><br>(mouse)  | TGGTGCTCGGGGTAACGA<br>T      | GGCTCCAGGAATACCATC<br>AGT    |

|                                       |                            |                               |
|---------------------------------------|----------------------------|-------------------------------|
| <i>Ctgf</i> (mouse)                   | GCGCCTGTTCTAAGACCTG<br>T   | TTCATGATCTCGCCATCGG<br>G      |
| <i>Mmp2</i> (mouse)                   | ACCTGAACACTTTCTATGG<br>CTG | CTTCCGCATGGTCTCGATG           |
| <i>Mmp9</i> (mouse)                   | GCAGAGGCATACTTGTAC<br>CG   | TGATGTTATGATGGTCCCA<br>CTTG   |
| <i>Fn1</i> (mouse)                    | AGGAAGCCGAGGTTTTAA<br>CTG  | AGGACGCTCATAAGTGTC<br>ACC     |
| <i>Tgf-<math>\beta</math></i> (mouse) | TCAGACATTCGGAAGCA<br>GT    | ACGCCAGGAATTGTTGCT<br>AT      |
| <i>ANF</i> (mouse)                    | GTGCGGTGTCCAACACAG<br>AT   | TCCAATCCTGTCAATCCTA<br>CCC    |
| <i>MHC</i> (mouse)                    | CCTGCGGAAGTCTGAGAA<br>GG   | CTCGGGACACGATCTTGG<br>C       |
| <i>Colla2</i><br>(mouse)              | CTGGTCCTGTTGGAAGTCG<br>T   | CAGATGCACCTGTTTCTCC<br>A      |
| <i>PPIA</i> (mouse)                   | GAGCTGTTTGCAGACAAA<br>GTTC | CCCTGGCACATGAATCCT<br>GG      |
| <i>actin</i> (mouse)                  | GTGACGTTGACATCCGTA<br>AAGA | GCCGGACTCATCGTACTCC           |
| <i>Collagen I</i><br>(mouse)          | ACCTTACCAGACTGAGAC<br>TCC  | TTTGGCTCATTCGATCCTG<br>ATACCC |

**Supplementary Table S2.** The list for the primer sequences used in RT-PCR.
