# Supplementary material for: ML216 Prevents DNA Damage-Induced Senescence by Modulating DBC1–BLM Interaction
Source: MDPI journal article supplement (doi:10.3390/cells12010145), 2022-12-29
Supplement: s1 [file s1]

**Supplemental Table S1: Questionnaire for the co-workers of the technical personnel**

| Relevant demographics                                                 |                                                                                                                           |                                                                                                       |
|-----------------------------------------------------------------------|---------------------------------------------------------------------------------------------------------------------------|-------------------------------------------------------------------------------------------------------|
| No.                                                                   | Question                                                                                                                  | Answer choices                                                                                        |
| 1                                                                     | Your position with the biobank?                                                                                           | Technical personnel                                                                                   |
|                                                                       |                                                                                                                           | Biobank director                                                                                      |
|                                                                       |                                                                                                                           | Project/ biobank management                                                                           |
|                                                                       |                                                                                                                           | Laboratory head                                                                                       |
|                                                                       |                                                                                                                           | Quality management                                                                                    |
|                                                                       |                                                                                                                           | IT co-worker                                                                                          |
| 2                                                                     | How many years have you been working in the biobank?                                                                      | Free text field                                                                                       |
| 3                                                                     | How many technical staff work in your biobank?                                                                            | Free text field                                                                                       |
| 4                                                                     | How good do you think are the English skills of most of your technical staff?                                             | Native speaker                                                                                        |
|                                                                       |                                                                                                                           | They can communicate easily in English about technical content and understand texts on the first try. |
|                                                                       |                                                                                                                           | They can communicate in English.                                                                      |
|                                                                       |                                                                                                                           | Their English is rather weak.                                                                         |
|                                                                       |                                                                                                                           | They can't communicate in English at all.                                                             |
| Questions concerning the educational needs of the technical personnel |                                                                                                                           |                                                                                                       |
| No.                                                                   | Question                                                                                                                  | Answer choices                                                                                        |
| 5.a                                                                   | How many of your technical staff would benefit from further training in "collection and transport of biospecimens"?       | All                                                                                                   |
|                                                                       |                                                                                                                           | Most                                                                                                  |
|                                                                       |                                                                                                                           | Half                                                                                                  |
|                                                                       |                                                                                                                           | Few                                                                                                   |
|                                                                       |                                                                                                                           | None                                                                                                  |
| 5.b                                                                   | Which topic in this area is particularly important for you?                                                               | Free text field                                                                                       |
| 6.a                                                                   | How many of your technical staff would benefit from further training in "entry, processing, and release of biospecimens"? | All                                                                                                   |
|                                                                       |                                                                                                                           | Most                                                                                                  |
|                                                                       |                                                                                                                           | Half                                                                                                  |
|                                                                       |                                                                                                                           | Few                                                                                                   |
|                                                                       |                                                                                                                           | None                                                                                                  |
| 6.b                                                                   | Which topic in this area is particularly important for you?                                                               | Free text field                                                                                       |
| 7.a                                                                   | How many of your technical staff would benefit from further training in "storage of biospecimens"?                        | All                                                                                                   |
|                                                                       |                                                                                                                           | Most                                                                                                  |
|                                                                       |                                                                                                                           | Half                                                                                                  |
|                                                                       |                                                                                                                           | Few                                                                                                   |
|                                                                       |                                                                                                                           | None                                                                                                  |
| 7.b                                                                   | Which topic in this area is particularly important for you?                                                               | Free text field                                                                                       |
| 8.a                                                                   | How many of your technical staff would benefit from further training in "quality management"?                             | All                                                                                                   |
|                                                                       |                                                                                                                           | Most                                                                                                  |
|                                                                       |                                                                                                                           | Half                                                                                                  |
|                                                                       |                                                                                                                           | Few                                                                                                   |
|                                                                       |                                                                                                                           | None                                                                                                  |
| 8.b                                                                   | Which topic in this area is particularly important for you?                                                               | Free text field                                                                                       |
| 9.a                                                                   | How many of your technical staff would benefit from further training in "data management and data protection"?            | All                                                                                                   |
|                                                                       |                                                                                                                           | Most                                                                                                  |
|                                                                       |                                                                                                                           | Half                                                                                                  |

|                                                                                                         |                                                                                                                                 |                                                |
|---------------------------------------------------------------------------------------------------------|---------------------------------------------------------------------------------------------------------------------------------|------------------------------------------------|
|                                                                                                         |                                                                                                                                 | Few                                            |
|                                                                                                         |                                                                                                                                 | None                                           |
| 9.b                                                                                                     | Which topic in this area is particularly important for you?                                                                     | <i>Free text field</i>                         |
| 10.a                                                                                                    | How many of your technical staff would benefit from further training in the area of "occupational safety"?                      | All                                            |
|                                                                                                         |                                                                                                                                 | Most                                           |
|                                                                                                         |                                                                                                                                 | Half                                           |
|                                                                                                         |                                                                                                                                 | Few                                            |
|                                                                                                         |                                                                                                                                 | None                                           |
| 10.b                                                                                                    | Which topic in this area is particularly important for you?                                                                     | <i>Free text field</i>                         |
| 11.a                                                                                                    | How many of your technical staff would benefit from further training in the area of "ethical, legal and social issues"?         | All                                            |
|                                                                                                         |                                                                                                                                 | Most                                           |
|                                                                                                         |                                                                                                                                 | Half                                           |
|                                                                                                         |                                                                                                                                 | Few                                            |
|                                                                                                         |                                                                                                                                 | None                                           |
| 11.b                                                                                                    | Which topic in this area is particularly important for you?                                                                     | <i>Free text field</i>                         |
| 12                                                                                                      | If you have other topics that you consider important with regards to further trainings, you can list them here:                 | <i>Free text field</i>                         |
| 13                                                                                                      | For which of the following areas do you think your technical staff need practical skills? (Multiple answers possible)           | Collection and transport of biospecimens       |
|                                                                                                         |                                                                                                                                 | Entry, processing, and release of biospecimens |
|                                                                                                         |                                                                                                                                 | Storage of biospecimens                        |
|                                                                                                         |                                                                                                                                 | Quality management                             |
|                                                                                                         |                                                                                                                                 | Data management and data protection            |
|                                                                                                         |                                                                                                                                 | Occupational safety                            |
|                                                                                                         |                                                                                                                                 | Ethical, legal, and social issues              |
|                                                                                                         |                                                                                                                                 | Others ( <i>free text field</i> )              |
| 14                                                                                                      | Which of the following areas should be supported by practical training measures? (Multiple answers possible)                    | Collection and transport of biospecimens       |
|                                                                                                         |                                                                                                                                 | Entry, processing, and release of biospecimens |
|                                                                                                         |                                                                                                                                 | Storage of biospecimens                        |
|                                                                                                         |                                                                                                                                 | Quality management                             |
|                                                                                                         |                                                                                                                                 | Data management and data protection            |
|                                                                                                         |                                                                                                                                 | Occupational safety                            |
|                                                                                                         |                                                                                                                                 | Ethical, legal, and social issues              |
|                                                                                                         |                                                                                                                                 | Other ( <i>free text field</i> )               |
| 15                                                                                                      | In which areas do you think your technical staff only needs basic knowledge? (Multiple answers possible)                        | Collection and transport of biospecimens       |
|                                                                                                         |                                                                                                                                 | Entry, processing, and release of biospecimens |
|                                                                                                         |                                                                                                                                 | Storage of biospecimens                        |
|                                                                                                         |                                                                                                                                 | Quality management                             |
|                                                                                                         |                                                                                                                                 | Data management and data protection            |
|                                                                                                         |                                                                                                                                 | Occupational safety                            |
|                                                                                                         |                                                                                                                                 | Ethical, legal, and social issues              |
|                                                                                                         |                                                                                                                                 | Other ( <i>free text field</i> )               |
| <b>Assessment of already existing knowledge</b>                                                         |                                                                                                                                 |                                                |
| <b>No.</b>                                                                                              | <b>Question</b>                                                                                                                 | <b>Answer choices</b>                          |
| 16                                                                                                      | My technical staff understood what the main task of a biobank is.                                                               | Yes                                            |
|                                                                                                         |                                                                                                                                 | No                                             |
| <i>Please assess the skills and knowledge of your technical staff on the learning objectives below:</i> |                                                                                                                                 |                                                |
| 17                                                                                                      | They can explain the importance of preanalytical factors for the quality of biospecimens and can describe how to document them. |                                                |
| 18                                                                                                      | They can describe the different types of biospecimens.                                                                          |                                                |

|                                   |                                                                                                 |                                                                                                                                                                                                                                                                                                                                                 |
|-----------------------------------|-------------------------------------------------------------------------------------------------|-------------------------------------------------------------------------------------------------------------------------------------------------------------------------------------------------------------------------------------------------------------------------------------------------------------------------------------------------|
| 19                                | They know for which analyses FFPE and cryogenic tissue are suitable or not suitable.            | 7-item likert scale:<br><input type="radio"/> Strongly agree<br><input type="radio"/><br><input type="radio"/><br><input type="radio"/><br><input type="radio"/><br><input type="radio"/><br><input type="radio"/> Strongly disagree                                                                                                            |
| 20                                | They can describe the necessary steps needed for the transport of biospecimens.                 |                                                                                                                                                                                                                                                                                                                                                 |
| 21                                | They know how to document the entry and release of biospecimens.                                |                                                                                                                                                                                                                                                                                                                                                 |
| 22                                | They can explain different processing methods for biospecimens.                                 |                                                                                                                                                                                                                                                                                                                                                 |
| 23                                | They can describe the most important aspects of processing and storage of biospecimens.         |                                                                                                                                                                                                                                                                                                                                                 |
| 24                                | They know how to prepare various biospecimens for shipment (e.g., by courier transport).        |                                                                                                                                                                                                                                                                                                                                                 |
| 25                                | They can describe how biospecimens should be handled best for further processing after storage. |                                                                                                                                                                                                                                                                                                                                                 |
| 26                                | They can describe how to store and retrieve biospecimens to ensure their optimal use.           |                                                                                                                                                                                                                                                                                                                                                 |
| 27                                | They know how to handle stored biospecimens.                                                    |                                                                                                                                                                                                                                                                                                                                                 |
| 28                                | They know how to proper process cryospecimens without thawing them.                             |                                                                                                                                                                                                                                                                                                                                                 |
| 29                                | They can document deviations from SOPs.                                                         |                                                                                                                                                                                                                                                                                                                                                 |
| 30                                | You know the difference between anonymization and pseudonymization.                             |                                                                                                                                                                                                                                                                                                                                                 |
| 31                                | They can explain the purpose of the "Material and Data Transfer Agreement".                     |                                                                                                                                                                                                                                                                                                                                                 |
| 32                                | They know how to dispose biospecimens that are not going to be used.                            |                                                                                                                                                                                                                                                                                                                                                 |
| 33                                | They know how to proceed with stored biospecimens in the event of a revocation of consent.      |                                                                                                                                                                                                                                                                                                                                                 |
| 34                                | They know how to handle liquid nitrogen and dry ice.                                            |                                                                                                                                                                                                                                                                                                                                                 |
| 35                                | They how to react in a case of an accident.                                                     |                                                                                                                                                                                                                                                                                                                                                 |
| Experience with further trainings |                                                                                                 |                                                                                                                                                                                                                                                                                                                                                 |
| No.                               | Question                                                                                        | Answer choices                                                                                                                                                                                                                                                                                                                                  |
| 36                                | Did your technical staff already participate in further training?                               | Yes, all                                                                                                                                                                                                                                                                                                                                        |
|                                   |                                                                                                 | Yes, some                                                                                                                                                                                                                                                                                                                                       |
|                                   |                                                                                                 | None                                                                                                                                                                                                                                                                                                                                            |
| 37                                | On how many training courses did your technical staff participate?                              | <input type="radio"/> None<br><input type="radio"/> 1<br><input type="radio"/> 2<br><input type="radio"/> 3<br><input type="radio"/> 4<br><input type="radio"/> 5<br><input type="radio"/> 6<br><input type="radio"/> 7<br><input type="radio"/> 8<br><input type="radio"/> 9<br><input type="radio"/> 10<br><input type="radio"/> More than 10 |
| 38                                | What was the topic of the training?                                                             | Free text field                                                                                                                                                                                                                                                                                                                                 |
| 39                                | Was the training specifically for technical staff?                                              | Yes                                                                                                                                                                                                                                                                                                                                             |
|                                   |                                                                                                 | No                                                                                                                                                                                                                                                                                                                                              |
| 40                                | What was the format of the training?                                                            | Practical course                                                                                                                                                                                                                                                                                                                                |
|                                   |                                                                                                 | Online- course                                                                                                                                                                                                                                                                                                                                  |
|                                   |                                                                                                 | Lecture/ theory/ seminar                                                                                                                                                                                                                                                                                                                        |
|                                   |                                                                                                 | eLearning                                                                                                                                                                                                                                                                                                                                       |
|                                   |                                                                                                 | Others (free text field)                                                                                                                                                                                                                                                                                                                        |
| 41                                | How long did the training last?                                                                 | 1 to less than 3 hours                                                                                                                                                                                                                                                                                                                          |

|                                                                              |                                                                                                                          |                                                                                                                                                                                                                                                      |
|------------------------------------------------------------------------------|--------------------------------------------------------------------------------------------------------------------------|------------------------------------------------------------------------------------------------------------------------------------------------------------------------------------------------------------------------------------------------------|
|                                                                              |                                                                                                                          | 3 to less than 5 hours                                                                                                                                                                                                                               |
|                                                                              |                                                                                                                          | 5 to 8 hours                                                                                                                                                                                                                                         |
|                                                                              |                                                                                                                          | 1 - 2 days                                                                                                                                                                                                                                           |
|                                                                              |                                                                                                                          | 3 – 5 days                                                                                                                                                                                                                                           |
|                                                                              |                                                                                                                          | Longer                                                                                                                                                                                                                                               |
| 42                                                                           | In which environment did the training take place?                                                                        | Academy                                                                                                                                                                                                                                              |
|                                                                              |                                                                                                                          | Industry                                                                                                                                                                                                                                             |
|                                                                              |                                                                                                                          | Others ( <i>free text field</i> )                                                                                                                                                                                                                    |
| 43                                                                           | How much did the training cost per employee? (in €)                                                                      | <i>Free text field</i>                                                                                                                                                                                                                               |
| 44                                                                           | How motivated was your technical staff to participate in the training?                                                   | <i>7-item Likert scale:</i><br><input type="radio"/> Absolutely not motivated<br><input type="radio"/><br><input type="radio"/><br><input type="radio"/><br><input type="radio"/><br><input type="radio"/><br><input type="radio"/> Highly motivated |
| 45                                                                           | How satisfied were your technical staff with the training?                                                               | <i>7-item Likert scale:</i><br><input type="radio"/> Absolutely not satisfied<br><input type="radio"/><br><input type="radio"/><br><input type="radio"/><br><input type="radio"/><br><input type="radio"/><br><input type="radio"/> Very satisfied   |
| <b>Questions concerning the educational needs of the technical personnel</b> |                                                                                                                          |                                                                                                                                                                                                                                                      |
| <b>No.</b>                                                                   | <b>Question</b>                                                                                                          | <b>Answer choices</b>                                                                                                                                                                                                                                |
| 46                                                                           | Do you have any suggestions and proposals on how to improve further training measures?                                   | <i>Free text field</i>                                                                                                                                                                                                                               |
| 47                                                                           | Have you already had experience with eLearning courses?                                                                  | Yes                                                                                                                                                                                                                                                  |
|                                                                              |                                                                                                                          | No                                                                                                                                                                                                                                                   |
| 48                                                                           | What do you think are the advantages of eLearning?                                                                       | <i>Free text field</i>                                                                                                                                                                                                                               |
| 49                                                                           | What do you think are the disadvantages of eLearning?                                                                    | <i>Free text field</i>                                                                                                                                                                                                                               |
| 50                                                                           | Which learning method do you prefer?                                                                                     | Printed scripts                                                                                                                                                                                                                                      |
|                                                                              |                                                                                                                          | eLearning/ online course                                                                                                                                                                                                                             |
|                                                                              |                                                                                                                          | Lecture/ theory/ seminar                                                                                                                                                                                                                             |
|                                                                              |                                                                                                                          | Practical course                                                                                                                                                                                                                                     |
|                                                                              |                                                                                                                          | Combination of theoretical and practical training                                                                                                                                                                                                    |
| 51                                                                           | Would you appreciate a final test in a further training measure to examine the learning success of your technical staff? | Yes                                                                                                                                                                                                                                                  |
|                                                                              |                                                                                                                          | No                                                                                                                                                                                                                                                   |
| 52                                                                           | Would you appreciate a certificate being issued to your technical staff as proof that they passed the test?              | Yes                                                                                                                                                                                                                                                  |
|                                                                              |                                                                                                                          | No                                                                                                                                                                                                                                                   |
| 53                                                                           | What budget would be available for further training? (in € per year)                                                     | <i>Free text field</i>                                                                                                                                                                                                                               |
| 54                                                                           | In my opinion, a good further training measure should:                                                                   | ... be well organized                                                                                                                                                                                                                                |
|                                                                              |                                                                                                                          | ... communicate knowledge in a simple and understandable way                                                                                                                                                                                         |
|                                                                              |                                                                                                                          | ... take place in groups                                                                                                                                                                                                                             |
|                                                                              |                                                                                                                          | ... be designed for self-study                                                                                                                                                                                                                       |

|                              |                                                                                                                                                                |                                  |
|------------------------------|----------------------------------------------------------------------------------------------------------------------------------------------------------------|----------------------------------|
|                              |                                                                                                                                                                | ... be application-oriented      |
|                              |                                                                                                                                                                | Other ( <i>free text field</i> ) |
| <b>Relevant demographics</b> |                                                                                                                                                                |                                  |
| <b>No.</b>                   | <b>Question</b>                                                                                                                                                | <b>Answer choices</b>            |
| 55                           | What age group are you in?                                                                                                                                     | younger than 20                  |
|                              |                                                                                                                                                                | 20-29                            |
|                              |                                                                                                                                                                | 30-39                            |
|                              |                                                                                                                                                                | 40-49                            |
|                              |                                                                                                                                                                | 50-59                            |
|                              |                                                                                                                                                                | 60 and older                     |
| 56                           | Is there anything else you would like to tell us concerning our survey or the topic of "Further training in biobanks"? Here you have the opportunity to do so: | <i>Free text field</i>           |
